# Supplementary material for: Mass Spectrometric ITEM-FIVE Analysis Reveals Increasing Trimer Stability of T4 Fibritin Foldon Variants Upon Introduction of N-terminal Amino Acid Residues with Artificial Space-Demanding Side-chains
Source: Research Square preprint supplement (doi:10.21203/rs.3.rs-7119075/v1), 2025-07-24
Supplement: Supplementary file 1 [file ddd7f07db120e1ecc33a2cc5.docx]

**Mass Spectrometric ITEM-FIVE Analysis Reveals Increasing Trimer Stability of
T4 Fibritin Foldon Variants Upon Introduction of N-terminal Amino Acid Residues with Artificial Space-Demanding Side-chains.**

Cornelia Koy 1), Timo Zimmer 2), Kwabena F. M. Opuni 3), Armin Geyer 2), Michael O. Glocker 1)

1) Proteome Center Rostock, Medical Faculty and Natural Science Faculty, University of Rostock, Schillingallee 69, 18057 Rostock, Germany

2) Philipps-University Marburg, Department of Chemistry, Hans-Meerwein-Straße 4, 35032 Marburg, Germany

3) Department of Pharmaceutical Chemistry, School of Pharmacy, College of Health Science, University of Ghana, P.O. Box LG43, Legon, Ghana


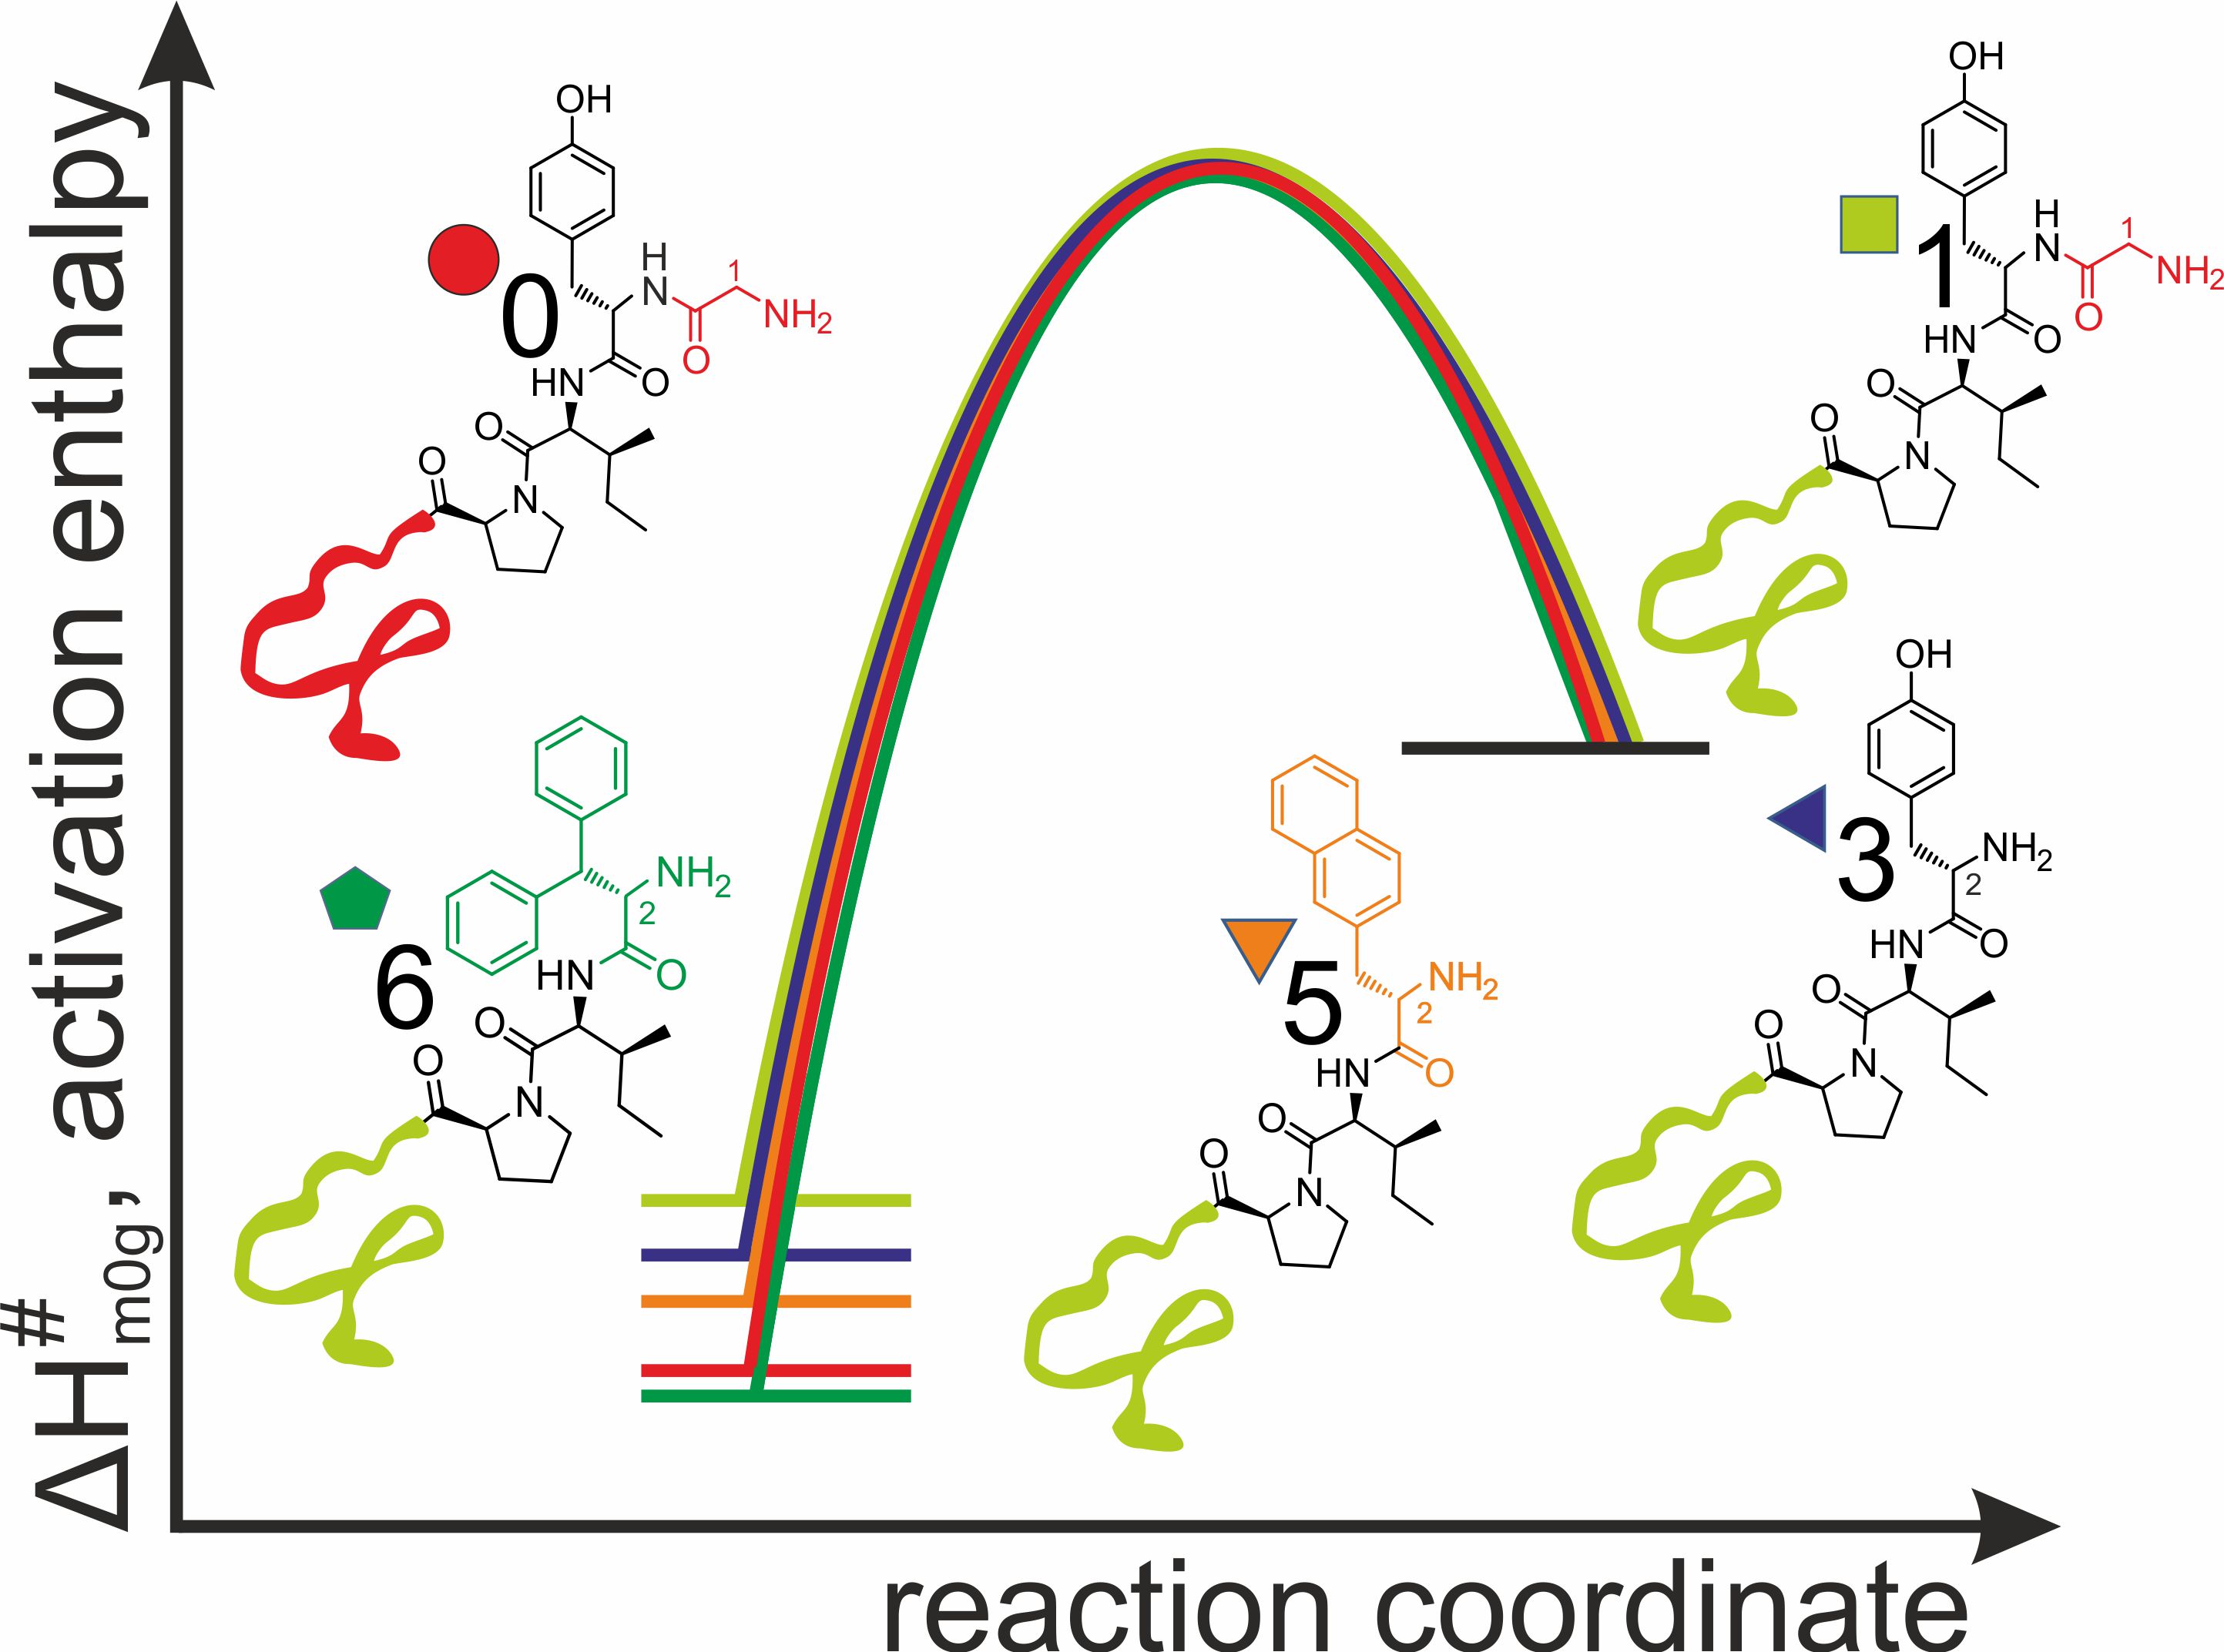


**Supplement**

Supplemental figures page 1

Supplemental tables page 12

# Supplement Figures


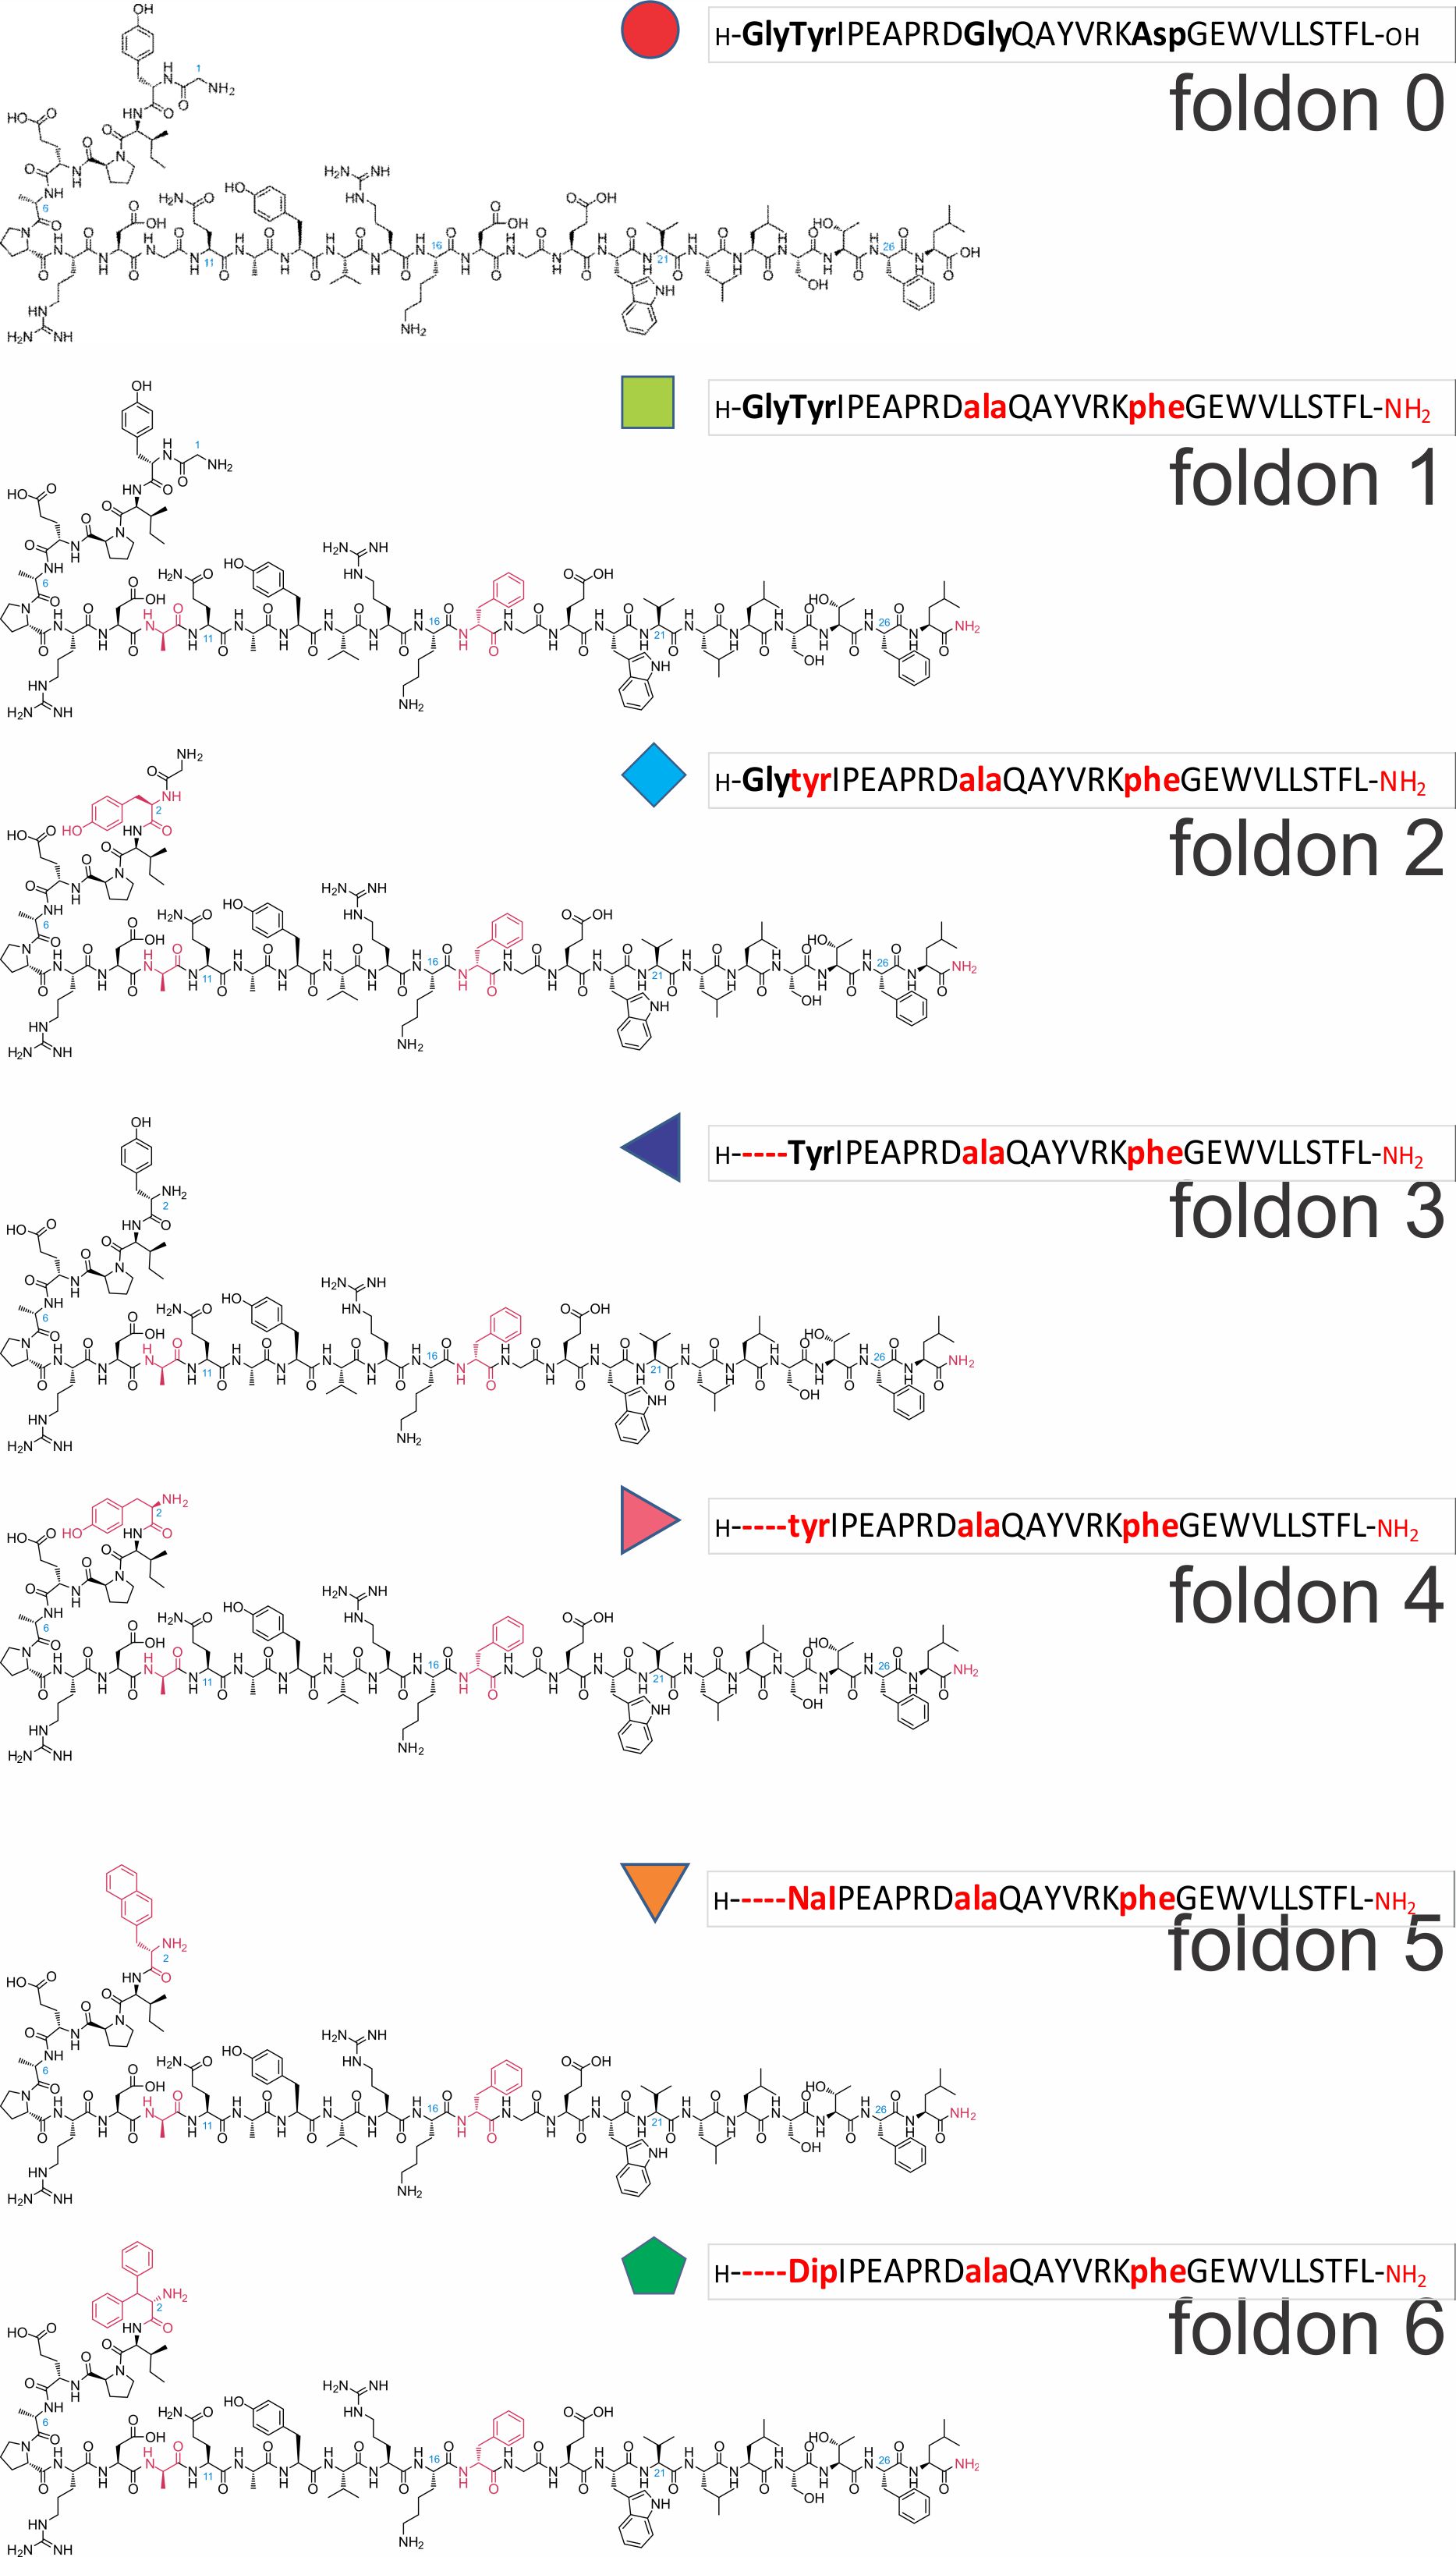


**Figure S1:** Chemical structures of T4Ff foldon and synthetic variants. Amino acid sequences are written in single letter code except for amino acid residues which are altered in the synthetic foldons. Exchanged amino acids are printed in red and bold and in the three letter code. D-amino acid residues are written in small letters.


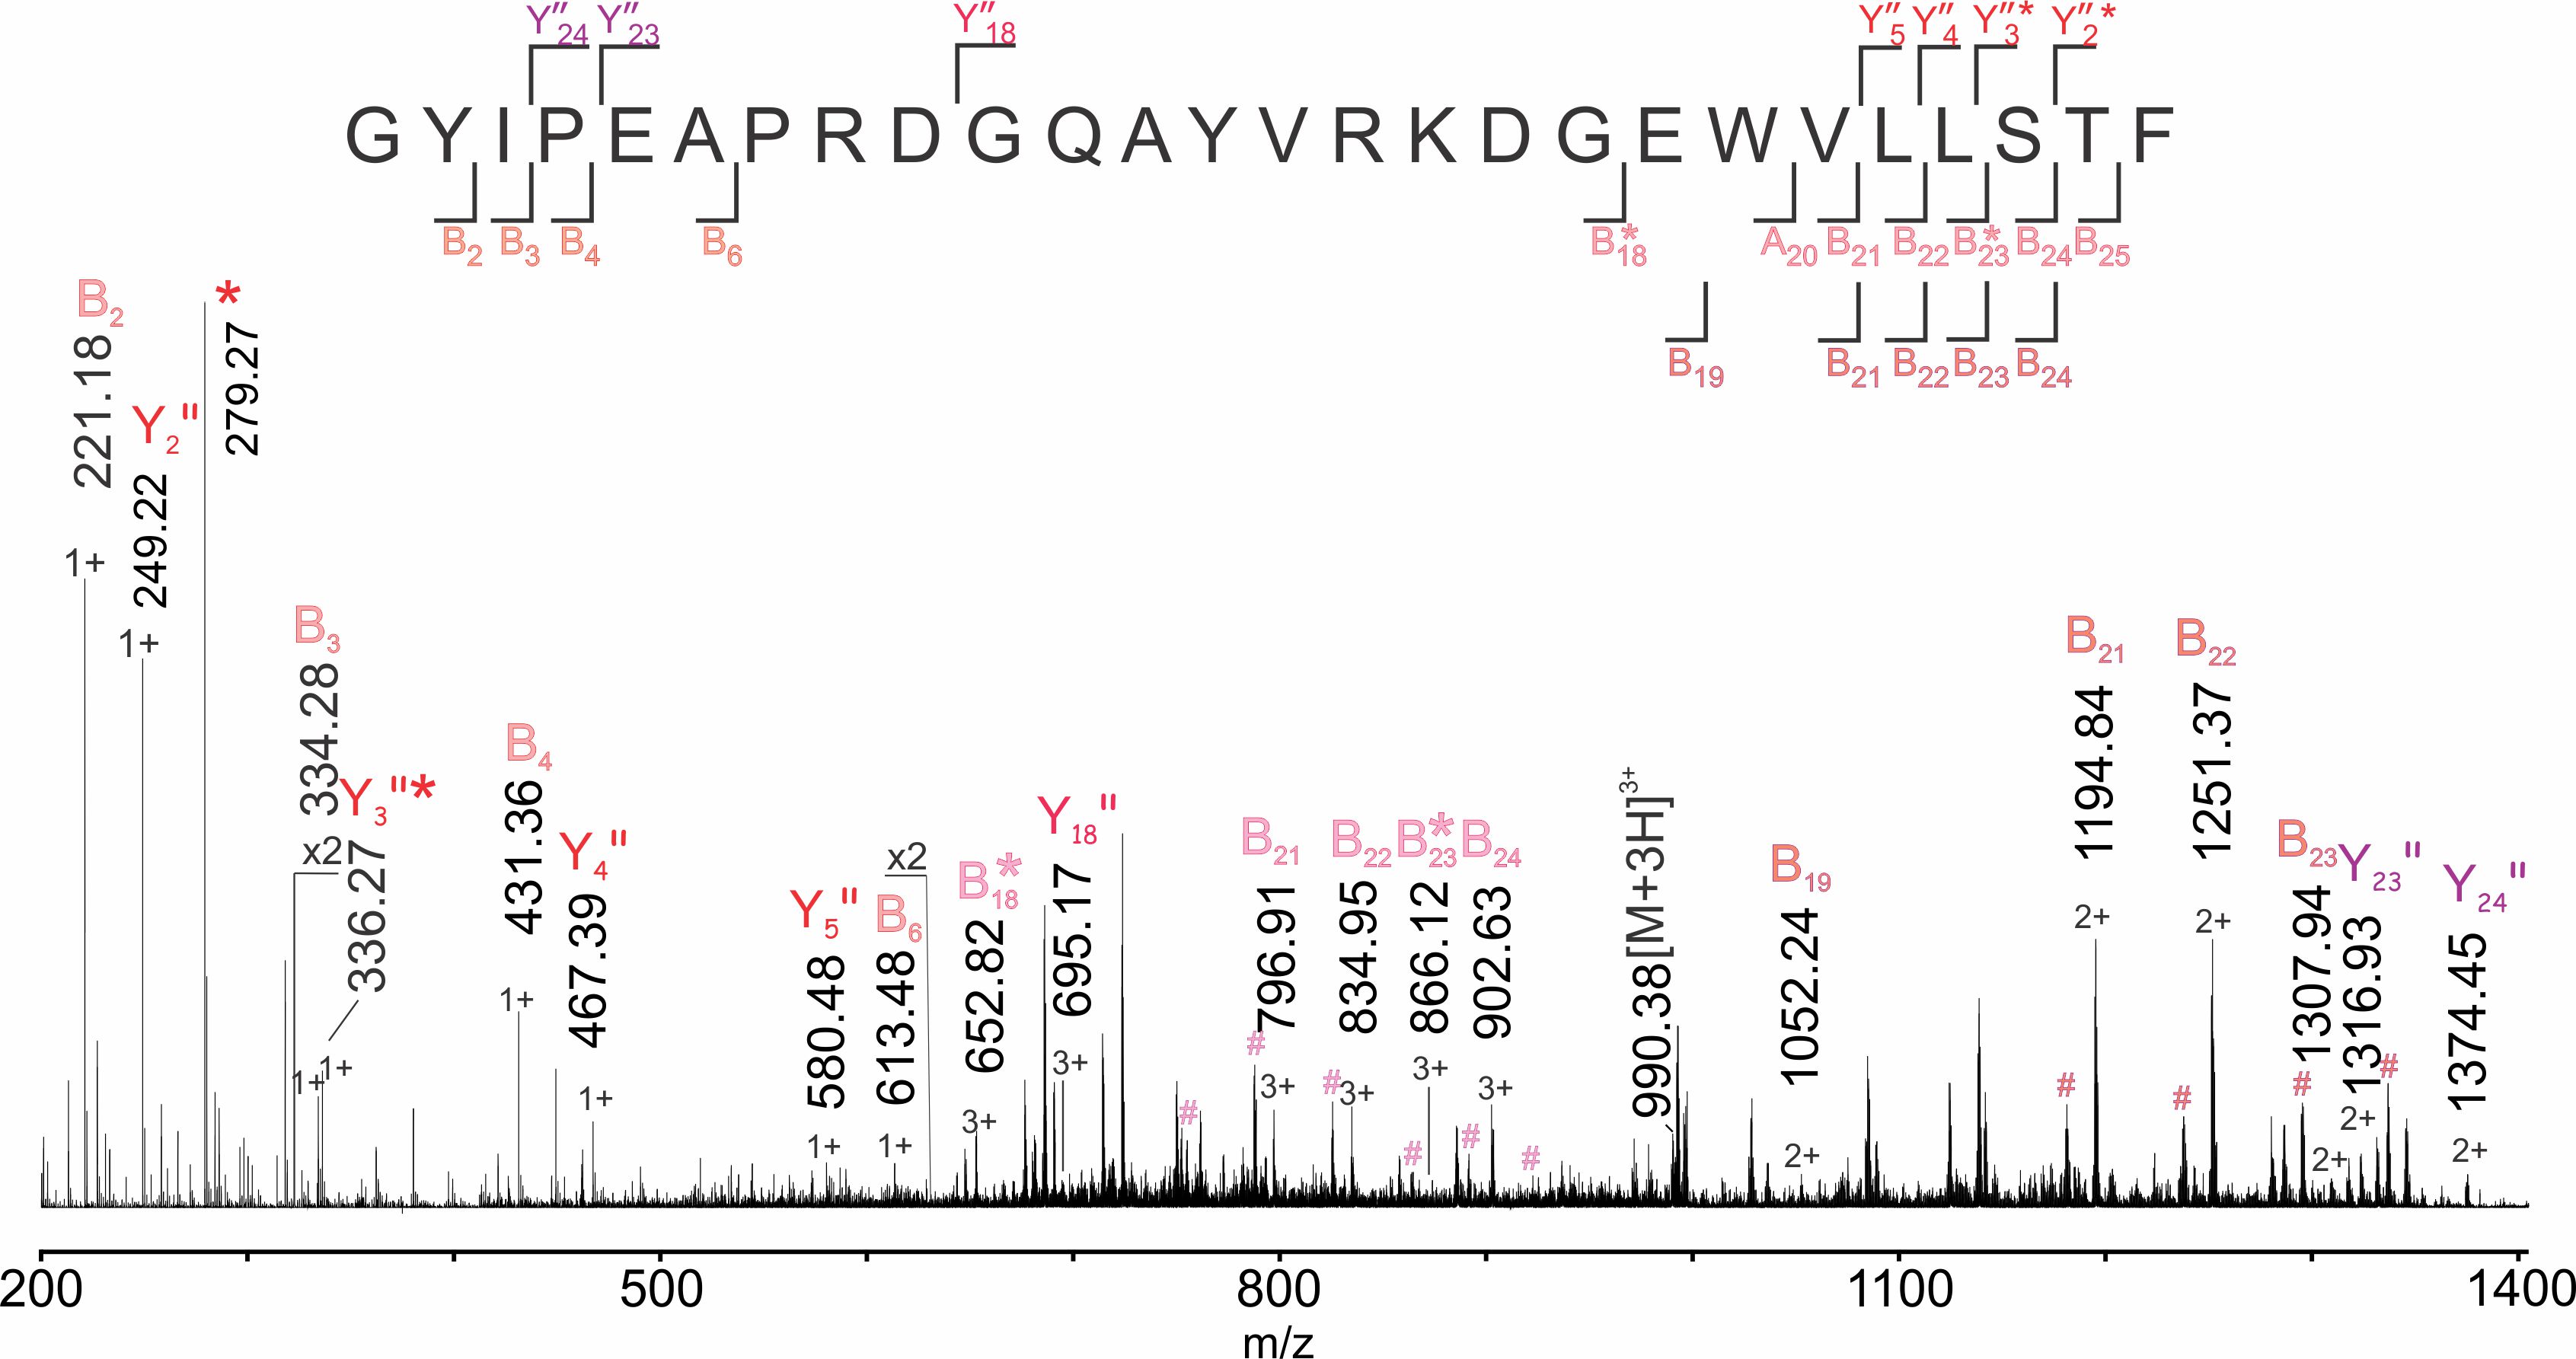


**Figure S2:** MS/MS spectrum of truncated foldon 0. The triply protonated molecular ion at *m/z* 990.38 served as precursor ion (cf. Figure 1). Selected ion signals are labeled. Y’’-type ions and B-type fragment ions are shown. # indicates A-type ions, * labels ion signals with loss of H2O. The insert shows the deduced amino acid sequence of the precursor in single letter code as well as locations of peptide bond breaks.


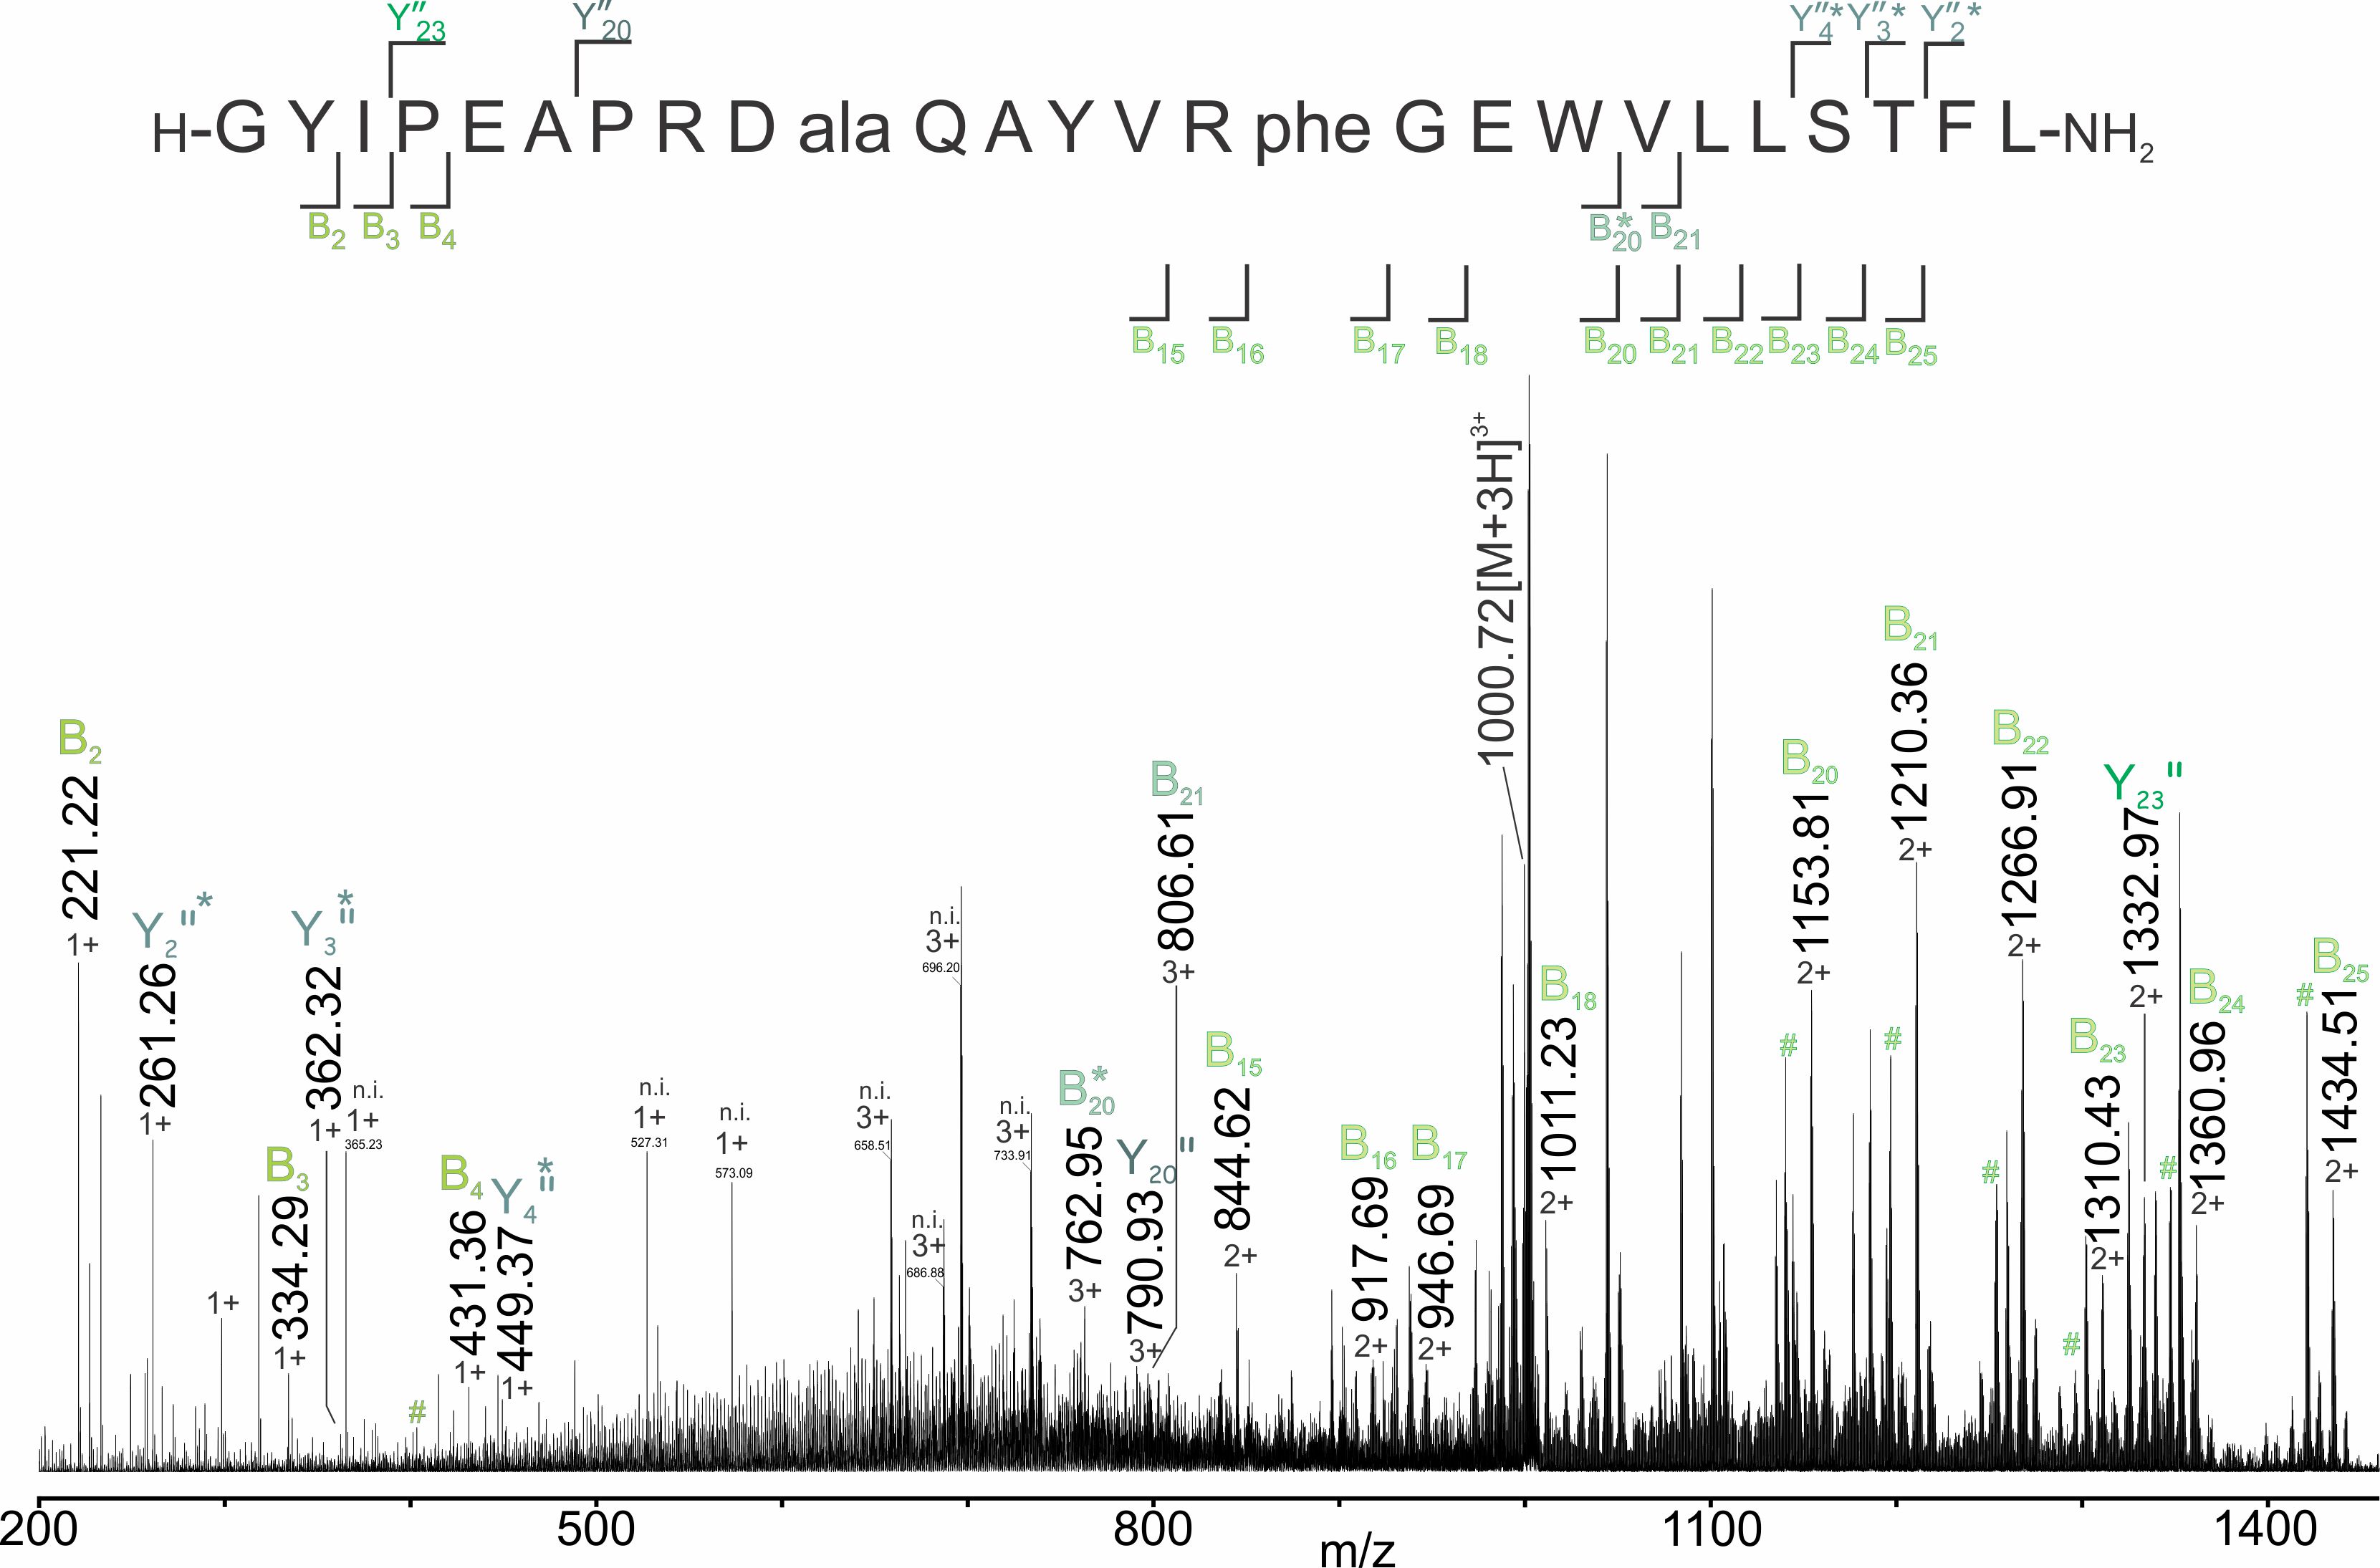


**Figure S3:** MS/MS spectrum of truncated foldon 1. The triply protonated molecular ion at *m/z* 1000.72 served as precursor ion (cf. Figure 1). Selected ion signals are labeled. Y’’-type ions and B-type fragment ions are shown. # indicates A-type ions, * labels ion signals with loss of H2O, n.i.: not identified. The insert shows the deduced amino acid sequence of the precursor in single letter code as well as locations of peptide bond breaks.


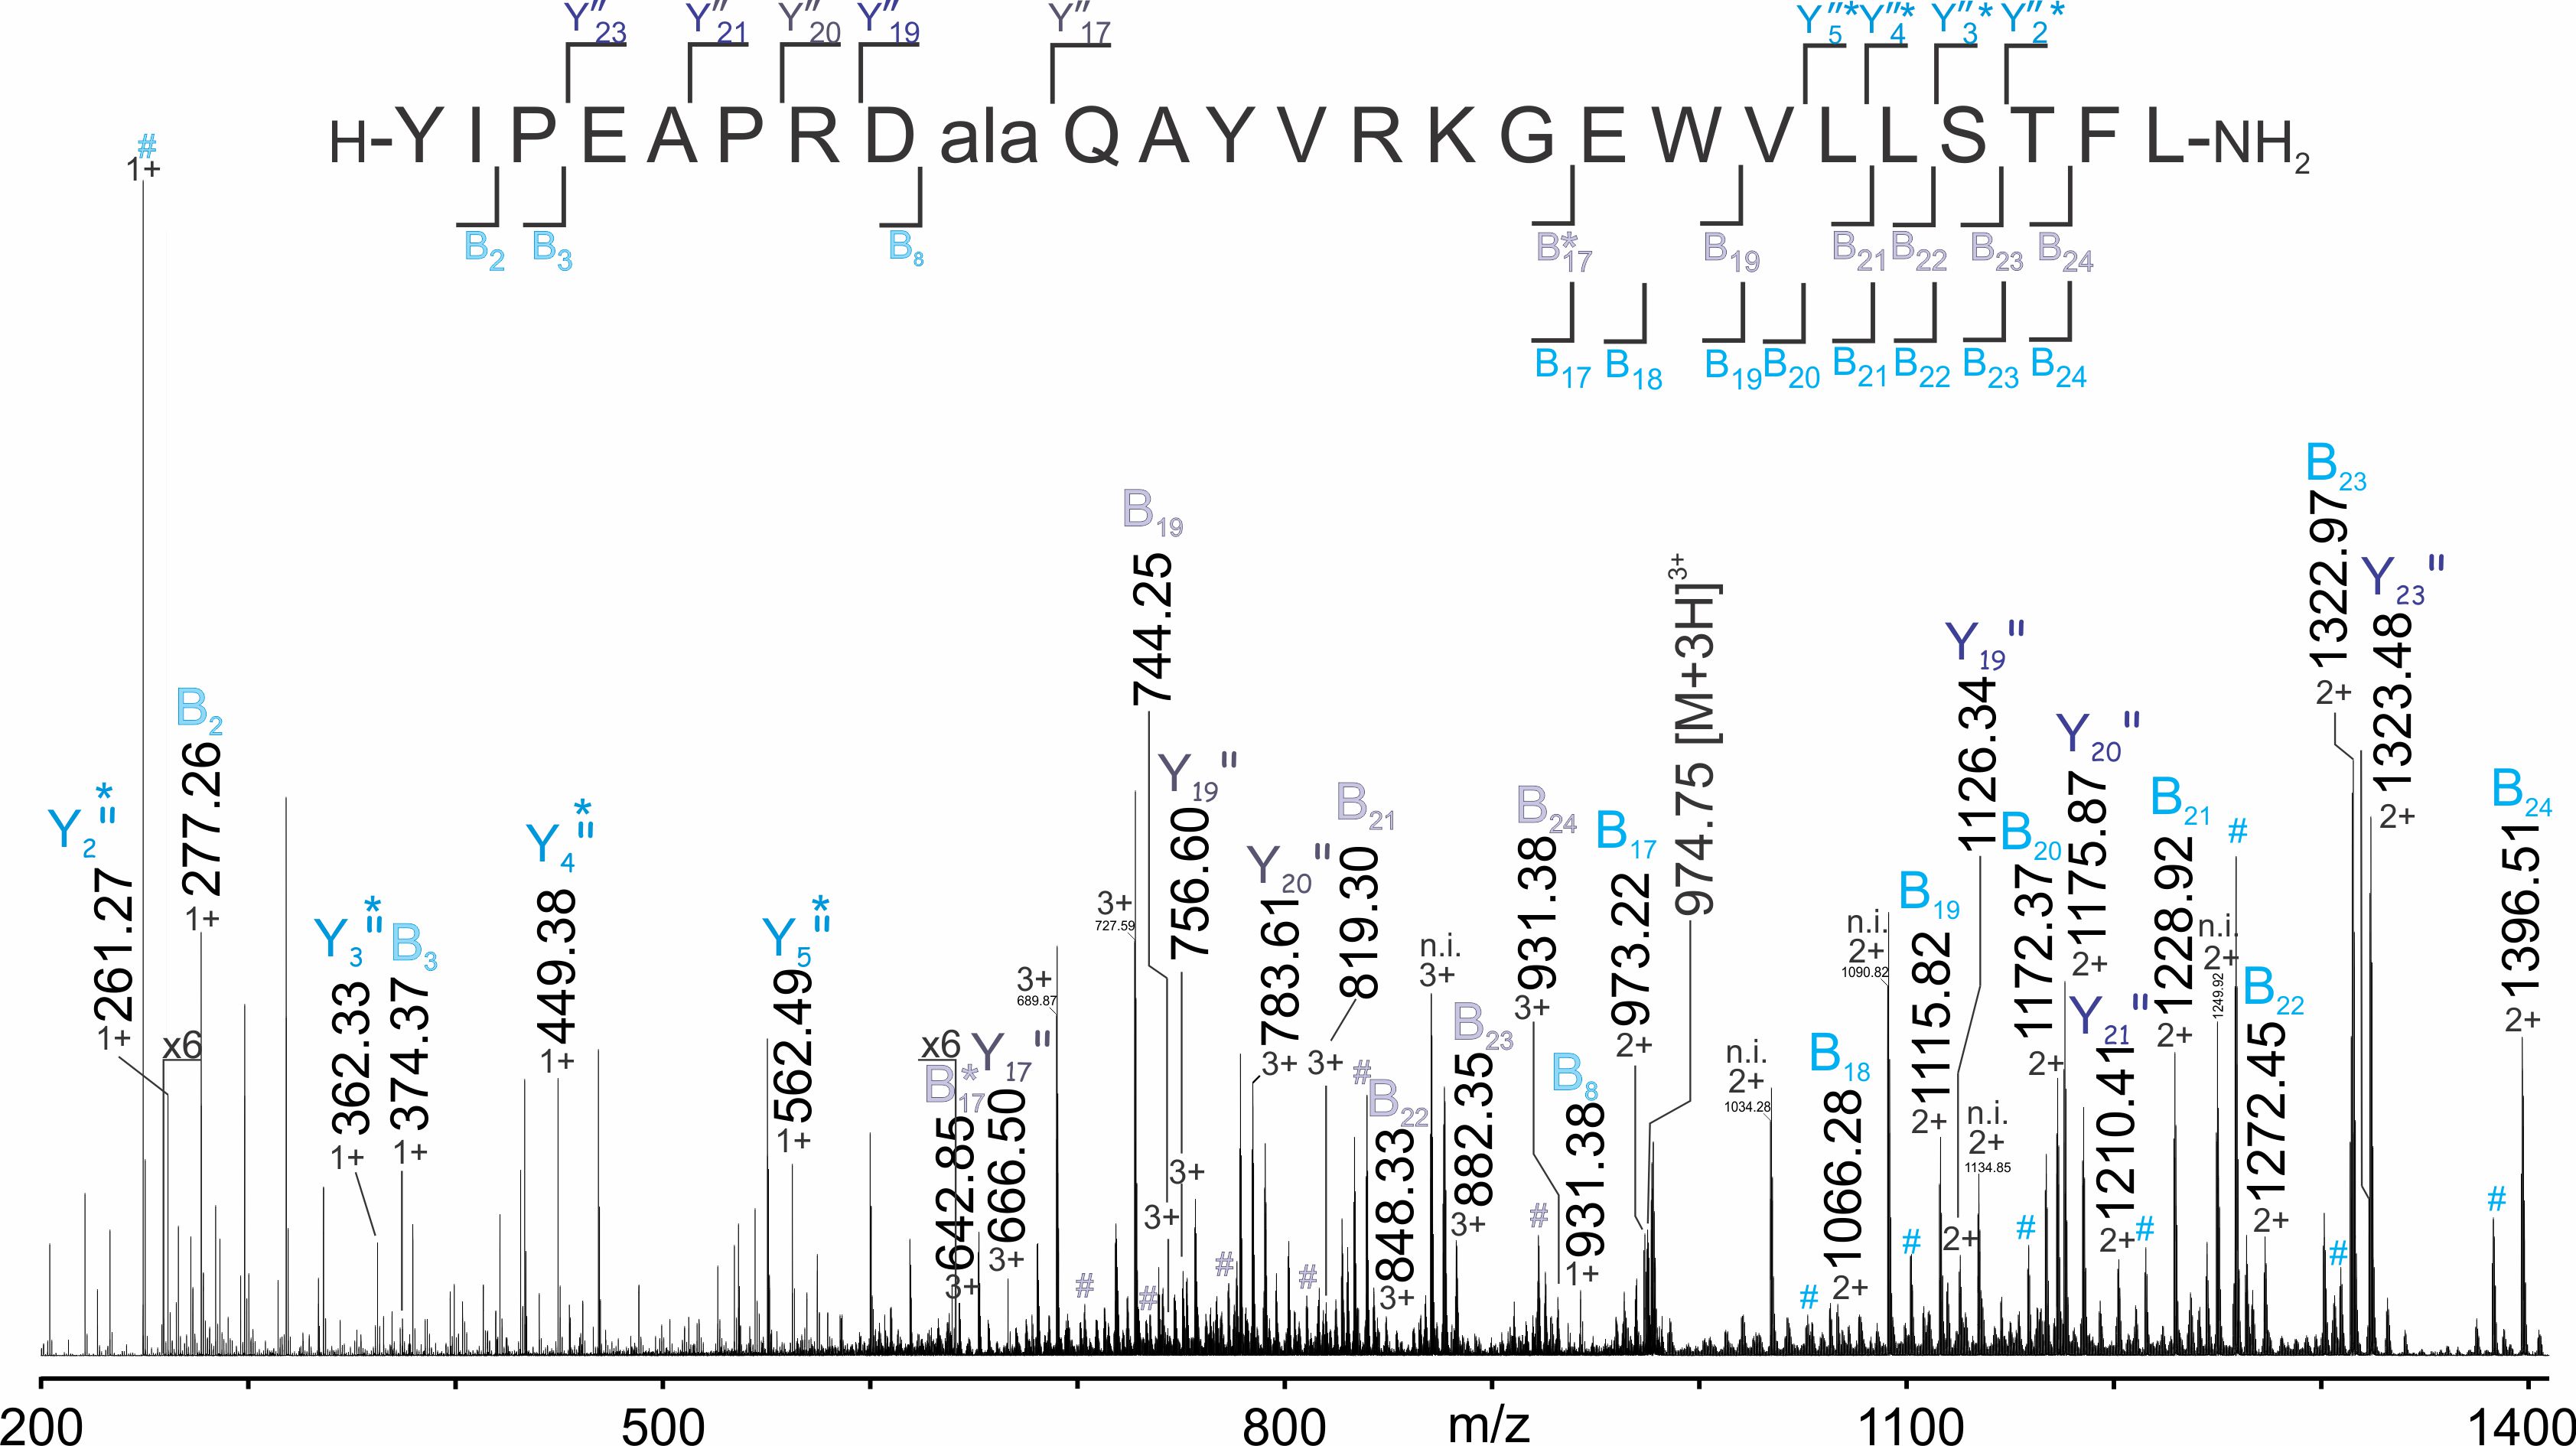


**Figure S4:** MS/MS spectrum of truncated foldon 3. The triply protonated molecular ion at *m/z* 974.75 served as precursor ion (cf. Figure 1). Selected ion signals are labeled. Y’’-type ions and B-type fragment ions are shown. # indicates A-type ions, * labels ion signals with loss of H2O, n.i.: not identified. The insert shows the deduced amino acid sequence of the precursor in single letter code as well as locations of peptide bond breaks.


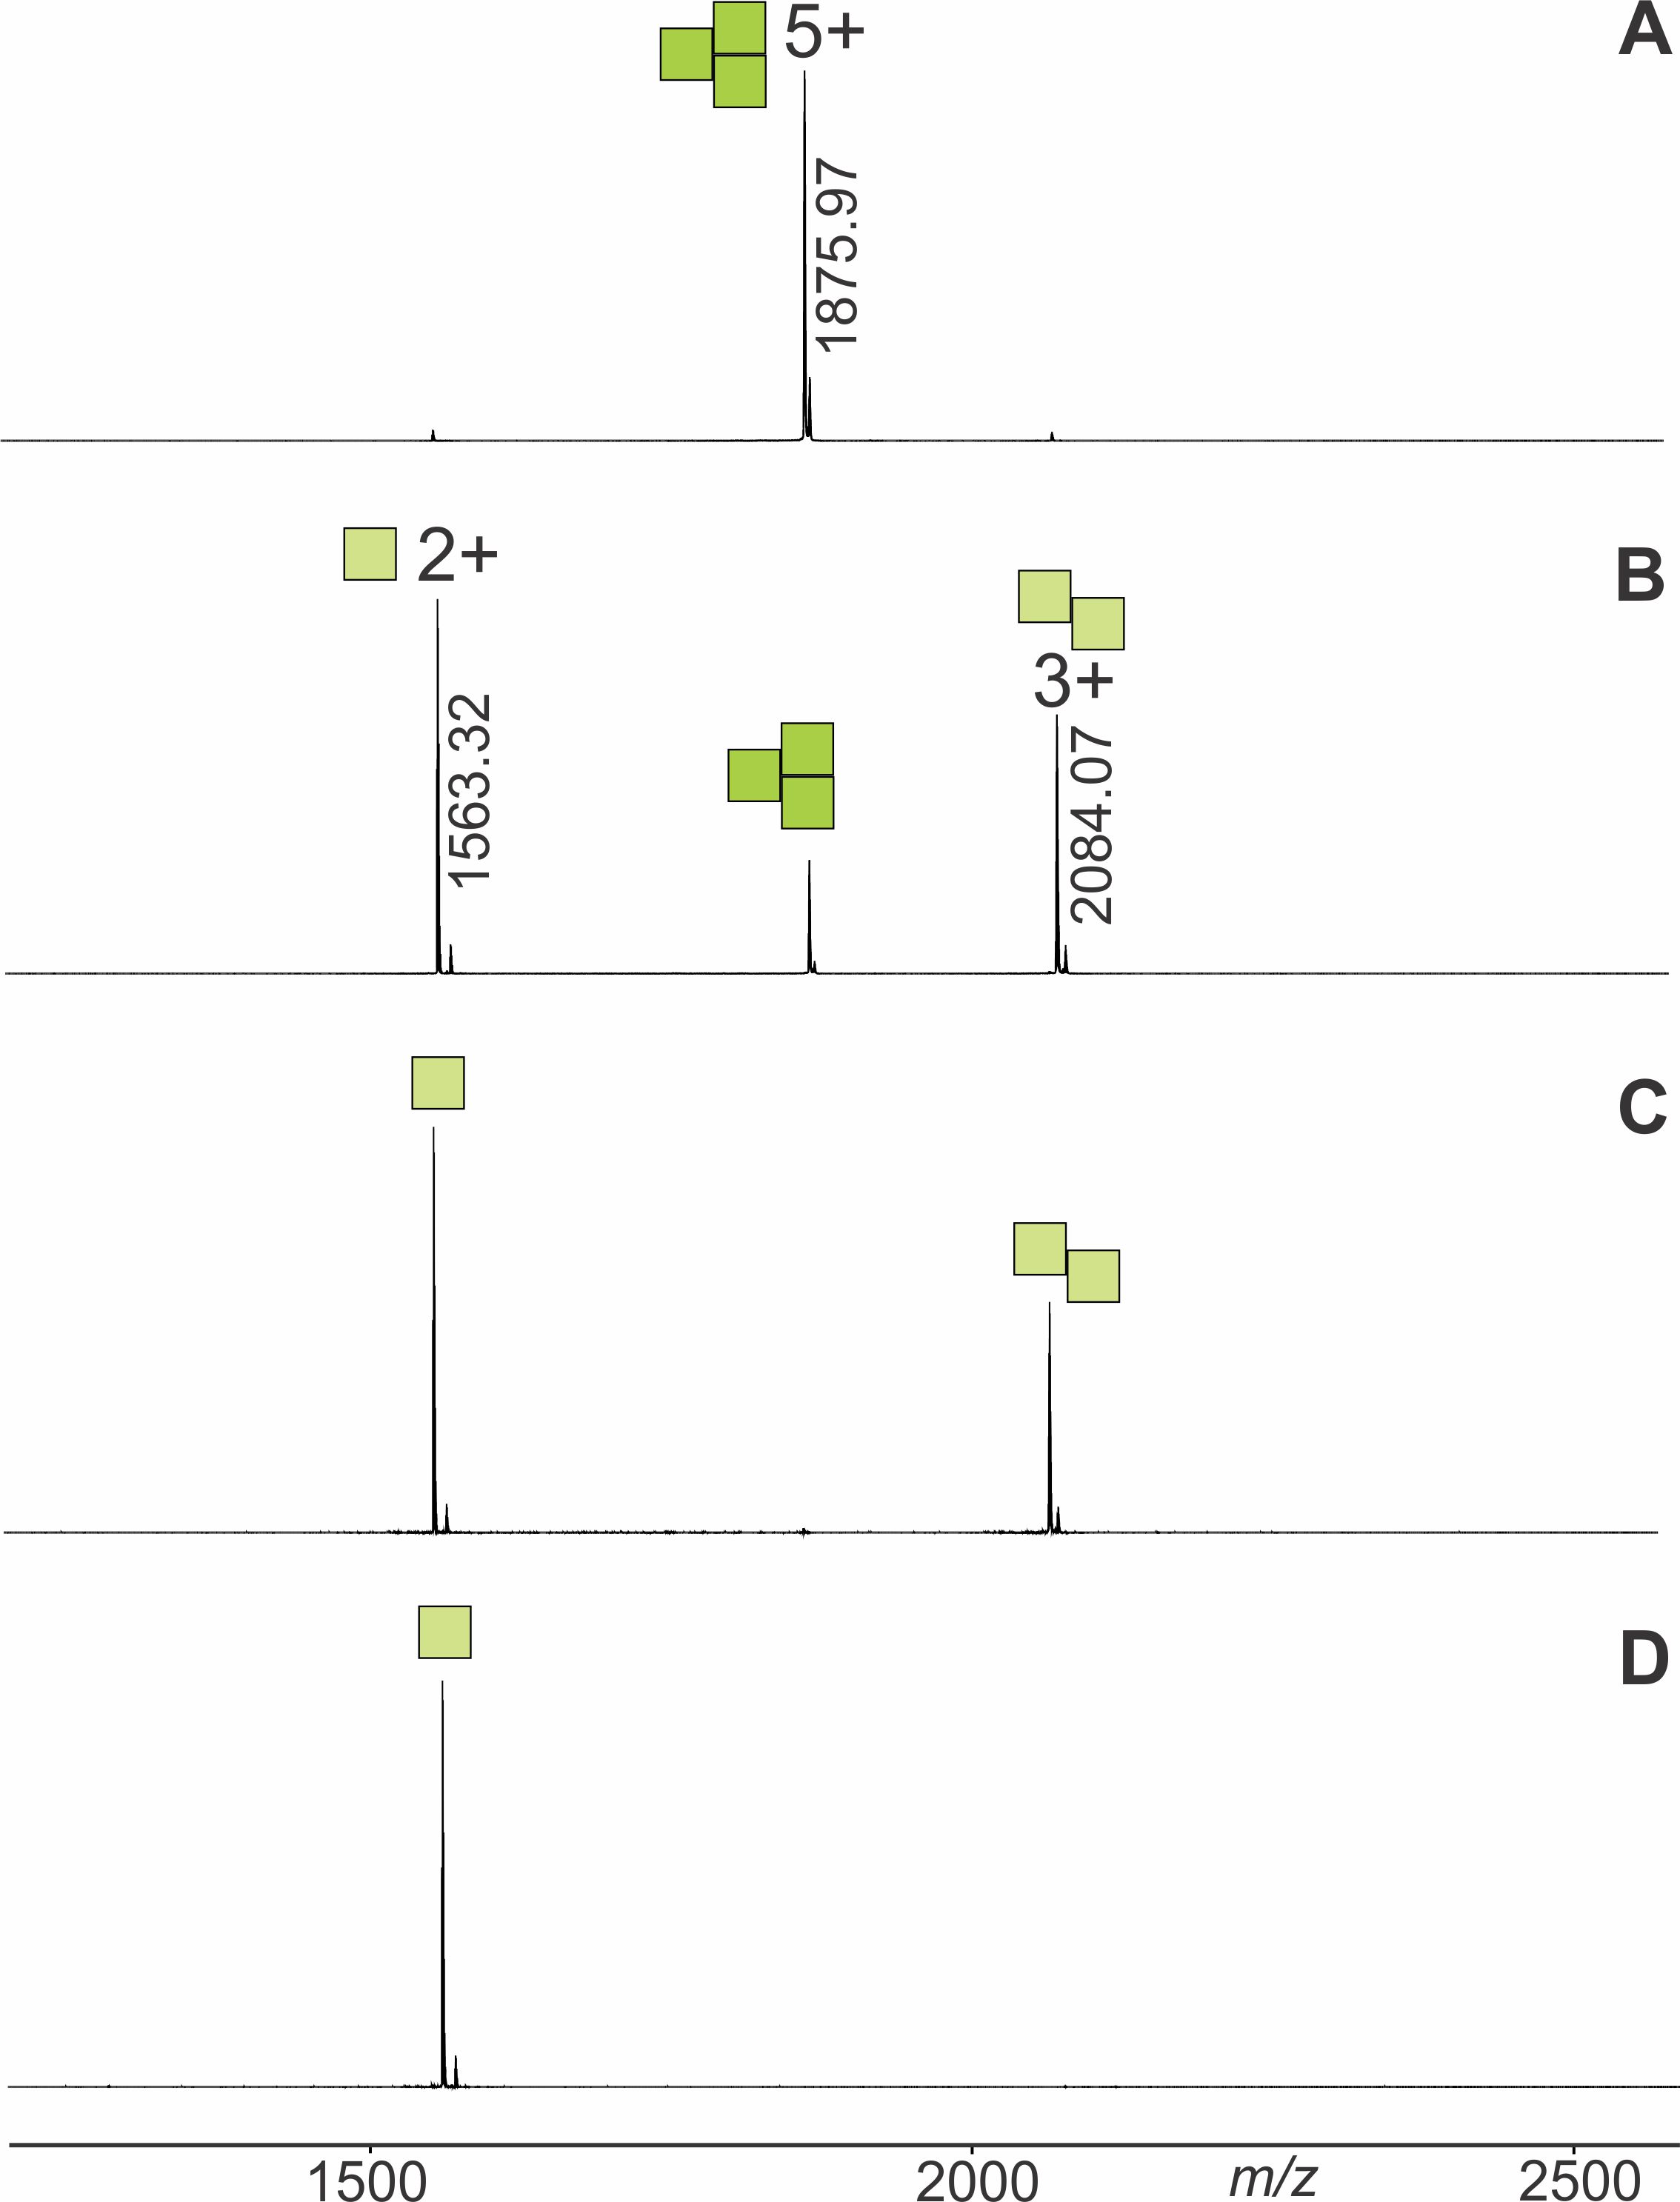


**Figure S5:** Nano-ESI mass spectra of foldon 1 with increasing collision cell voltage differences (∆CV). **A:** 0 V, **B:** 15 V, **C:** 20 V, **D:** 40 V. Charge states and *m/z* values of ion signals are given. The quadrupole was set to isolate the 5+ trimer ion. Symbols indicate multimeric states. Solvent: 50 mM ammonium acetate, pH 5.5.


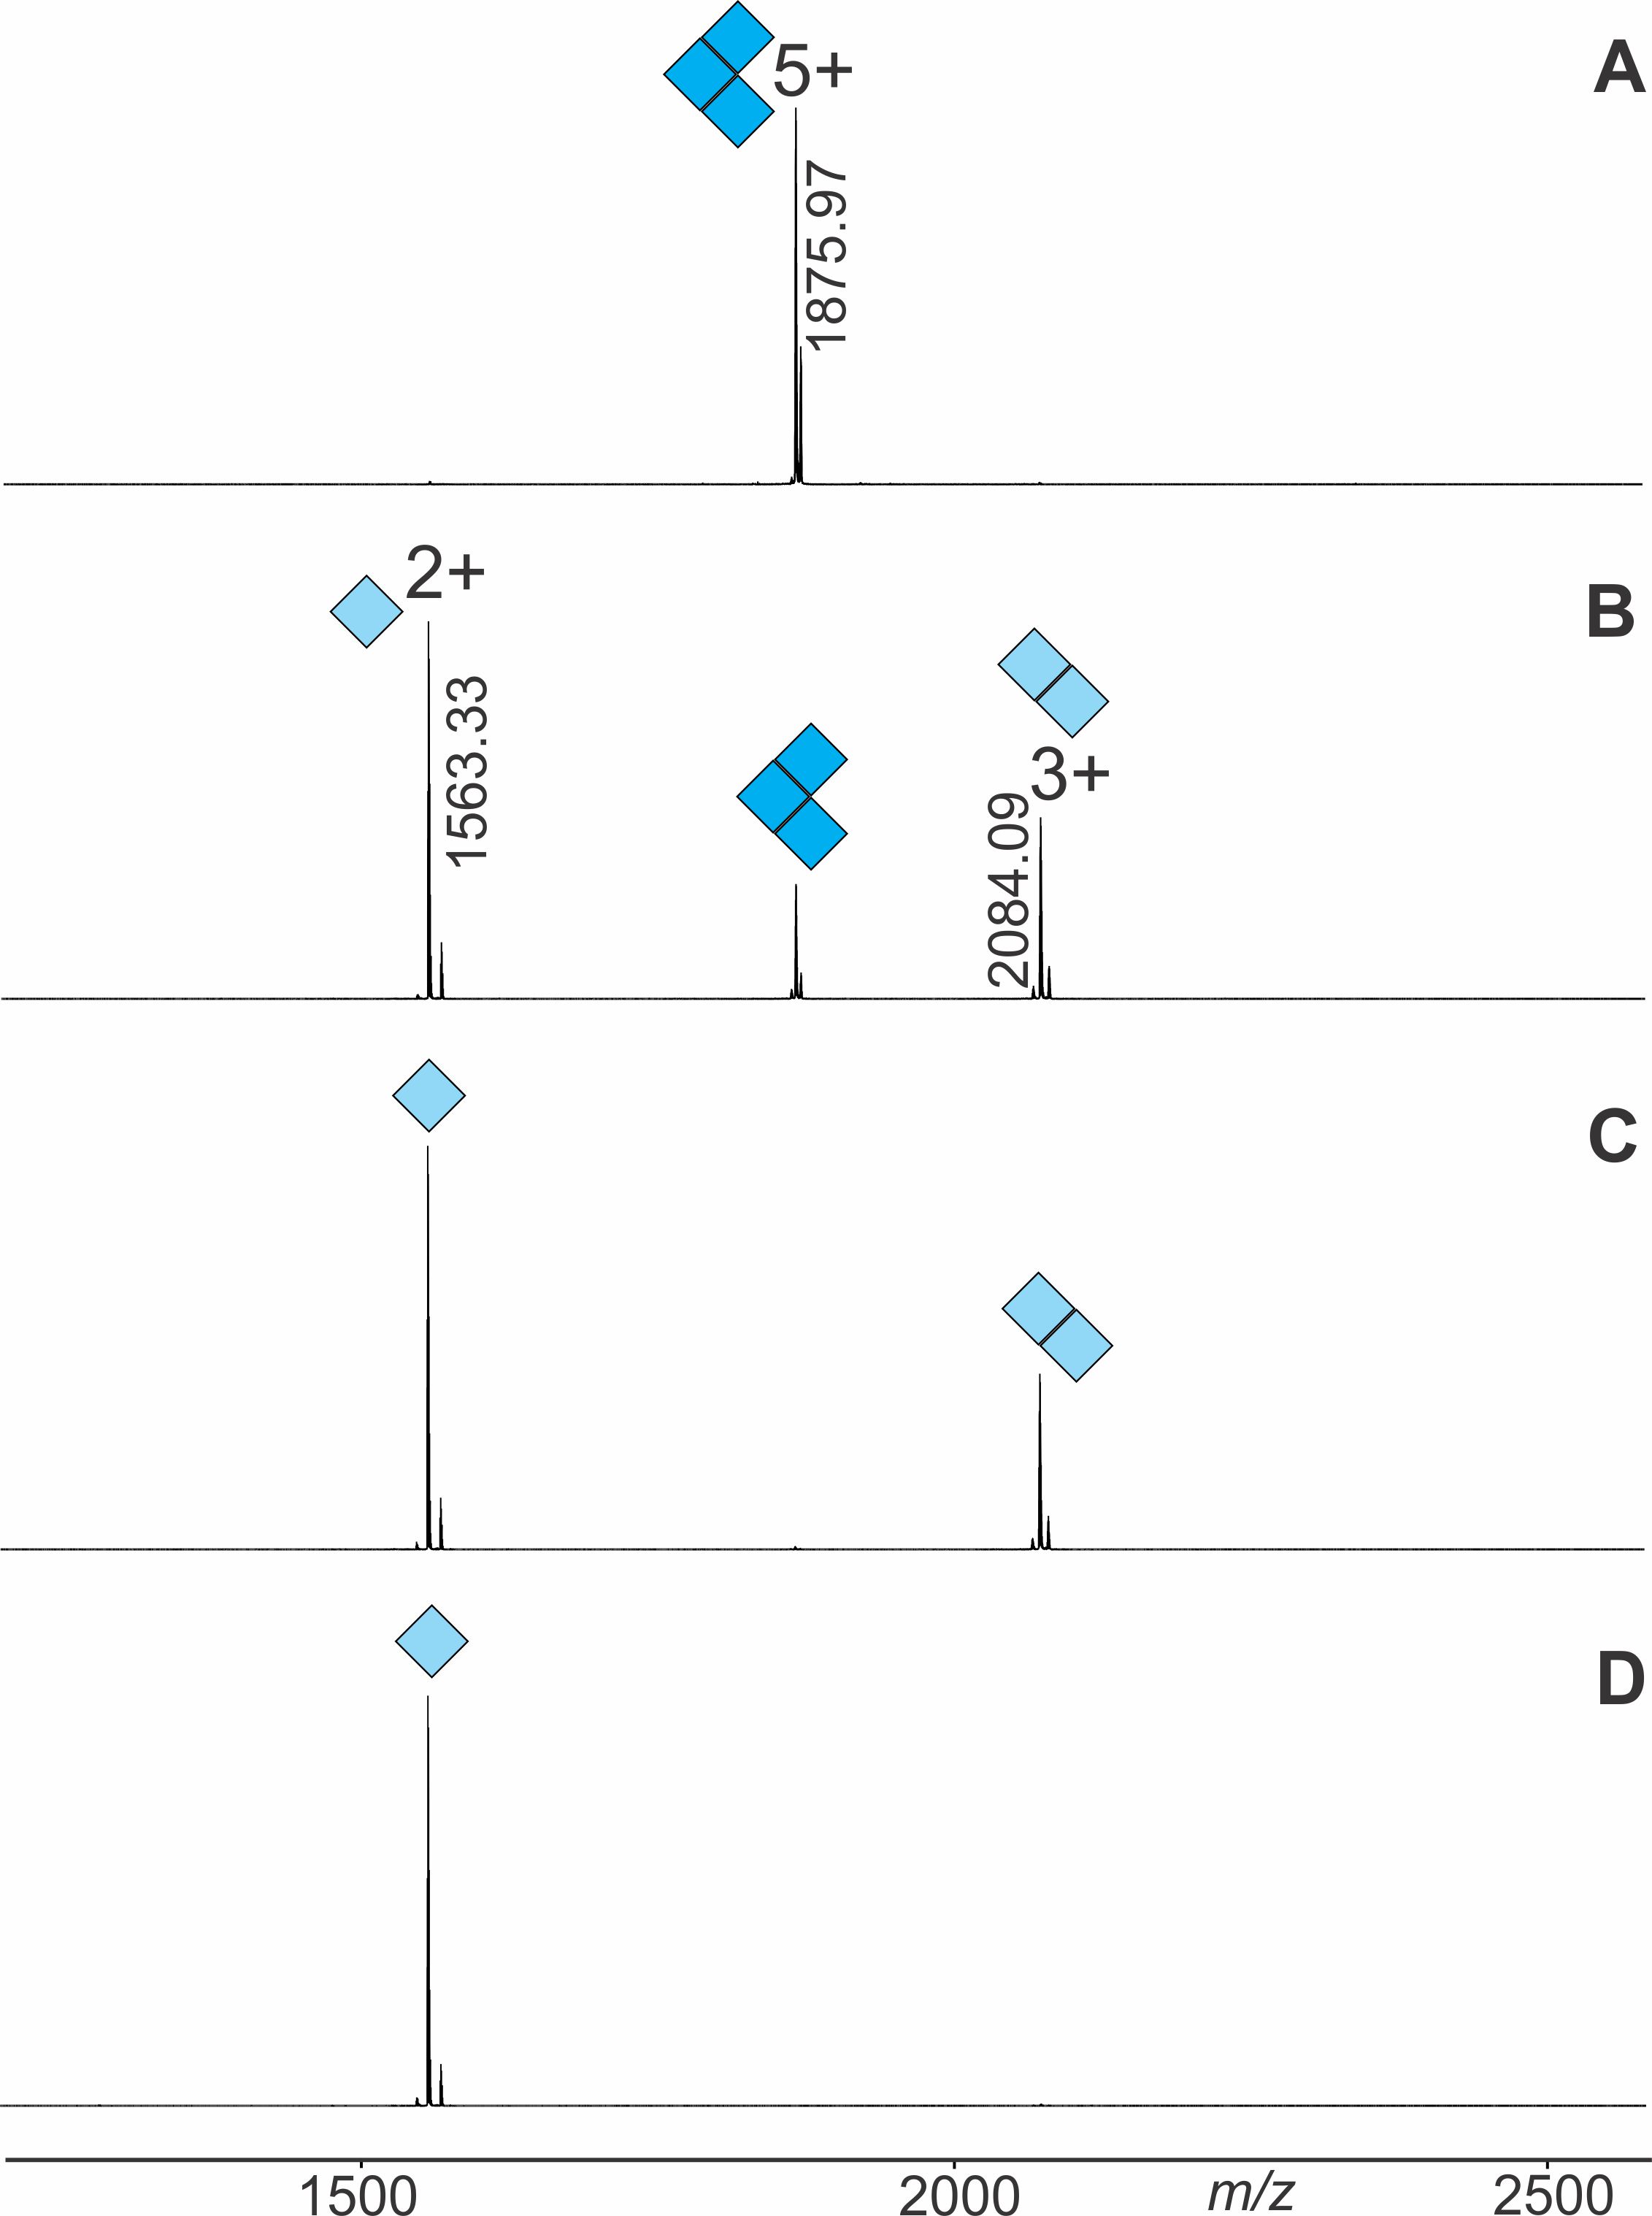


**Figure S6:** Nano-ESI mass spectra of foldon 2 with increasing collision cell voltage differences (∆CV). **A:** 0 V, **B:** 15 V, **C:** 20 V, **D:** 40 V. Charge states and *m/z* values of ion signals are given. The quadrupole was set to isolate the 5+ trimer ion. Symbols indicate multimeric states. Solvent: 50 mM ammonium acetate, pH 5.5.


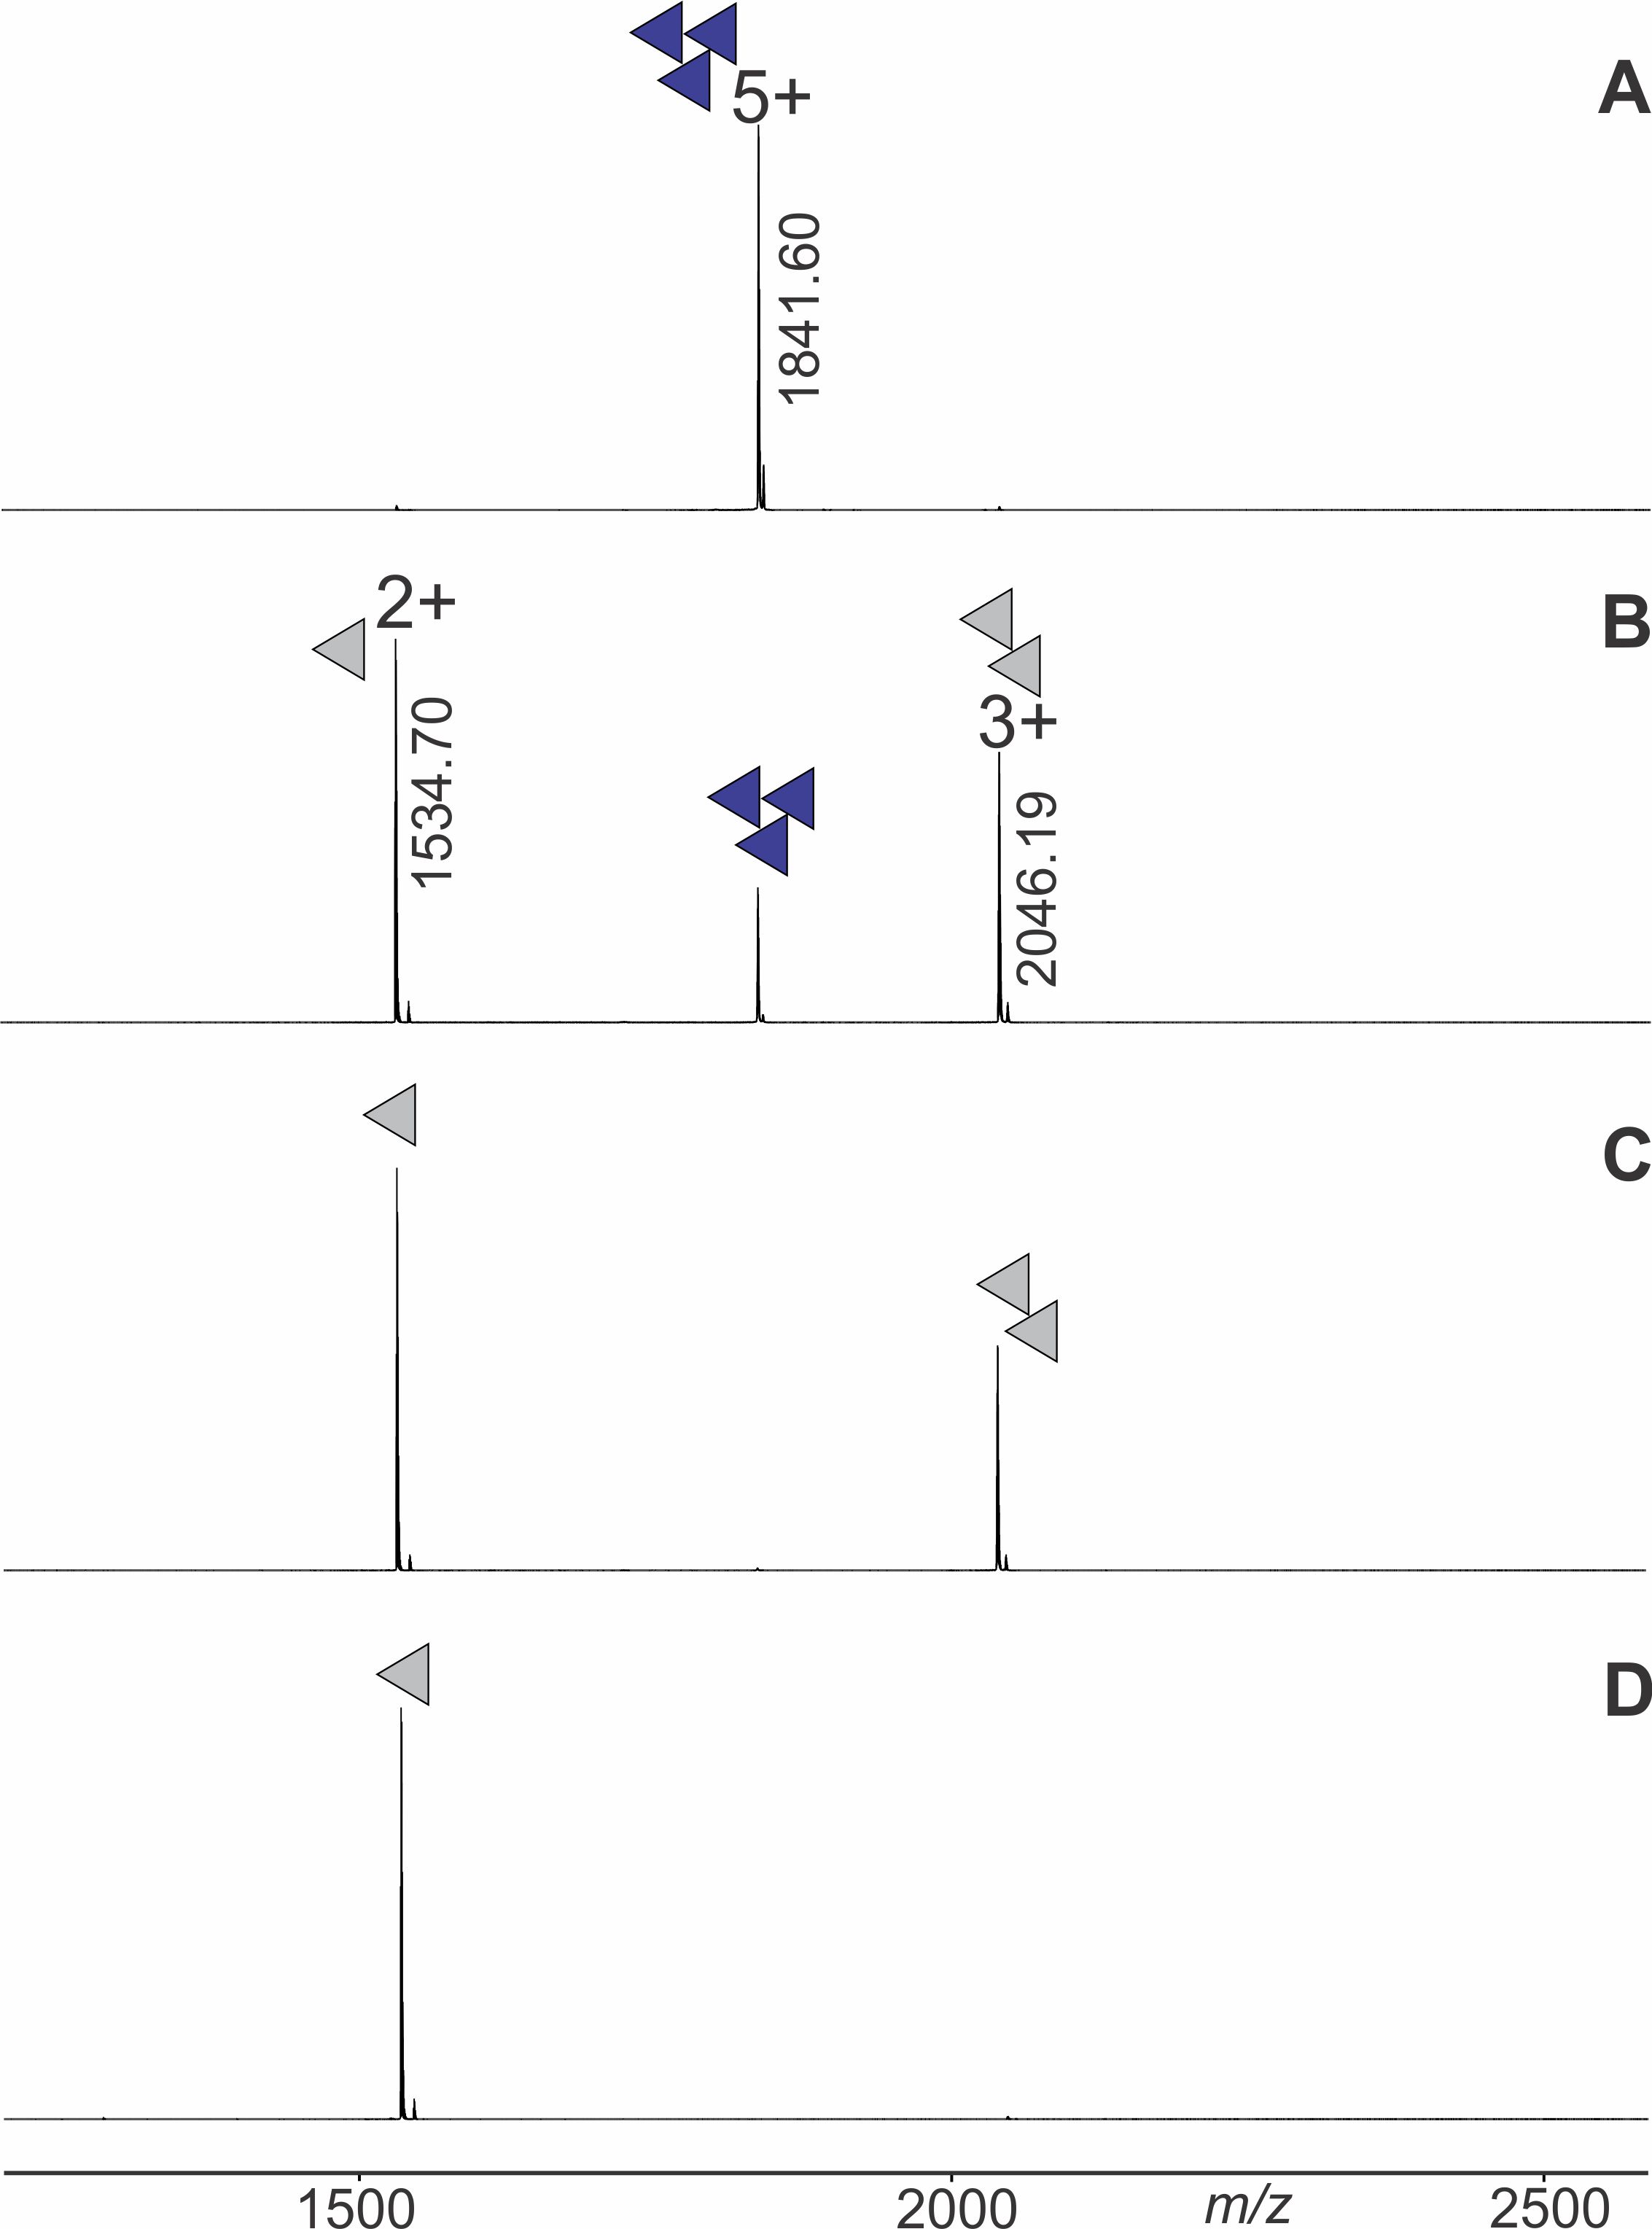


**Figure S7:** Nano-ESI mass spectra of foldon 3 with increasing collision cell voltage differences (∆CV). **A:** 0 V, **B:** 15 V, **C:** 20 V, **D:** 30 V. Charge states and *m/z* values of ion signals are given. The quadrupole was set to isolate the 5+ trimer ion. Symbols indicate multimeric states. Solvent: 50 mM ammonium acetate, pH 5.5.


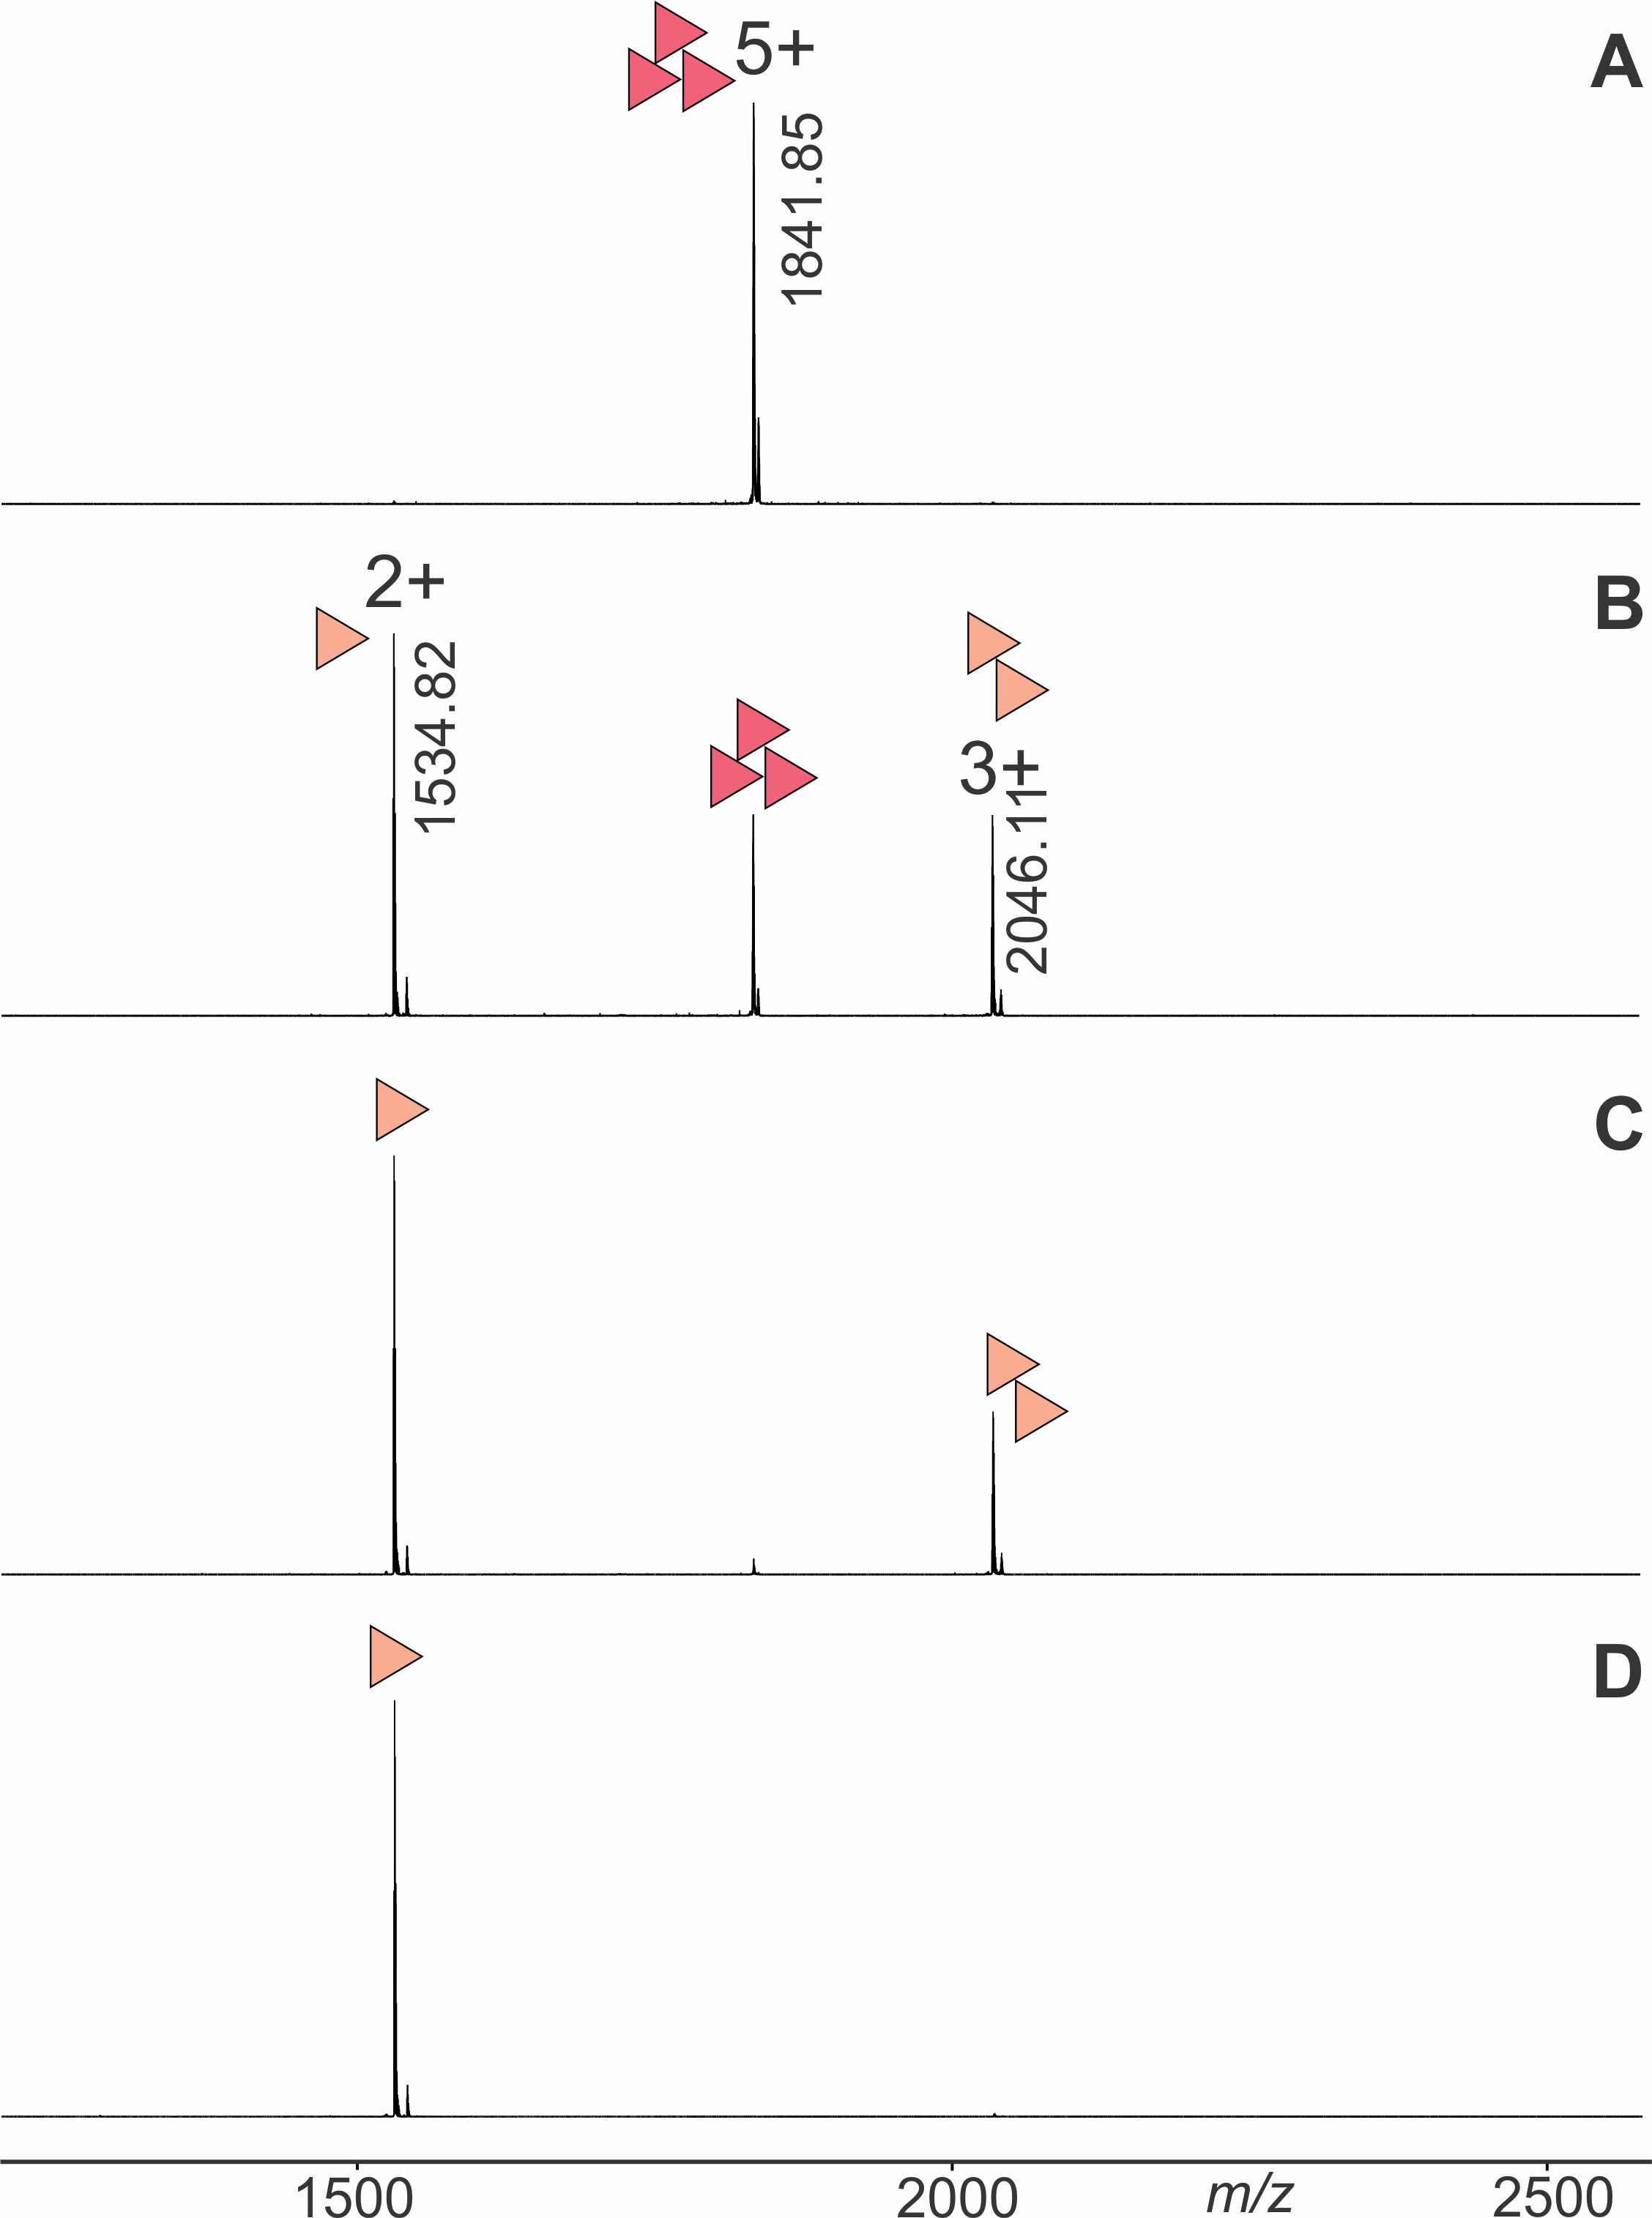


**Figure S8:** Nano-ESI mass spectra of foldon 4 with increasing collision cell voltage differences (∆CV). **A:** 2 V, **B:** 15 V, **C:** 20 V, **D:** 40 V. Charge states and *m/z* values of ion signals are given. The quadrupole was set to isolate the 5+ trimer ion. Symbols indicate multimeric states. Solvent: 50 mM ammonium acetate, pH 5.5.


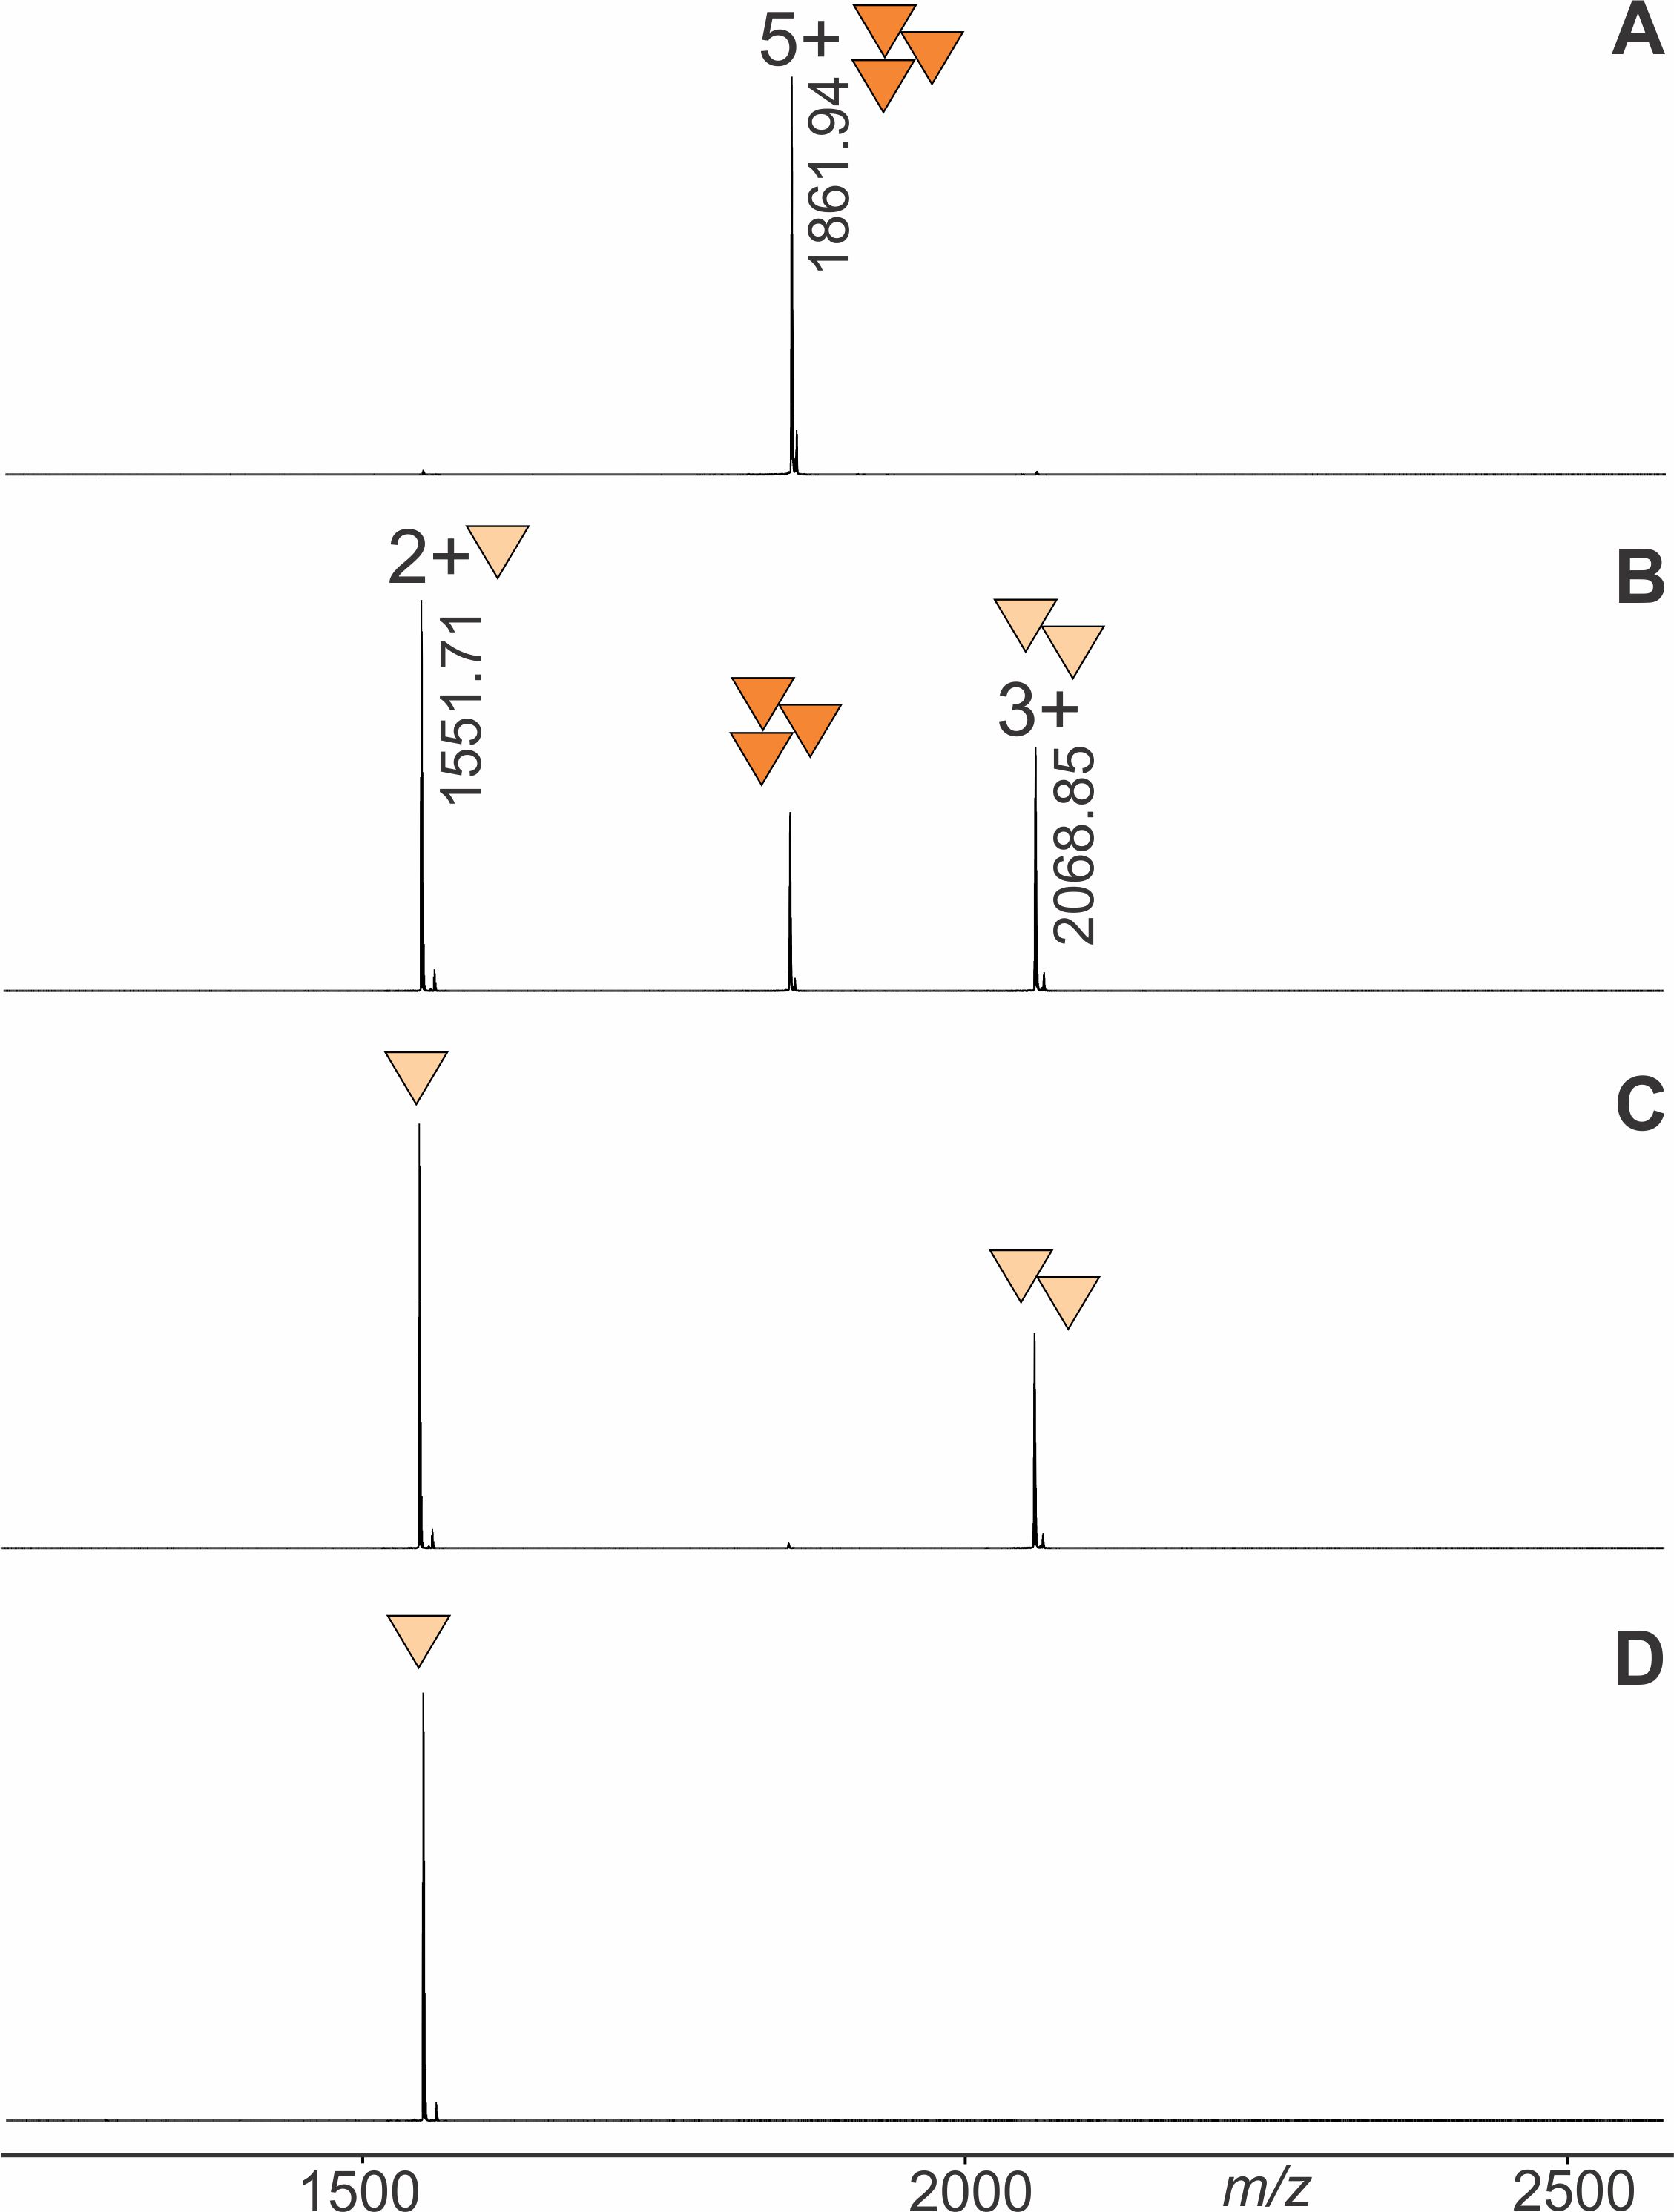


**Figure S9:** Nano-ESI mass spectra of foldon 5 with increasing collision cell voltage differences (∆CV). **A:** 2 V, **B:** 15 V, **C:** 20 V, **D:** 40 V. Charge states and *m/z* values of ion signals are given. The quadrupole was set to isolate the 5+ trimer ion. Symbols indicate multimeric states. Solvent: 50 mM ammonium acetate, pH 5.5.


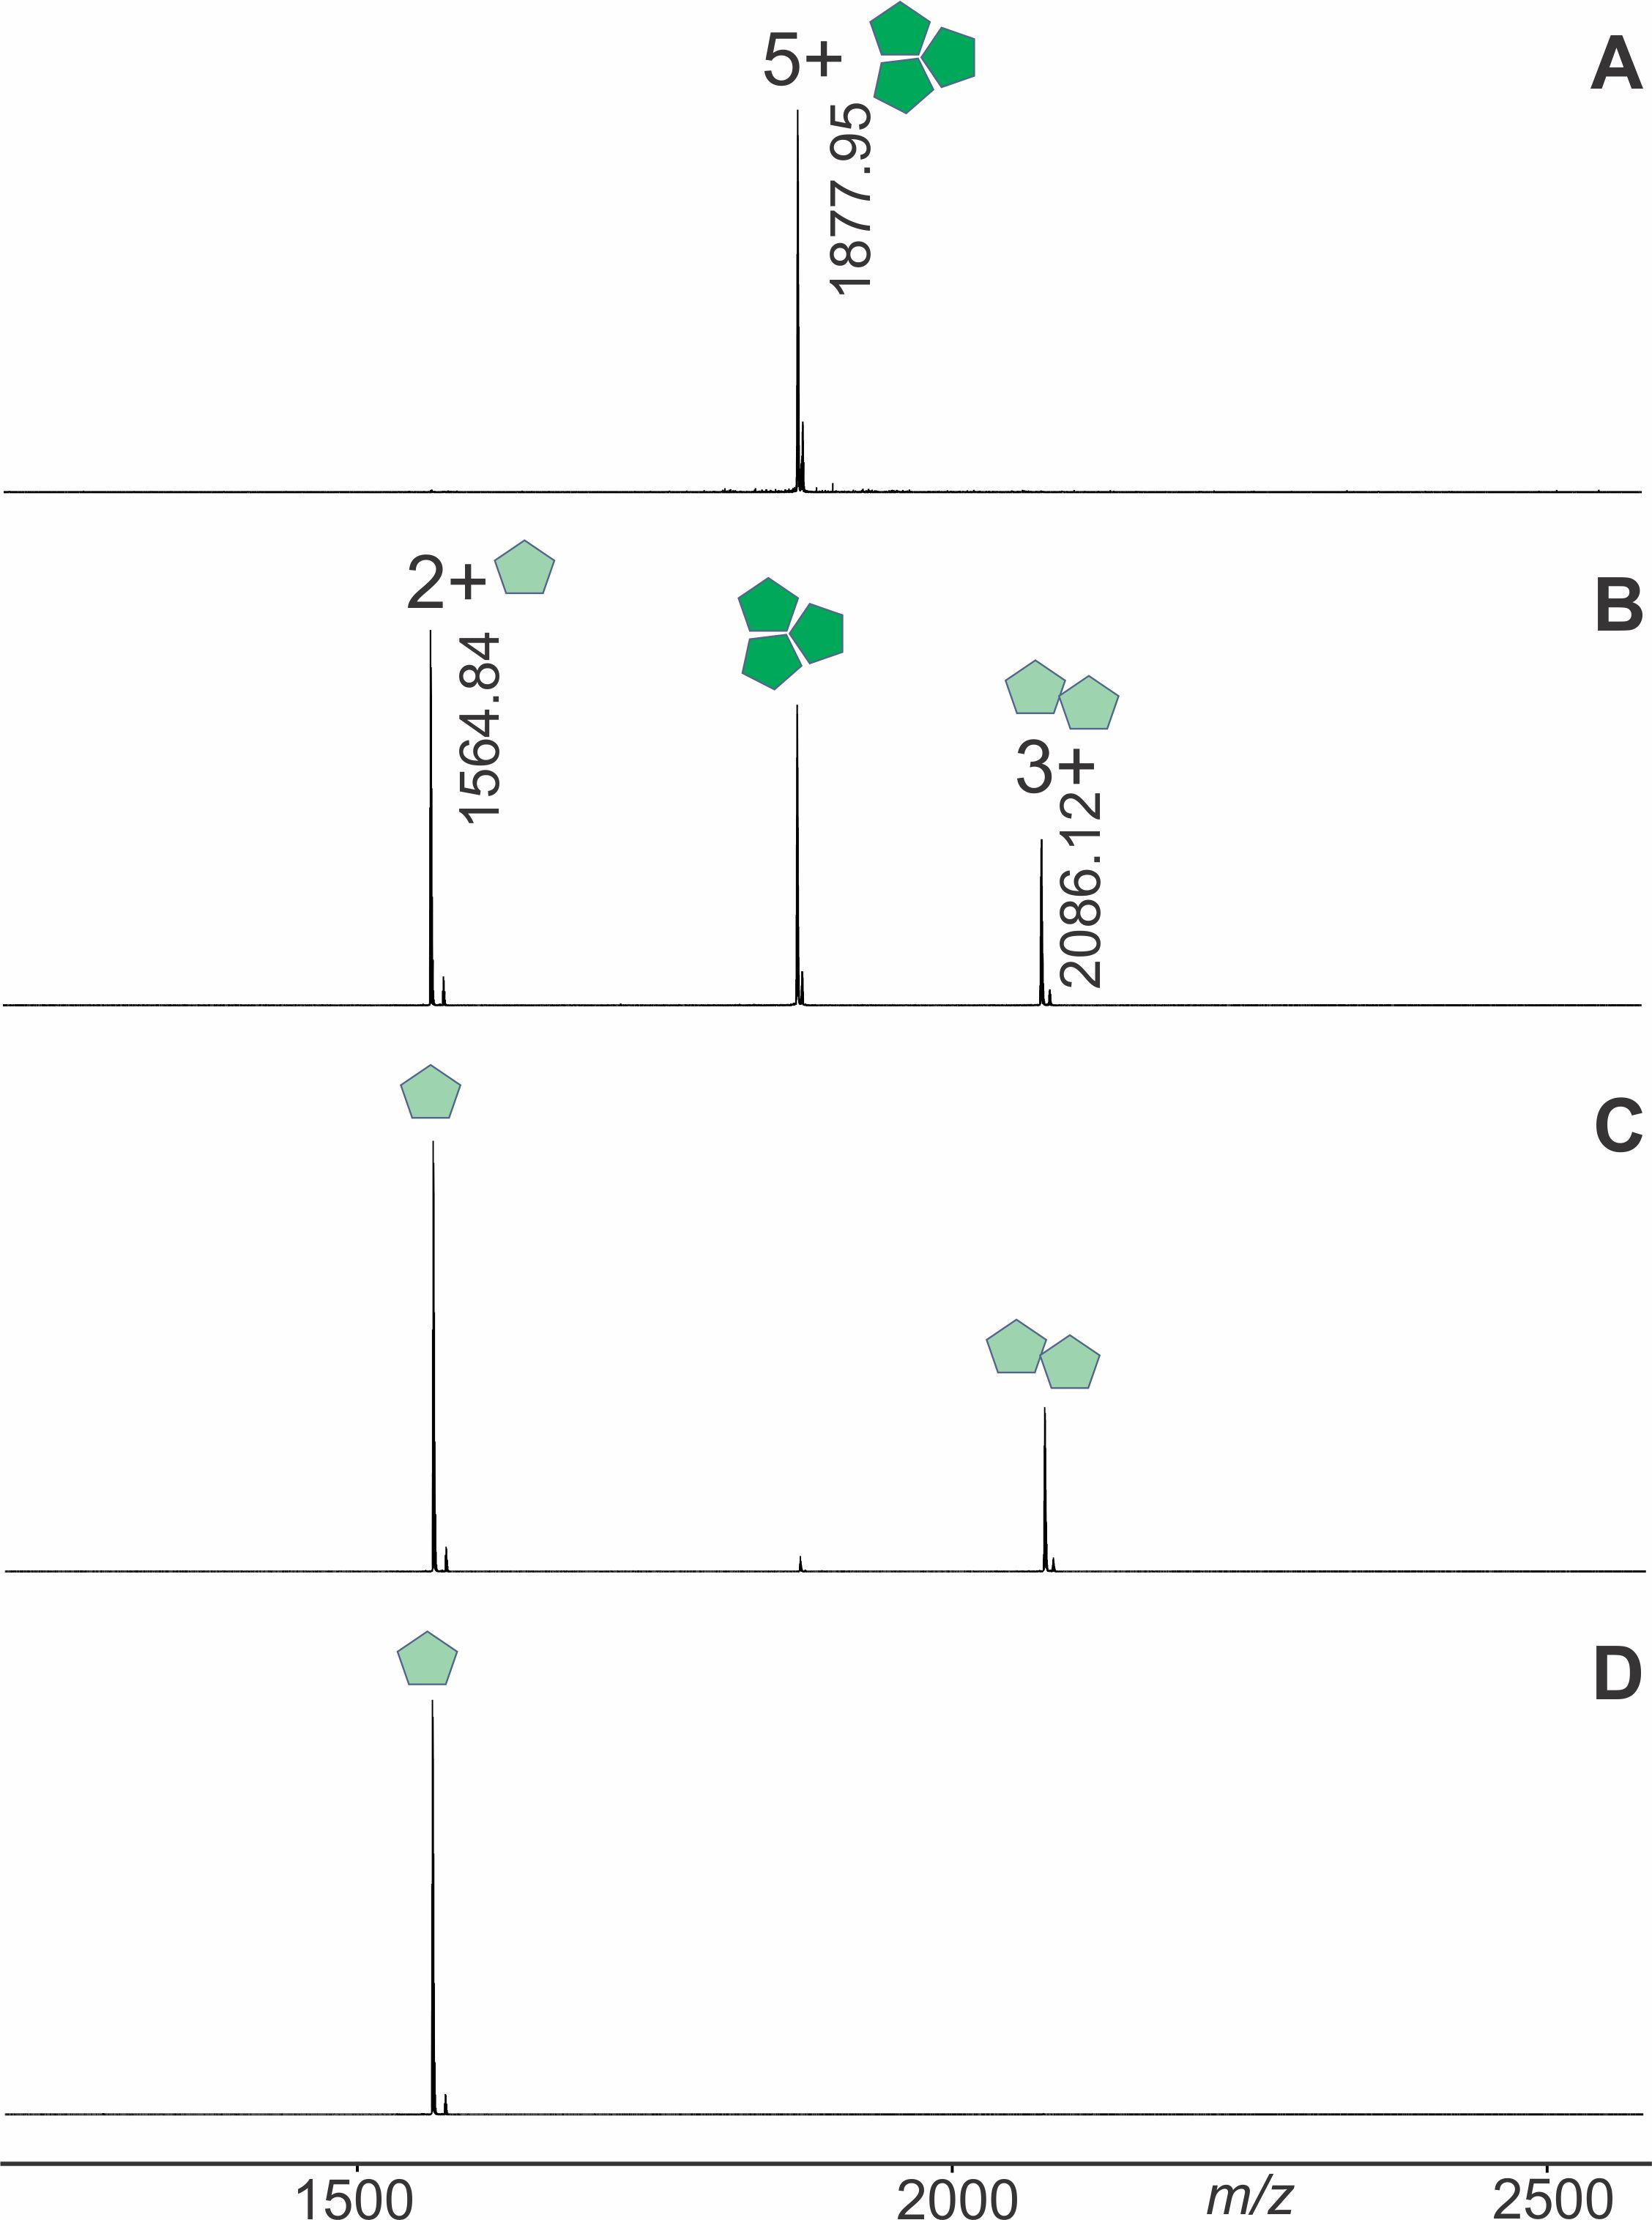


**Figure S10:** Nano-ESI mass spectra of foldon 6 with increasing collision cell voltage differences (∆CV). **A:** 2 V, **B:** 15 V, **C:** 20 V, **D:** 40 V. Charge states and *m/z* values of ion signals are given. The quadrupole was set to isolate the 5+ trimer ion. Symbols indicate multimeric states. Solvent: 50 mM ammonium acetate, pH 5.5.


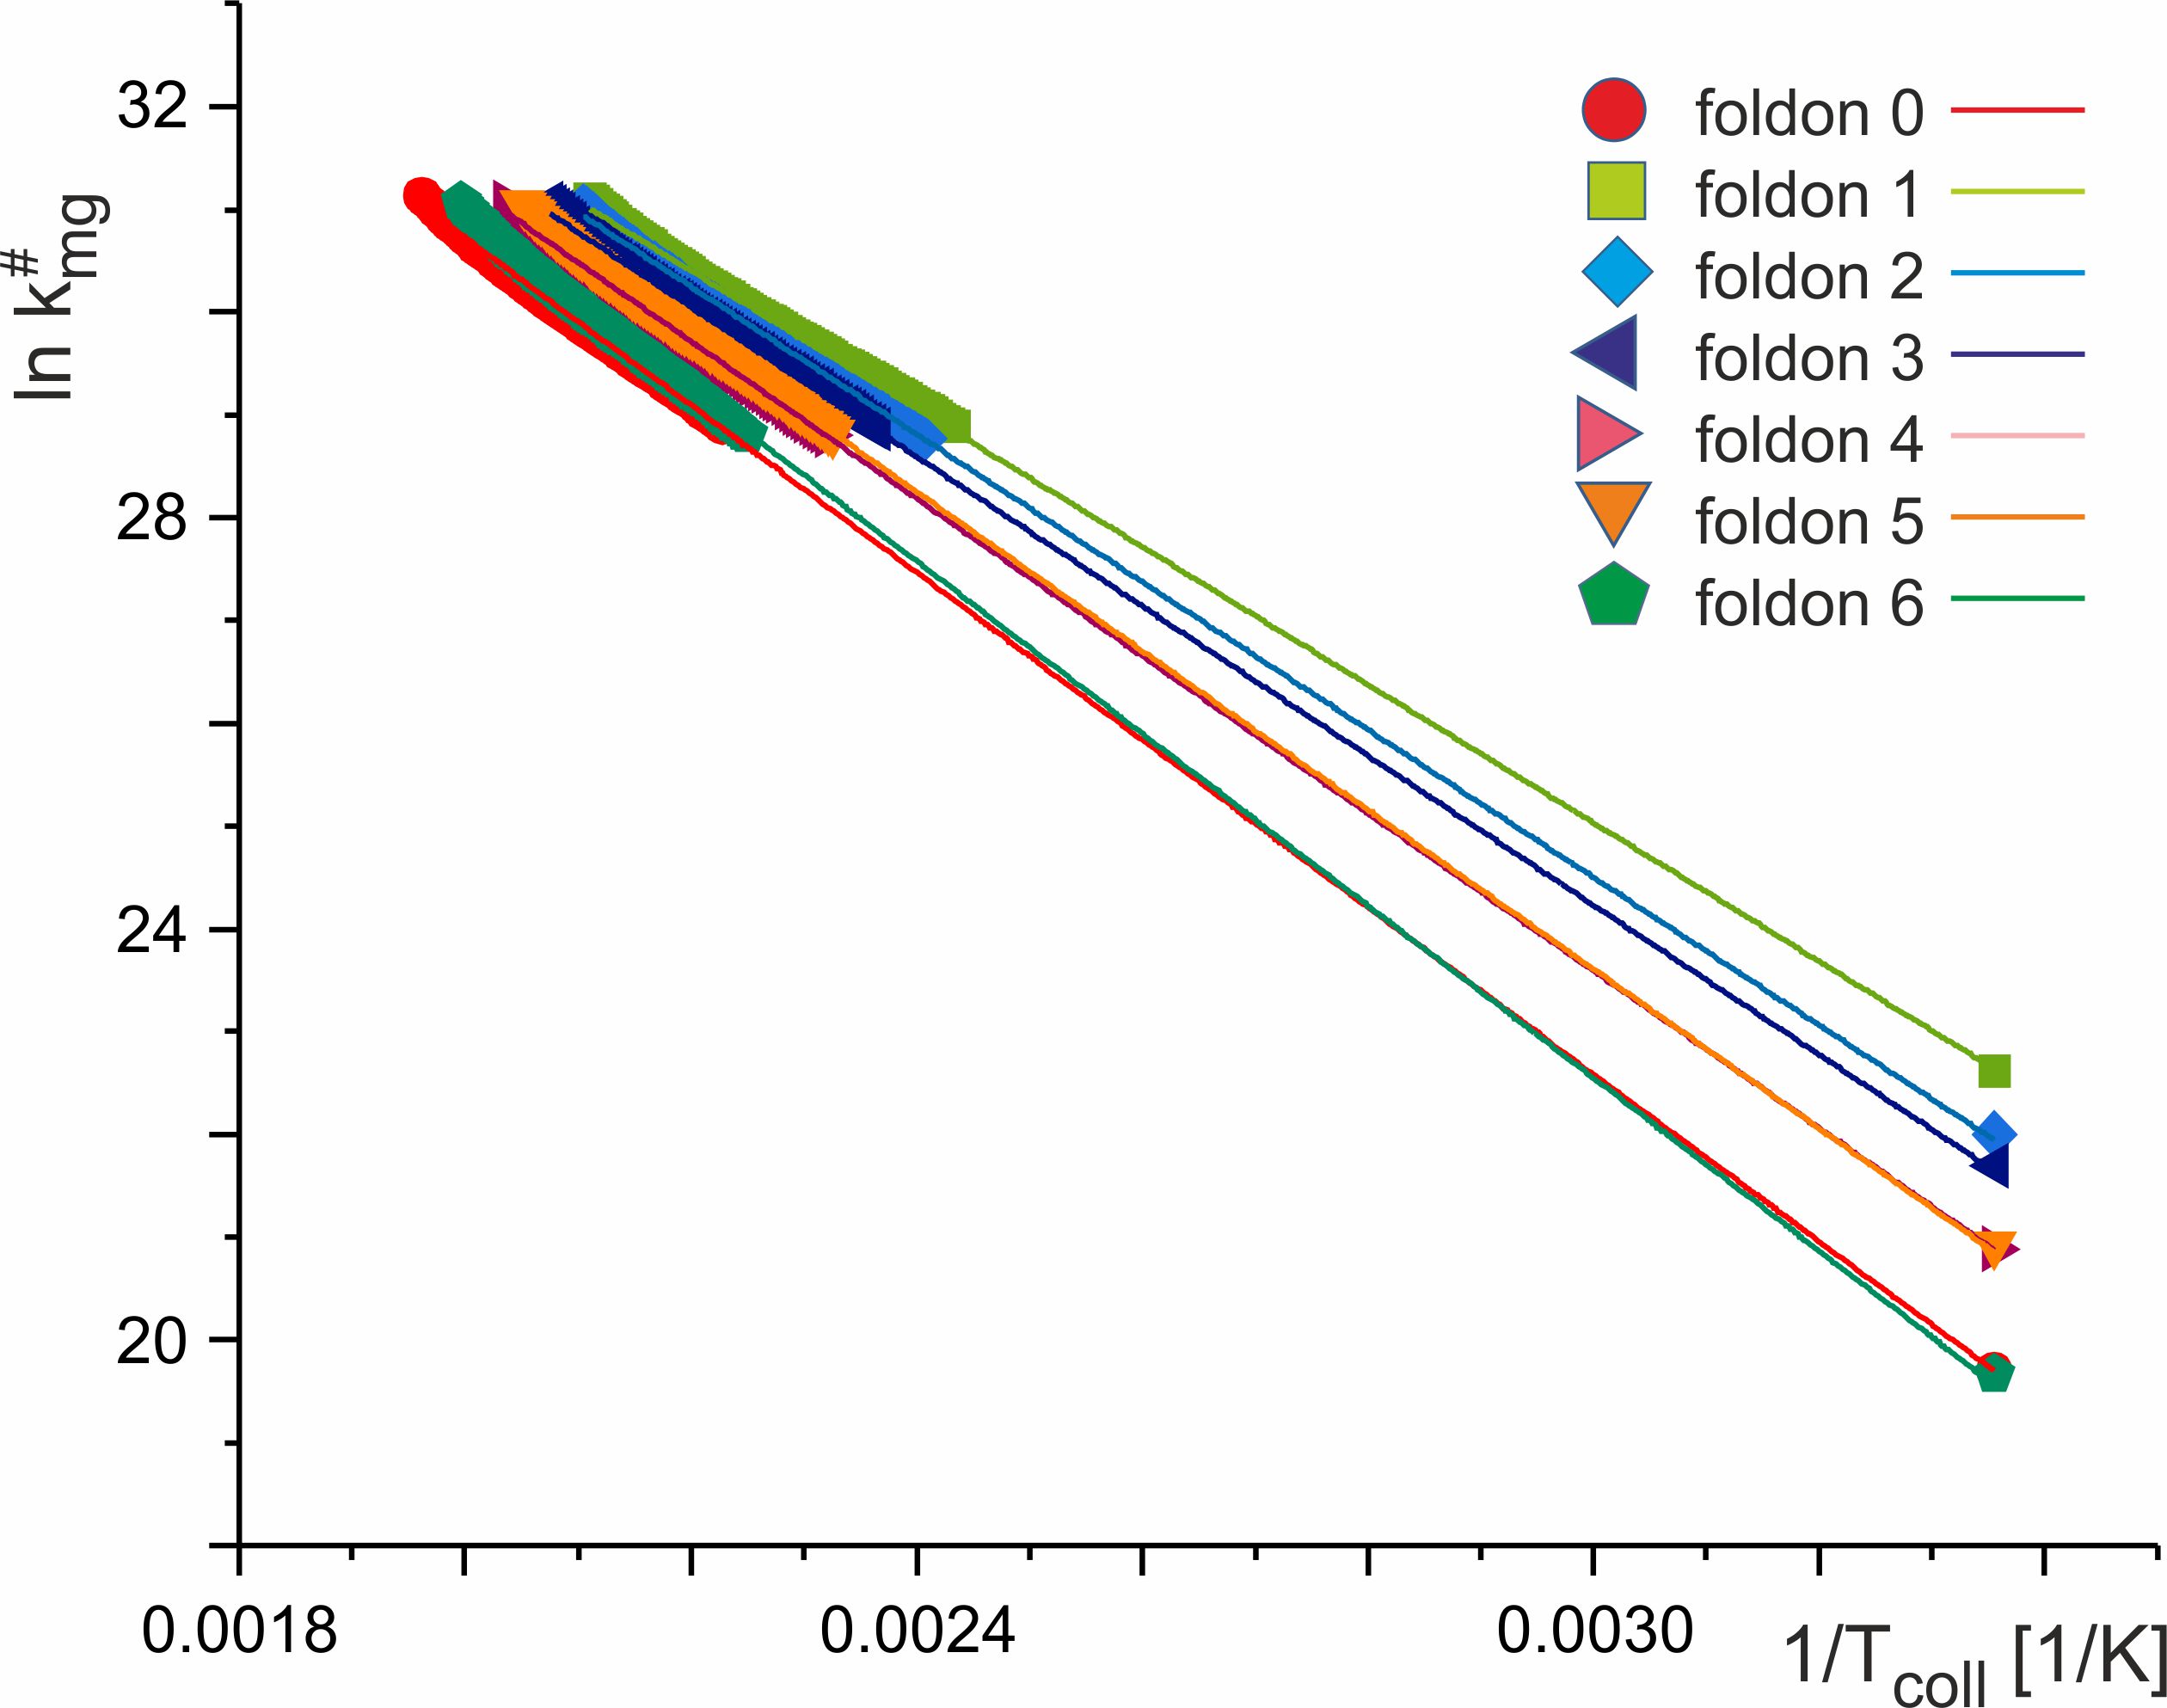


**Figure S11:** Arrhenius plot for the foldon trimer dissociation reactions in the gas phase. Foldon 0 (red circle), foldon 1 (green square), foldon 2 (blue diamond), foldon 3 (dark blue triangle), foldon 4 (pink triangle), foldon 5 (orange triangle), foldon 6 (dark green pentagon). Each data point (thickened parts of the lines) has been obtained experimentally and corresponding lines have been extrapolated linearly. The values for are read at ..


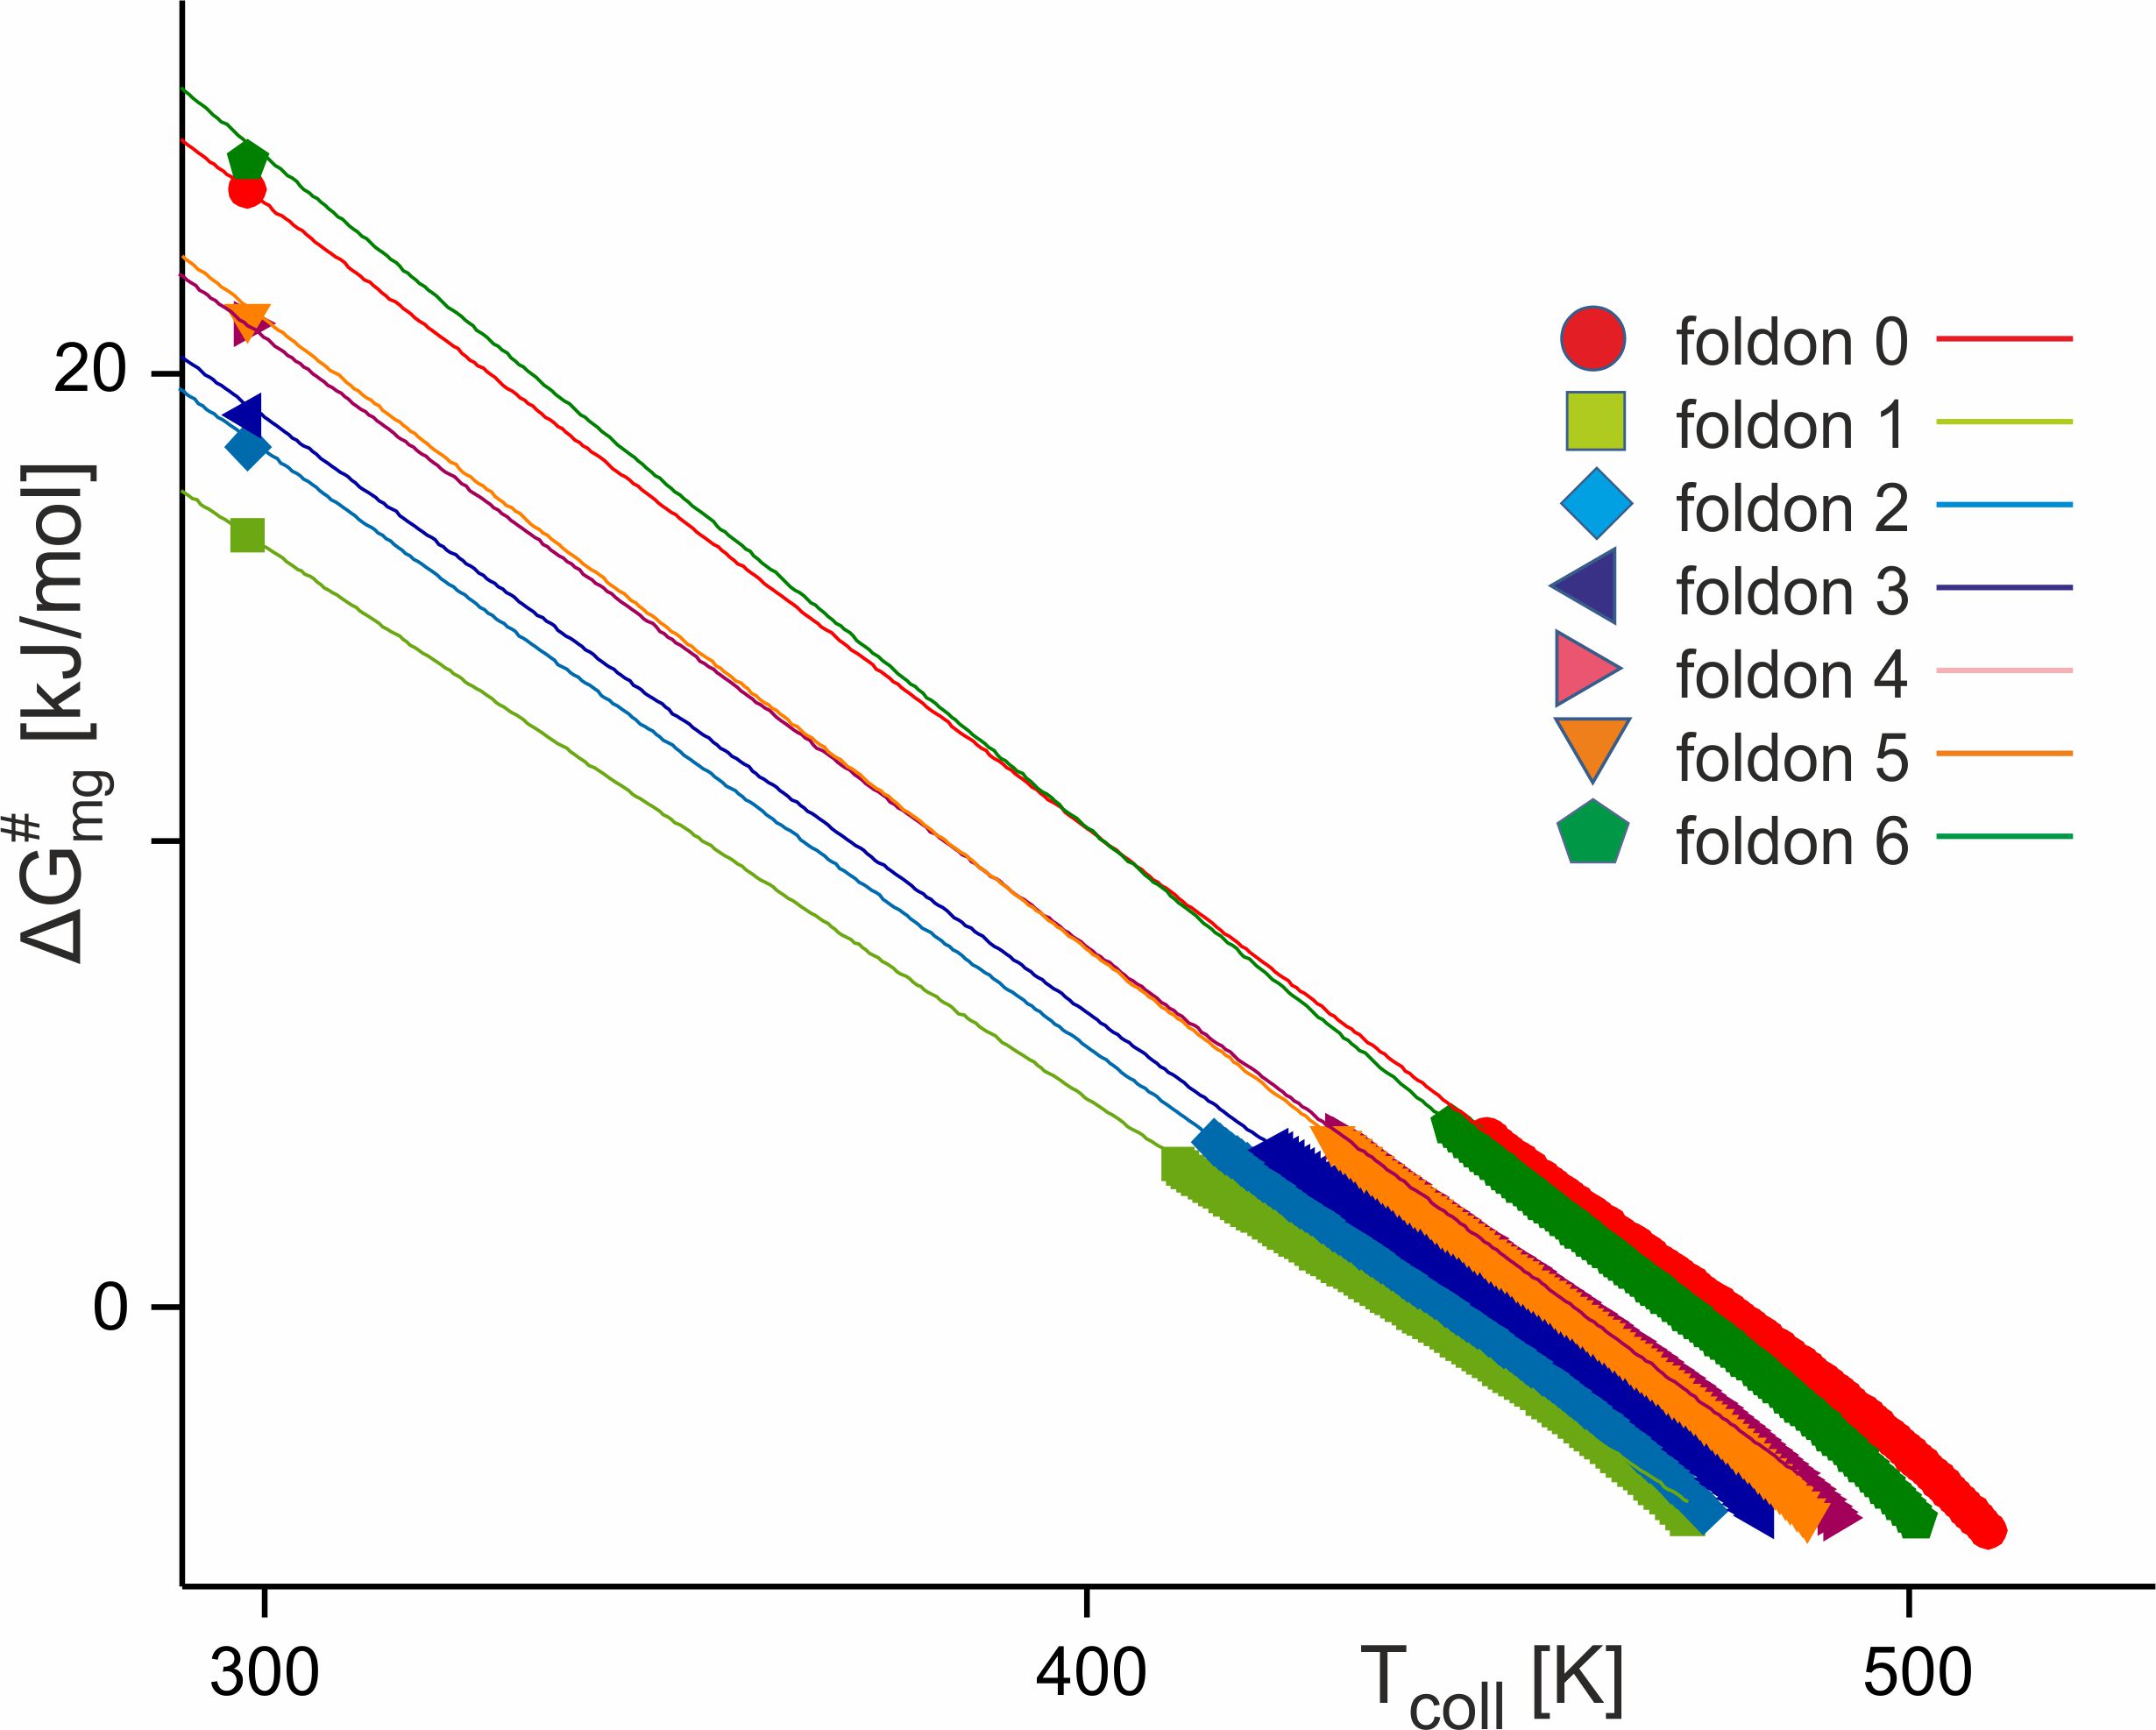


**Figure S12:** Ellingham diagram for the foldon trimer dissociation reactions in the gas phase. Foldon 0 (red circle), foldon 1 (green square), foldon 2 (blue diamond), foldon 3 (dark blue triangle), foldon 4 (pink triangle), foldon 5 (orange triangle), foldon 6 (dark green pentagon). Each data point (thickened parts of the lines) has been obtained experimentally and corresponding lines have been extrapolated linearly. The values for are read at .


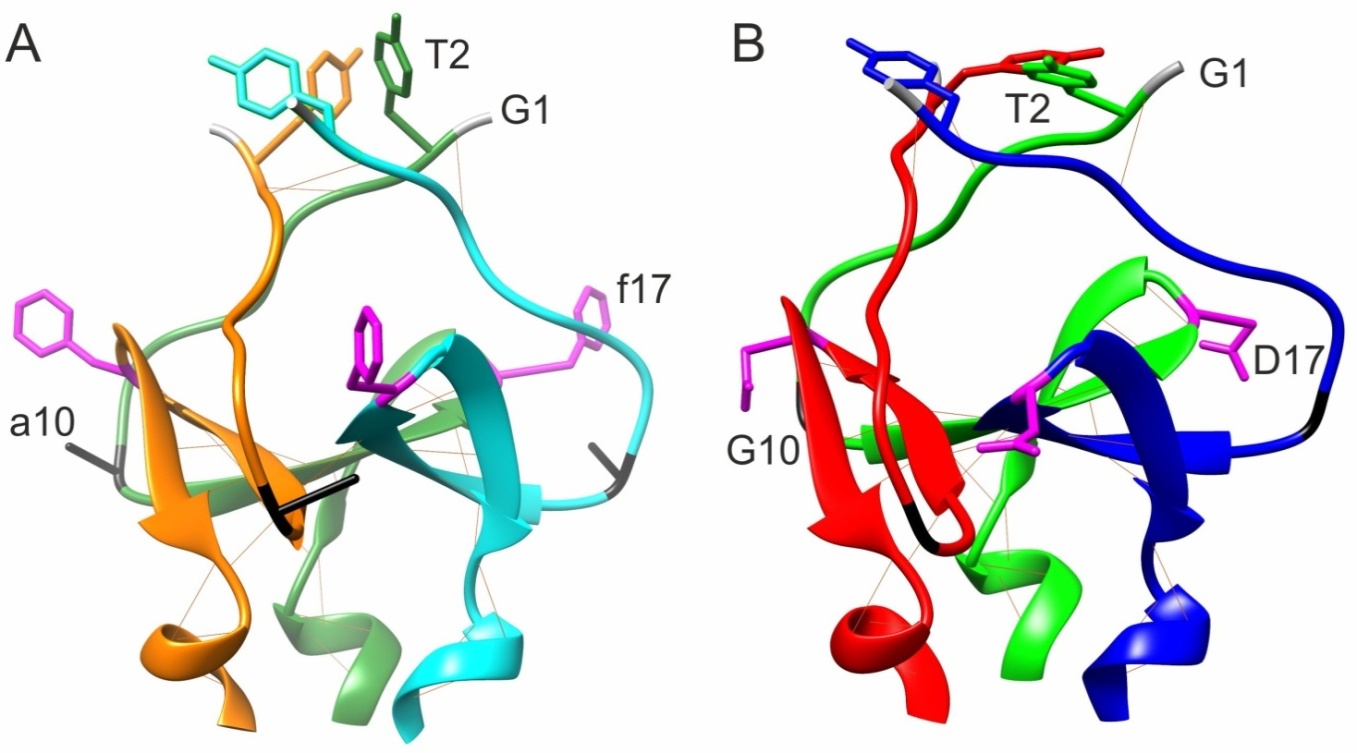


**Figure S13:** Cartoon views of ribbon diagrams of foldon 3D structures. **A**: foldon 1 (2ww6.pdb). B: wild type foldon 0 (1rfo.pdb). Side chains of selected amino acid residues are shown as stick models. Selected amino acid residues of one of the foldon monomers (green chains) are labelled using the single letter code. D-amino acid residues are represented by small letters. Numbers give amino acid residue positions. Thin lines show hydrogen bridges.

# Supplement Tables

**Table S1:** Ion intensities, charge states, and *m/z* values for the foldon 0 homo-trimer at various collision cell voltage difference settings

**1st determination (Foldon_0_02a.raw)**

| ion | *z* | 0V | 2V | 5V | 7V | 10V | 12V | 15V | 20V | 30V | 40V | 50V |
| --- | --- | --- | --- | --- | --- | --- | --- | --- | --- | --- | --- | --- |
| trimer | 5+ | 688000 | 1200000 | 869000 | 938000 | 750000 | 674000 | 399000 | 33500 | 0 | - | 0 |
| dimer | 3+ | 5760 | 11000 | 18300 | 37200 | 81100 | 142000 | 310000 | 498000 | 224000 | - | 0 |
| monomer | 2+ | 7720 | 17100 | 25500 | 50800 | 108000 | 185000 | 394000 | 774000 | 870000 | - | 1250000 |

**2nd determination (Foldon_0_04a.raw)**

| ion | *z* | 0V | 2V | 5V | 7V | 10V | 12V | 15V | 20V | 30V | 40V | 50V |
| --- | --- | --- | --- | --- | --- | --- | --- | --- | --- | --- | --- | --- |
| trimer | 5+ | 674000 | 897000 | 910000 | 1000000 | 853000 | 756000 | 414000 | 26800 | 0 | 0 | 0 |
| dimer | 3+ | 5600 | 11400 | 26000 | 50000 | 106000 | 198000 | 378000 | 564000 | 279000 | 11000 | 0 |
| monomer | 2+ | 9090 | 17100 | 33700 | 64100 | 139000 | 253000 | 487000 | 820000 | 1110000 | 1510000 | 1350000 |

**Table S2:** Ion intensities, charge states, and *m/z* values for the foldon 1 homo-trimer at various collision cell voltage difference settings

**1st determination (Foldon_1_02a.raw)**

| ion | *z* | 0V | 2V | 5V | 7V | 10V | 12V | 15V | 20V | 30V | 40V | 50V |
| --- | --- | --- | --- | --- | --- | --- | --- | --- | --- | --- | --- | --- |
| trimer | 5+ | 526000 | 580000 | 429000 | 494000 | 250000 | 225000 | 86900 | 4310 | 0 | 0 | 0 |
| dimer | 3+ | 12800 | 19800 | 30600 | 56300 | 77100 | 148000 | 199000 | 219000 | 53200 | 0 | 0 |
| monomer | 2+ | 15700 | 24400 | 35100 | 74500 | 104000 | 198000 | 287000 | 386000 | 530000 | 684000 | 532000 |

**2nd determination (Foldon_1_04a.raw)**

| ion | *z* | 0V | 2V | 5V | 7V | 10V | 12V | 15V | 20V | 30V | 40V | 50V |
| --- | --- | --- | --- | --- | --- | --- | --- | --- | --- | --- | --- | --- |
| trimer | 5+ | 196000 | 334000 | 378000 | 367000 | 294000 | 190000 | 76900 | 2360 | 0 | 0 | 0 |
| dimer | 3+ | 5480 | 12000 | 25000 | 43200 | 91600 | 128000 | 200000 | 224000 | 61200 | 1750 | 0 |
| monomer | 2+ | 6810 | 15200 | 34000 | 56800 | 121000 | 183000 | 294000 | 413000 | 630000 | 482000 | 506000 |

**Table S3:** Ion intensities, charge states, and *m/z* values for the foldon 2 homo-trimer at various collision cell voltage difference settings

**1st determination (Foldon_2_03a.raw)**

| ion | *z* | 0V | 2V | 5V | 7V | 10V | 12V | 15V | 20V | 30V | 40V | 50V |
| --- | --- | --- | --- | --- | --- | --- | --- | --- | --- | --- | --- | --- |
| trimer | 5+ | 98500 | 114000 | 128000 | 138000 | 122000 | 102000 | 49400 | 1940 | 0 | 0 | 0 |
| dimer | 3+ | 571 | 1070 | 3630 | 7300 | 22800 | 42000 | 78100 | 111000 | 51100 | 3350 | 0 |
| monomer | 2+ | 886 | 2030 | 5450 | 11800 | 42600 | 80300 | 162000 | 256000 | 475000 | 670000 | 789000 |

**2nd determination (Foldon_2_05a.raw)**

| ion | *z* | 0V | 2V | 5V | 7V | 10V | 12V | 15V | 20V | 30V | 40V | 50V |
| --- | --- | --- | --- | --- | --- | --- | --- | --- | --- | --- | --- | --- |
| trimer | 5+ | 153000 | 186000 | 196000 | 226000 | 216000 | 181000 | 77100 | 2710 | 0 | 0 | 0 |
| dimer | 3+ | 1540 | 2430 | 7080 | 18900 | 53600 | 104000 | 172000 | 251000 | 88600 | 0 | 0 |
| monomer | 2+ | 1600 | 4040 | 13500 | 35100 | 93300 | 171000 | 304000 | 475000 | 864000 | 1230000 | 1420000 |

**Table S4:** Ion intensities, charge states, and *m/z* values for the foldon 3 homo-trimer at various collision cell voltage difference settings

**1st determination (Foldon_3_02a.raw)**

| ion | *z* | 0V | 2V | 5V | 7V | 10V | 12V | 15V | 20V | 30V | 40V | 50V |
| --- | --- | --- | --- | --- | --- | --- | --- | --- | --- | --- | --- | --- |
| trimer | 5+ | 1450000 | 713000 | 720000 | 590000 | 562000 | 366000 | 129000 | 5020 | 0 | 0 | 0 |
| dimer | 3+ | 14100 | 11100 | 27100 | 43300 | 117000 | 178000 | 257000 | 398000 | 61600 | 8530 | 0 |
| monomer | 2+ | 18600 | 16500 | 37800 | 56900 | 160000 | 235000 | 365000 | 711000 | 720000 | 1080000 | 1140000 |

**2nd determination (Foldon_3_05a.raw)**

| ion | *z* | 0V | 2V | 5V | 7V | 10V | 12V | 15V | 20V | 30V | 40V | 50V |
| --- | --- | --- | --- | --- | --- | --- | --- | --- | --- | --- | --- | --- |
| trimer | 5+ | 728000 | 823000 | 773000 | 759000 | 607000 | 441000 | 172000 | 9690 | 0 | 0 | 0 |
| dimer | 3+ | 9790 | 15900 | 36900 | 68400 | 154000 | 243000 | 351000 | 401000 | 91600 | 5180 | 0 |
| monomer | 2+ | 15100 | 25300 | 49300 | 85600 | 198000 | 314000 | 515000 | 703000 | 1070000 | 1160000 | 997000 |

**Table S5:** Ion intensities, charge states, and *m/z* values for the foldon 4 homo-trimer at various collision cell voltage difference settings

**1st determination (Foldon_4_02a.raw)**

| ion | *z* | 0V | 2V | 5V | 7V | 10V | 12V | 15V | 20V | 30V | 40V | 50V |
| --- | --- | --- | --- | --- | --- | --- | --- | --- | --- | --- | --- | --- |
| trimer | 5+ | 52400 | 68500 | 79400 | 66300 | 56700 | 49800 | 25800 | 3170 | 0 | 0 | 0 |
| dimer | 3+ | 258 | 868 | 1510 | 2720 | 6800 | 13100 | 25700 | 33000 | 13400 | 1320 | 0 |
| monomer | 2+ | 483 | 851 | 2640 | 4360 | 13400 | 24600 | 49000 | 84600 | 137000 | 158000 | 140000 |

**2nd determination (Foldon_4_04a.raw)**

| ion | *z* | 0V | 2V | 5V | 7V | 10V | 12V | 15V | 20V | 30V | 40V | 50V |
| --- | --- | --- | --- | --- | --- | --- | --- | --- | --- | --- | --- | --- |
| trimer | 5+ | 108000 | 144000 | 146000 | 143000 | 128000 | 100000 | 48800 | 2520 | 0 | 0 | 0 |
| dimer | 3+ | 593 | 1560 | 3440 | 6610 | 21700 | 36500 | 66900 | 89400 | 34300 | 2460 | 0 |
| monomer | 2+ | 1020 | 2300 | 6150 | 12900 | 40000 | 63500 | 130000 | 210000 | 309000 | 336000 | 316000 |

**Table S6:** Ion intensities, charge states, and *m/z* values for the foldon 5 homo-trimer at various collision cell voltage difference settings

**1st determination (Foldon_5_02a.raw)**

| ion | *z* | 0V | 2V | 5V | 7V | 10V | 12V | 15V | 20V | 30V | 40V | 50V |
| --- | --- | --- | --- | --- | --- | --- | --- | --- | --- | --- | --- | --- |
| trimer | 5+ | 31100 | 69400 | 104000 | 115000 | 128000 | 119000 | 84800 | 7660 | 0 | 0 | 0 |
| dimer | 3+ | 94 | 506 | 764 | 2280 | 9710 | 18400 | 46800 | 81400 | 36800 | 0 | 0 |
| monomer | 2+ | 126 | 279 | 1330 | 4040 | 15500 | 38700 | 106000 | 213000 | 353000 | 397000 | 354000 |

**2nd determination (Foldon_5_04a.raw)**

| ion | *z* | 0V | 2V | 5V | 7V | 10V | 12V | 15V | 20V | 30V | 40V | 50V |
| --- | --- | --- | --- | --- | --- | --- | --- | --- | --- | --- | --- | --- |
| trimer | 5+ | 172000 | 215000 | 235000 | 217000 | 174000 | 140000 | 81700 | 5220 | 0 | 0 | 0 |
| dimer | 3+ | 535 | 0 | 2490 | 5760 | 14600 | 29100 | 53600 | 77600 | 26000 | 0 | 0 |
| monomer | 2+ | 1250 | 1680 | 5090 | 10700 | 30500 | 56500 | 123000 | 202000 | 301000 | 313000 | 275000 |

**Table S7:** Ion intensities, charge states, and *m/z* values for the foldon 6 homo-trimer at various collision cell voltage difference settings

**1st determination (Foldon_6_02a.raw)**

| ion | *z* | 0V | 2V | 5V | 7V | 10V | 12V | 15V | 20V | 30V | 40V | 50V |
| --- | --- | --- | --- | --- | --- | --- | --- | --- | --- | --- | --- | --- |
| trimer | 5+ | 1400000 | 1190000 | 820000 | 668000 | 619000 | 474000 | 195000 | 8180 | 0 | 0 | 0 |
| dimer | 3+ | 11900 | 13100 | 23500 | 35700 | 93500 | 167000 | 266000 | 309000 | 75600 | 0 | 0 |
| monomer | 2+ | 16600 | 18600 | 33100 | 52800 | 141000 | 248000 | 426000 | 610000 | 830000 | 919000 | 851000 |

**2nd determination (Foldon_6_04a.raw)**

| ion | *z* | 0V | 2V | 5V | 7V | 10V | 12V | 15V | 20V | 30V | 40V | 50V |
| --- | --- | --- | --- | --- | --- | --- | --- | --- | --- | --- | --- | --- |
| trimer | 5+ | 340000 | 433000 | 444000 | 406000 | 340000 | 237000 | 103000 | 3540 | 0 | 0 | 0 |
| dimer | 3+ | 1940 | 4030 | 9770 | 21500 | 51600 | 80600 | 129000 | 150000 | 49600 | 0 | 0 |
| monomer | 2+ | 3530 | 8170 | 18000 | 33400 | 90300 | 138000 | 241000 | 347000 | 517000 | 533000 | 467000 |

**Table S8:** Boltzmann curve parameters of foldon trimer dissociation reactions in the gas phase.

| foldon / symbol | *m/z* (trimer 5+) | A1 | A2 | ΔCV50 | dx | R2 | m | n | y(0) |
| --- | --- | --- | --- | --- | --- | --- | --- | --- | --- |
| 0 / | 1848.94 | 97.16 | 0.00 | 13.51 | 2.28 | 0.999 | -10.64 | 192.36 | 48.58 |
| 1 / | 1875.99 | 94.50 | 0.00 | 11.04 | 2.39 | 0.999 | -9.89 | 156.46 | 47.25 |
| 2 / | 1875.95 | 98,42 | 0,00 | 11,27 | 2,30 | 0,999 | -10,69 | 169,65 | 49,21 |
| 3 / | 1841.69 | 96.70 | 0.00 | 11.63 | 2.27 | 0.999 | -10.66 | 172.29 | 48.35 |
| 4 / | 1841.78 | 98.56 | 0.00 | 12.26 | 2.30 | 0.999 | -10.70 | 180.47 | 49.28 |
| 5 / | 1862.01 | 97.82 | 0.00 | 12.25 | 2.22 | 0.999 | -10.99 | 183.66 | 48.91 |
| 6 / | 1877.92 | 99.30 | 0.00 | 13.42 | 2.20 | 0.999 | -11.29 | 201.08 | 49.65 |

**Table S9:** Van der Waals contacts (no heteroatoms) in the foldon 0 trimer.

| chain1 | residue1 | res_id1 | atom1 | chain2 | residue2 | res_id2 | atom2 | distance | intracatenane | intercatenane | total |
| --- | --- | --- | --- | --- | --- | --- | --- | --- | --- | --- | --- |
| A | GLY | 1 | C | A | TYR | 2 | C | 3.39 | yes |  |  |
| A | GLY | 1 | C | A | TYR | 2 | CB | 3.6 | yes |  |  |
| A | GLY | 1 | C | A | TYR | 2 | CG | 3.93 | yes |  |  |
| A | GLY | 1 | C | A | TYR | 2 | CD1 | 3.37 | yes |  |  |
| A | GLY | 1 | C | C | GLU | 5 | CB | 3.86 |  | yes |  |
| A | TYR | 2 | C | A | ILE | 3 | C | 3.28 | yes |  |  |
| A | TYR | 2 | C | A | ILE | 3 | CB | 3.71 | yes |  |  |
| A | TYR | 2 | C | B | TYR | 2 | CD2 | 3.83 |  | yes |  |
| A | TYR | 2 | C | B | TYR | 2 | CE2 | 3.13 |  | yes |  |
| A | TYR | 2 | C | B | TYR | 2 | CZ | 3.93 |  | yes |  |
| A | TYR | 2 | C | C | GLU | 5 | CB | 3.43 |  | yes |  |
| A | TYR | 2 | CB | B | TYR | 2 | CD2 | 3.47 |  | yes |  |
| A | TYR | 2 | CB | B | TYR | 2 | CE2 | 3.37 |  | yes |  |
| A | TYR | 2 | CD1 | C | ILE | 3 | C | 3.77 |  | yes |  |
| A | TYR | 2 | CD1 | C | PRO | 4 | CB | 3.69 |  | yes |  |
| A | TYR | 2 | CD2 | C | TYR | 2 | C | 3.56 |  | yes |  |
| A | TYR | 2 | CD2 | C | TYR | 2 | CB | 3.21 |  | yes |  |
| A | TYR | 2 | CD2 | C | ILE | 3 | C | 3.81 |  | yes |  |
| A | TYR | 2 | CE1 | C | PRO | 4 | CB | 3.79 |  | yes |  |
| A | TYR | 2 | CE2 | C | TYR | 2 | C | 3.33 |  | yes |  |
| A | TYR | 2 | CE2 | C | TYR | 2 | CB | 3.51 |  | yes |  |
| A | ILE | 3 | C | A | PRO | 4 | C | 3.26 | yes |  |  |
| A | ILE | 3 | C | A | PRO | 4 | CB | 3.6 | yes |  |  |
| A | ILE | 3 | C | A | PRO | 4 | CG | 3.59 | yes |  |  |
| A | ILE | 3 | C | A | PRO | 4 | CD | 2.5 | yes |  |  |
| A | ILE | 3 | C | B | TYR | 2 | CG | 3.88 |  | yes |  |
| A | ILE | 3 | C | B | TYR | 2 | CD2 | 3.54 |  | yes |  |
| A | ILE | 3 | C | B | TYR | 2 | CE2 | 3.52 |  | yes |  |
| A | ILE | 3 | C | B | TYR | 2 | CZ | 3.83 |  | yes |  |
| A | ILE | 3 | CB | A | PRO | 4 | CD | 3.39 | yes |  |  |
| A | ILE | 3 | CB | A | ARG | 15 | CZ | 3.58 | yes |  |  |
| A | ILE | 3 | CG1 | A | TRP | 20 | CZ2 | 3.98 | yes |  |  |
| A | ILE | 3 | CG2 | A | ARG | 15 | CG | 3.66 | yes |  |  |
| A | ILE | 3 | CG2 | A | ARG | 15 | CD | 3.83 | yes |  |  |
| A | ILE | 3 | CG2 | A | ARG | 15 | CZ | 3.15 | yes |  |  |
| A | ILE | 3 | CG2 | C | GLU | 5 | C | 3.95 |  | yes |  |
| A | ILE | 3 | CG2 | C | GLU | 5 | CB | 3.36 |  | yes |  |
| A | ILE | 3 | CG2 | C | GLU | 5 | CG | 3.4 |  | yes |  |
| A | ILE | 3 | CG2 | C | GLU | 5 | CD | 3.09 |  | yes |  |
| A | ILE | 3 | CD1 | A | ARG | 15 | CG | 3.29 | yes |  |  |
| A | ILE | 3 | CD1 | A | TRP | 20 | CZ2 | 3.15 | yes |  |  |
| A | ILE | 3 | CD1 | A | TRP | 20 | CH2 | 3.25 | yes |  |  |
| A | ILE | 3 | CD1 | B | ILE | 3 | CD1 | 3.85 |  | yes |  |
| A | ILE | 3 | CD1 | C | ILE | 3 | CD1 | 3.71 |  | yes |  |
| A | ILE | 3 | CD1 | C | TRP | 20 | CZ2 | 2.99 |  | yes |  |
| A | ILE | 3 | CD1 | C | TRP | 20 | CH2 | 3.33 |  | yes |  |
| A | PRO | 4 | C | A | GLU | 5 | C | 3.1 | yes |  |  |
| A | PRO | 4 | C | A | GLU | 5 | CB | 3.72 | yes |  |  |
| A | PRO | 4 | CB | B | TYR | 2 | CD1 | 3.68 |  | yes |  |
| A | PRO | 4 | CB | B | TYR | 2 | CE1 | 3.54 |  | yes |  |
| A | PRO | 4 | CD | A | ARG | 15 | CZ | 3.61 | yes |  |  |
| A | GLU | 5 | C | A | ALA | 6 | C | 3.27 | yes |  |  |
| A | GLU | 5 | C | A | ALA | 6 | CB | 3.68 | yes |  |  |
| A | GLU | 5 | C | A | TRP | 20 | CD1 | 3.55 | yes |  |  |
| A | GLU | 5 | CB | B | GLY | 1 | C | 3.69 |  | yes |  |
| A | GLU | 5 | CB | B | TYR | 2 | C | 3.72 |  | yes |  |
| A | GLU | 5 | CB | B | ILE | 3 | CG2 | 3.53 |  | yes |  |
| A | GLU | 5 | CG | B | ILE | 3 | CG2 | 3.64 |  | yes |  |
| A | GLU | 5 | CD | B | ILE | 3 | CG2 | 2.98 |  | yes |  |
| A | ALA | 6 | C | A | PRO | 7 | C | 3.05 | yes |  |  |
| A | ALA | 6 | C | A | PRO | 7 | CB | 3.66 | yes |  |  |
| A | ALA | 6 | C | A | PRO | 7 | CG | 3.64 | yes |  |  |
| A | ALA | 6 | C | A | PRO | 7 | CD | 2.5 | yes |  |  |
| A | ALA | 6 | CB | A | PRO | 7 | CD | 3.26 | yes |  |  |
| A | ALA | 6 | CB | A | TYR | 13 | CG | 3.96 | yes |  |  |
| A | ALA | 6 | CB | A | TYR | 13 | CD2 | 3.49 | yes |  |  |
| A | ALA | 6 | CB | A | TRP | 20 | CB | 3.51 | yes |  |  |
| A | ALA | 6 | CB | A | TRP | 20 | CG | 3 | yes |  |  |
| A | ALA | 6 | CB | A | TRP | 20 | CD1 | 2.99 | yes |  |  |
| A | ALA | 6 | CB | A | TRP | 20 | CD2 | 3.46 | yes |  |  |
| A | ALA | 6 | CB | A | TRP | 20 | CE2 | 3.71 | yes |  |  |
| A | ALA | 6 | CB | B | ARG | 15 | CZ | 3.54 |  | yes |  |
| A | PRO | 7 | C | A | ARG | 8 | C | 3.45 | yes |  |  |
| A | PRO | 7 | C | A | ARG | 8 | CB | 3.54 | yes |  |  |
| A | PRO | 7 | C | A | ARG | 8 | CZ | 3.98 | yes |  |  |
| A | PRO | 7 | CB | A | TYR | 13 | CE2 | 3.67 | yes |  |  |
| A | PRO | 7 | CG | A | TYR | 13 | CE2 | 3.45 | yes |  |  |
| A | PRO | 7 | CG | A | TYR | 13 | CZ | 3.51 | yes |  |  |
| A | PRO | 7 | CD | A | TYR | 13 | CD2 | 3.67 | yes |  |  |
| A | PRO | 7 | CD | A | TYR | 13 | CE2 | 3.24 | yes |  |  |
| A | PRO | 7 | CD | A | TYR | 13 | CZ | 3.67 | yes |  |  |
| A | ARG | 8 | C | A | ASP | 9 | C | 3.36 | yes |  |  |
| A | ARG | 8 | C | A | ASP | 9 | CB | 3.57 | yes |  |  |
| A | ARG | 8 | CG | B | ASP | 17 | C | 3.56 |  | yes |  |
| A | ASP | 9 | C | A | GLY | 10 | C | 3.18 | yes |  |  |
| A | ASP | 9 | CG | A | GLN | 11 | CB | 3.92 | yes |  |  |
| A | GLY | 10 | C | A | GLN | 11 | C | 3.38 | yes |  |  |
| A | GLY | 10 | C | A | GLN | 11 | CB | 3.56 | yes |  |  |
| A | GLY | 10 | C | B | LYS | 16 | CG | 3.72 |  | yes |  |
| A | GLY | 10 | C | B | LYS | 16 | CD | 3.27 |  | yes |  |
| A | GLY | 10 | C | B | LYS | 16 | CE | 3.57 |  | yes |  |
| A | GLN | 11 | C | A | ALA | 12 | C | 3.33 | yes |  |  |
| A | GLN | 11 | C | A | ALA | 12 | CB | 3.57 | yes |  |  |
| A | GLN | 11 | C | B | LYS | 16 | CB | 3.41 |  | yes |  |
| A | GLN | 11 | C | B | LYS | 16 | CG | 3.42 |  | yes |  |
| A | GLN | 11 | C | B | LYS | 16 | CD | 3.08 |  | yes |  |
| A | GLN | 11 | CB | A | LEU | 22 | CD2 | 3.3 | yes |  |  |
| A | GLN | 11 | CG | A | LEU | 22 | CD2 | 3.37 | yes |  |  |
| A | GLN | 11 | CD | A | LEU | 22 | CD1 | 3.69 | yes |  |  |
| A | GLN | 11 | CD | A | LEU | 22 | CD2 | 3.62 | yes |  |  |
| A | ALA | 12 | C | A | TYR | 13 | C | 3.49 | yes |  |  |
| A | ALA | 12 | C | A | TYR | 13 | CB | 3.44 | yes |  |  |
| A | ALA | 12 | C | A | TYR | 13 | CG | 3.58 | yes |  |  |
| A | ALA | 12 | C | A | TYR | 13 | CD2 | 3.88 | yes |  |  |
| A | ALA | 12 | C | B | VAL | 14 | CG2 | 3.43 |  | yes |  |
| A | ALA | 12 | CB | A | LEU | 23 | CB | 3.85 | yes |  |  |
| A | ALA | 12 | CB | B | VAL | 14 | CG1 | 3.93 |  | yes |  |
| A | ALA | 12 | CB | B | VAL | 14 | CG2 | 3.01 |  | yes |  |
| A | ALA | 12 | CB | B | LYS | 16 | CB | 3.7 |  | yes |  |
| A | ALA | 12 | CB | B | LYS | 16 | CD | 3.94 |  | yes |  |
| A | ALA | 12 | CB | B | PHE | 26 | CE1 | 3.44 |  | yes |  |
| A | ALA | 12 | CB | B | PHE | 26 | CE2 | 3.4 |  | yes |  |
| A | ALA | 12 | CB | B | PHE | 26 | CZ | 2.97 |  | yes |  |
| A | TYR | 13 | C | A | VAL | 14 | C | 3.32 | yes |  |  |
| A | TYR | 13 | C | A | VAL | 14 | CB | 3.5 | yes |  |  |
| A | TYR | 13 | C | A | VAL | 14 | CG2 | 3.35 | yes |  |  |
| A | TYR | 13 | C | A | TRP | 20 | CE3 | 3.8 | yes |  |  |
| A | TYR | 13 | C | B | VAL | 14 | CG2 | 3.39 |  | yes |  |
| A | TYR | 13 | CB | A | TRP | 20 | C | 3.97 | yes |  |  |
| A | TYR | 13 | CB | A | TRP | 20 | CB | 3.38 | yes |  |  |
| A | TYR | 13 | CB | A | TRP | 20 | CG | 3.93 | yes |  |  |
| A | TYR | 13 | CB | A | TRP | 20 | CD2 | 3.9 | yes |  |  |
| A | TYR | 13 | CB | A | TRP | 20 | CE3 | 3.45 | yes |  |  |
| A | TYR | 13 | CG | A | TRP | 20 | C | 3.84 | yes |  |  |
| A | TYR | 13 | CG | A | TRP | 20 | CB | 3.34 | yes |  |  |
| A | TYR | 13 | CD1 | A | TRP | 20 | C | 3.12 | yes |  |  |
| A | TYR | 13 | CD1 | A | TRP | 20 | CB | 3.47 | yes |  |  |
| A | TYR | 13 | CD1 | A | VAL | 21 | C | 3.26 | yes |  |  |
| A | TYR | 13 | CD2 | A | TRP | 20 | CB | 4 | yes |  |  |
| A | TYR | 13 | CE1 | A | TRP | 20 | C | 3.82 | yes |  |  |
| A | TYR | 13 | CE1 | A | VAL | 21 | C | 3.97 | yes |  |  |
| A | TYR | 13 | CE1 | A | LEU | 22 | CG | 3.95 | yes |  |  |
| A | TYR | 13 | CE1 | A | LEU | 22 | CD2 | 3.91 | yes |  |  |
| A | VAL | 14 | C | A | ARG | 15 | C | 3.33 | yes |  |  |
| A | VAL | 14 | C | A | ARG | 15 | CB | 3.52 | yes |  |  |
| A | VAL | 14 | C | A | TRP | 20 | CE3 | 3.43 | yes |  |  |
| A | VAL | 14 | C | A | TRP | 20 | CZ3 | 3.51 | yes |  |  |
| A | VAL | 14 | CB | A | VAL | 21 | CG2 | 3.25 | yes |  |  |
| A | VAL | 14 | CB | C | ALA | 12 | CB | 3.84 |  | yes |  |
| A | VAL | 14 | CB | C | LEU | 23 | CD2 | 3.88 |  | yes |  |
| A | VAL | 14 | CG1 | C | ALA | 12 | C | 3.97 |  | yes |  |
| A | VAL | 14 | CG1 | C | ALA | 12 | CB | 3.42 |  | yes |  |
| A | VAL | 14 | CG1 | C | TYR | 13 | C | 3.77 |  | yes |  |
| A | VAL | 14 | CG1 | C | LEU | 23 | CB | 3.46 |  | yes |  |
| A | VAL | 14 | CG1 | C | LEU | 23 | CG | 3.86 |  | yes |  |
| A | VAL | 14 | CG1 | C | LEU | 23 | CD2 | 3.17 |  | yes |  |
| A | VAL | 14 | CG2 | A | VAL | 21 | C | 3.85 | yes |  |  |
| A | VAL | 14 | CG2 | A | VAL | 21 | CG2 | 3.3 | yes |  |  |
| A | VAL | 14 | CG2 | A | LEU | 22 | C | 3.93 | yes |  |  |
| A | VAL | 14 | CG2 | A | LEU | 23 | CB | 3.81 | yes |  |  |
| A | VAL | 14 | CG2 | C | LEU | 23 | CD2 | 3.54 |  | yes |  |
| A | ARG | 15 | C | A | LYS | 16 | C | 3.61 | yes |  |  |
| A | ARG | 15 | C | A | LYS | 16 | CB | 3.35 | yes |  |  |
| A | ARG | 15 | CB | A | TRP | 20 | CZ3 | 3.37 | yes |  |  |
| A | ARG | 15 | CB | A | TRP | 20 | CH2 | 3.66 | yes |  |  |
| A | ARG | 15 | CB | C | TYR | 13 | O | 3.84 |  | yes |  |
| A | ARG | 15 | CB | C | TRP | 20 | CZ3 | 3.69 |  | yes |  |
| A | ARG | 15 | CB | C | TRP | 20 | CH2 | 3.91 |  | yes |  |
| A | ARG | 15 | CG | A | TRP | 20 | CE3 | 3.91 | yes |  |  |
| A | ARG | 15 | CG | A | TRP | 20 | CZ2 | 3.64 | yes |  |  |
| A | ARG | 15 | CG | A | TRP | 20 | CZ3 | 3.31 | yes |  |  |
| A | ARG | 15 | CG | A | TRP | 20 | CH2 | 3.15 | yes |  |  |
| A | ARG | 15 | CD | A | GLU | 19 | C | 3.73 | yes |  |  |
| A | ARG | 15 | CD | A | TRP | 20 | CD2 | 3.94 | yes |  |  |
| A | ARG | 15 | CD | A | TRP | 20 | CE2 | 3.98 | yes |  |  |
| A | ARG | 15 | CD | A | TRP | 20 | CE3 | 3.84 | yes |  |  |
| A | ARG | 15 | CD | A | TRP | 20 | CZ2 | 3.95 | yes |  |  |
| A | ARG | 15 | CD | A | TRP | 20 | CZ3 | 3.78 | yes |  |  |
| A | ARG | 15 | CD | A | TRP | 20 | CH2 | 3.84 | yes |  |  |
| A | ARG | 15 | CZ | A | GLY | 18 | C | 2.91 | yes |  |  |
| A | ARG | 15 | CZ | C | GLU | 5 | OE2 | 2.98 |  | yes |  |
| A | LYS | 16 | C | A | ASP | 17 | C | 2.94 | yes |  |  |
| A | LYS | 16 | C | A | ASP | 17 | CB | 3.18 | yes |  |  |
| A | LYS | 16 | C | A | ASP | 17 | CG | 2.98 | yes |  |  |
| A | LYS | 16 | C | A | ASP | 17 | OD1 | 2.91 | yes |  |  |
| A | LYS | 16 | C | A | ASP | 17 | OD2 | 3.66 | yes |  |  |
| A | LYS | 16 | CB | A | ASP | 17 | CG | 3.99 | yes |  |  |
| A | LYS | 16 | CB | A | ASP | 17 | OD2 | 3.93 | yes |  |  |
| A | LYS | 16 | CB | C | GLN | 11 | C | 3.24 |  | yes |  |
| A | LYS | 16 | CB | C | ALA | 12 | CB | 3.65 |  | yes |  |
| A | LYS | 16 | CG | A | ASP | 17 | CB | 3.94 | yes |  |  |
| A | LYS | 16 | CG | A | ASP | 17 | CG | 2.83 | yes |  |  |
| A | LYS | 16 | CG | A | VAL | 21 | CG1 | 3.92 | yes |  |  |
| A | LYS | 16 | CG | C | GLY | 10 | C | 3.83 |  | yes |  |
| A | LYS | 16 | CG | C | GLN | 11 | C | 3.96 |  | yes |  |
| A | LYS | 16 | CD | A | ASP | 17 | CG | 3.72 | yes |  |  |
| A | LYS | 16 | CD | A | ASP | 17 | OD1 | 3.7 | yes |  |  |
| A | LYS | 16 | CD | A | ASP | 17 | OD2 | 3.14 | yes |  |  |
| A | LYS | 16 | CD | A | VAL | 21 | CG1 | 3.41 | yes |  |  |
| A | LYS | 16 | CE | A | ASP | 17 | OD2 | 3.51 | yes |  |  |
| A | LYS | 16 | CE | C | GLY | 10 | C | 3.69 |  | yes |  |
| A | LYS | 16 | NZ | A | PHE | 26 | CE2 | 3.73 | yes |  |  |
| A | LYS | 16 | NZ | A | PHE | 26 | CZ | 3.25 | yes |  |  |
| A | ASP | 17 | C | A | GLY | 18 | C | 3.05 | yes |  |  |
| A | ASP | 17 | C | C | ARG | 8 | CG | 3.46 |  | yes |  |
| A | GLY | 18 | C | A | GLU | 19 | C | 3.56 | yes |  |  |
| A | GLY | 18 | C | A | GLU | 19 | CB | 3.34 | yes |  |  |
| A | GLY | 18 | C | A | GLU | 19 | CG | 3.48 | yes |  |  |
| A | GLU | 19 | C | A | TRP | 20 | C | 3.24 | yes |  |  |
| A | GLU | 19 | C | A | TRP | 20 | CB | 3.61 | yes |  |  |
| A | GLU | 19 | C | A | TRP | 20 | CG | 3.9 | yes |  |  |
| A | TRP | 20 | C | A | VAL | 21 | C | 3.38 | yes |  |  |
| A | TRP | 20 | C | A | VAL | 21 | CB | 3.57 | yes |  |  |
| A | TRP | 20 | C | A | VAL | 21 | CG1 | 3.55 | yes |  |  |
| A | TRP | 20 | CE3 | B | ARG | 15 | CB | 3.95 |  | yes |  |
| A | TRP | 20 | CZ2 | B | ILE | 3 | CD1 | 3.11 |  | yes |  |
| A | TRP | 20 | CZ2 | B | ARG | 15 | CG | 3.96 |  | yes |  |
| A | TRP | 20 | CZ3 | B | ARG | 15 | CB | 3.64 |  | yes |  |
| A | TRP | 20 | CH2 | B | ILE | 3 | CD1 | 3.63 |  | yes |  |
| A | TRP | 20 | CH2 | B | ARG | 15 | CB | 3.79 |  | yes |  |
| A | TRP | 20 | CH2 | B | ARG | 15 | CG | 3.83 |  | yes |  |
| A | TRP | 20 | CH2 | C | TRP | 20 | CH2 | 3.87 |  | yes |  |
| A | VAL | 21 | C | A | LEU | 22 | C | 2.89 | yes |  |  |
| A | VAL | 21 | C | A | LEU | 22 | CB | 3.64 | yes |  |  |
| A | VAL | 21 | CB | A | PHE | 26 | CE1 | 3.89 | yes |  |  |
| A | VAL | 21 | CG2 | A | PHE | 26 | CE1 | 2.99 | yes |  |  |
| A | VAL | 21 | CG2 | A | PHE | 26 | CZ | 3.39 | yes |  |  |
| A | LEU | 22 | C | A | LEU | 23 | C | 2.96 | yes |  |  |
| A | LEU | 22 | C | A | LEU | 23 | CB | 3.68 | yes |  |  |
| A | LEU | 23 | C | A | SER | 24 | C | 2.92 | yes |  |  |
| A | LEU | 23 | C | A | SER | 24 | CB | 3.71 | yes |  |  |
| A | LEU | 23 | CG | B | PHE | 26 | CB | 3.54 |  | yes |  |
| A | LEU | 23 | CG | B | PHE | 26 | CG | 3.6 |  | yes |  |
| A | LEU | 23 | CG | B | PHE | 26 | CD2 | 3.97 |  | yes |  |
| A | LEU | 23 | CD1 | B | LEU | 23 | CD1 | 3.67 |  | yes |  |
| A | LEU | 23 | CD1 | C | LEU | 23 | CD1 | 3.51 |  | yes |  |
| A | LEU | 23 | CD1 | C | LEU | 23 | CD2 | 3.31 |  | yes |  |
| A | LEU | 23 | CD2 | B | VAL | 14 | CB | 3.52 |  | yes |  |
| A | LEU | 23 | CD2 | B | VAL | 14 | CG1 | 3.46 |  | yes |  |
| A | LEU | 23 | CD2 | B | VAL | 14 | CG2 | 3.61 |  | yes |  |
| A | LEU | 23 | CD2 | B | LEU | 23 | CD1 | 3.4 |  | yes |  |
| A | LEU | 23 | CD2 | B | PHE | 26 | CB | 3.25 |  | yes |  |
| A | LEU | 23 | CD2 | B | PHE | 26 | CG | 3.09 |  | yes |  |
| A | LEU | 23 | CD2 | B | PHE | 26 | CD1 | 3.14 |  | yes |  |
| A | LEU | 23 | CD2 | B | PHE | 26 | CD2 | 3.84 |  | yes |  |
| A | LEU | 23 | CD2 | B | PHE | 26 | CE1 | 3.93 |  | yes |  |
| A | SER | 24 | C | A | THR | 25 | C | 3.02 | yes |  |  |
| A | SER | 24 | C | A | THR | 25 | CB | 3.71 | yes |  |  |
| A | THR | 25 | C | A | PHE | 26 | C | 3.32 | yes |  |  |
| A | THR | 25 | C | A | PHE | 26 | CB | 3.62 | yes |  |  |
| A | THR | 25 | C | A | PHE | 26 | CG | 3.9 | yes |  |  |
| A | THR | 25 | C | A | PHE | 26 | CD1 | 3.67 | yes |  |  |
| A | PHE | 26 | C | A | LEU | 27 | C | 3.44 | yes |  |  |
| A | PHE | 26 | C | A | LEU | 27 | CB | 3.47 | yes |  |  |
| A | PHE | 26 | C | A | LEU | 27 | CD1 | 3.83 | yes |  |  |
| A | PHE | 26 | C | C | LEU | 27 | CD2 | 3.39 |  | yes |  |
| A | PHE | 26 | CB | C | LEU | 23 | CG | 3.86 |  | yes |  |
| A | PHE | 26 | CB | C | LEU | 23 | CD2 | 3.22 |  | yes |  |
| A | PHE | 26 | CB | C | LEU | 27 | CD2 | 3.62 |  | yes |  |
| A | PHE | 26 | CG | C | LEU | 23 | CG | 3.82 |  | yes |  |
| A | PHE | 26 | CG | C | LEU | 23 | CD2 | 2.91 |  | yes |  |
| A | PHE | 26 | CD1 | C | LEU | 23 | CD2 | 3.4 |  | yes |  |
| A | PHE | 26 | CD2 | C | LEU | 23 | CG | 3.64 |  | yes |  |
| A | PHE | 26 | CD2 | C | LEU | 23 | CD2 | 3.11 |  | yes |  |
| A | PHE | 26 | CE1 | C | LEU | 23 | CD2 | 4 |  | yes |  |
| A | PHE | 26 | CE2 | C | ALA | 12 | CB | 3.38 |  | yes |  |
| A | PHE | 26 | CE2 | C | LEU | 23 | CD2 | 3.75 |  | yes |  |
| A | PHE | 26 | CZ | C | ALA | 12 | CB | 3.34 |  | yes |  |
| A | LEU | 27 | CD1 | B | LEU | 27 | CD1 | 3.32 |  | yes |  |
| A | LEU | 27 | CD1 | C | LEU | 27 | CD1 | 3.34 |  | yes |  |
| A | LEU | 27 | CD2 | B | PHE | 26 | C | 3.11 |  | yes |  |
| A | LEU | 27 | CD2 | B | PHE | 26 | CB | 3.82 |  | yes |  |
| B | GLY | 1 | C | B | TYR | 2 | C | 3.58 | yes |  |  |
| B | GLY | 1 | C | B | TYR | 2 | CB | 3.39 | yes |  |  |
| B | GLY | 1 | C | B | TYR | 2 | CG | 3.74 | yes |  |  |
| B | GLY | 1 | C | B | TYR | 2 | CD1 | 3.25 | yes |  |  |
| B | TYR | 2 | C | B | ILE | 3 | C | 3.28 | yes |  |  |
| B | TYR | 2 | C | B | ILE | 3 | CB | 3.7 | yes |  |  |
| B | TYR | 2 | C | C | TYR | 2 | CD2 | 3.65 |  | yes |  |
| B | TYR | 2 | C | C | TYR | 2 | CE2 | 3.38 |  | yes |  |
| B | TYR | 2 | CB | C | TYR | 2 | CD2 | 3.24 |  | yes |  |
| B | TYR | 2 | CB | C | TYR | 2 | CE2 | 3.25 |  | yes |  |
| B | ILE | 3 | C | B | PRO | 4 | C | 3.25 | yes |  |  |
| B | ILE | 3 | C | B | PRO | 4 | CB | 3.57 | yes |  |  |
| B | ILE | 3 | C | B | PRO | 4 | CG | 3.65 | yes |  |  |
| B | ILE | 3 | C | B | PRO | 4 | CD | 2.51 | yes |  |  |
| B | ILE | 3 | C | C | TYR | 2 | CB | 3.93 | yes |  |  |
| B | ILE | 3 | C | C | TYR | 2 | CG | 3.5 |  | yes |  |
| B | ILE | 3 | C | C | TYR | 2 | CD1 | 3.67 |  | yes |  |
| B | ILE | 3 | C | C | TYR | 2 | CD2 | 3.75 |  | yes |  |
| B | ILE | 3 | CB | B | PRO | 4 | CD | 3.2 | yes |  |  |
| B | ILE | 3 | CG2 | B | ARG | 15 | CD | 3.8 | yes |  |  |
| B | ILE | 3 | CG2 | B | ARG | 15 | CZ | 3.98 | yes |  |  |
| B | ILE | 3 | CD1 | B | ARG | 15 | CG | 3.28 | yes |  |  |
| B | ILE | 3 | CD1 | B | ARG | 15 | CD | 3.99 | yes |  |  |
| B | ILE | 3 | CD1 | B | TRP | 20 | CZ2 | 3.34 | yes |  |  |
| B | ILE | 3 | CD1 | B | TRP | 20 | CH2 | 3.43 | yes |  |  |
| B | ILE | 3 | CD1 | C | ILE | 3 | CD1 | 3.77 |  | yes |  |
| B | PRO | 4 | C | B | GLU | 5 | C | 3.03 | yes |  |  |
| B | PRO | 4 | C | B | GLU | 5 | CB | 3.71 | yes |  |  |
| B | PRO | 4 | CB | C | TYR | 2 | CD1 | 3.75 |  | yes |  |
| B | PRO | 4 | CB | C | TYR | 2 | CE1 | 3.91 |  | yes |  |
| B | GLU | 5 | C | B | ALA | 6 | C | 3.31 | yes |  |  |
| B | GLU | 5 | C | B | ALA | 6 | CB | 3.65 | yes |  |  |
| B | GLU | 5 | C | B | TRP | 20 | CD1 | 3.83 | yes |  |  |
| B | GLU | 5 | C | C | ILE | 3 | CG2 | 3.94 |  | yes |  |
| B | GLU | 5 | CB | C | TYR | 2 | C | 3.62 |  | yes |  |
| B | GLU | 5 | CB | C | ILE | 3 | CG2 | 3.32 |  | yes |  |
| B | GLU | 5 | CG | C | ILE | 3 | CG2 | 3.4 |  | yes |  |
| B | GLU | 5 | CD | B | ARG | 8 | CZ | 3.65 | yes |  |  |
| B | GLU | 5 | CD | C | ILE | 3 | CG2 | 3.07 |  | yes |  |
| B | ALA | 6 | C | B | PRO | 7 | C | 3 | yes |  |  |
| B | ALA | 6 | C | B | PRO | 7 | CB | 3.67 | yes |  |  |
| B | ALA | 6 | C | B | PRO | 7 | CG | 3.64 | yes |  |  |
| B | ALA | 6 | C | B | PRO | 7 | CD | 2.49 | yes |  |  |
| B | ALA | 6 | CB | B | PRO | 7 | CD | 3.37 | yes |  |  |
| B | ALA | 6 | CB | B | TYR | 13 | CD2 | 3.87 | yes |  |  |
| B | ALA | 6 | CB | B | TRP | 20 | CB | 3.78 | yes |  |  |
| B | ALA | 6 | CB | B | TRP | 20 | CG | 3.11 | yes |  |  |
| B | ALA | 6 | CB | B | TRP | 20 | CD1 | 3.09 | yes |  |  |
| B | ALA | 6 | CB | B | TRP | 20 | CD2 | 3.35 | yes |  |  |
| B | ALA | 6 | CB | B | TRP | 20 | NE1 | 3.32 | yes |  |  |
| B | ALA | 6 | CB | B | TRP | 20 | CE2 | 3.47 | yes |  |  |
| B | PRO | 7 | C | B | ARG | 8 | C | 3.45 | yes |  |  |
| B | PRO | 7 | C | B | ARG | 8 | CB | 3.54 | yes |  |  |
| B | PRO | 7 | C | B | ARG | 8 | CG | 3.96 | yes |  |  |
| B | PRO | 7 | C | B | ARG | 8 | CD | 3.71 | yes |  |  |
| B | PRO | 7 | C | B | ASP | 9 | OD1 | 3.95 | yes |  |  |
| B | PRO | 7 | CB | B | ASP | 9 | OD1 | 3.95 | yes |  |  |
| B | PRO | 7 | CB | B | TYR | 13 | CE2 | 3.87 | yes |  |  |
| B | PRO | 7 | CG | B | TYR | 13 | CE2 | 3.23 | yes |  |  |
| B | PRO | 7 | CG | B | TYR | 13 | CZ | 3.47 | yes |  |  |
| B | PRO | 7 | CD | B | TYR | 13 | CE2 | 3.78 | yes |  |  |
| B | ARG | 8 | C | B | ASP | 9 | C | 3.43 | yes |  |  |
| B | ARG | 8 | C | B | ASP | 9 | CB | 3.54 | yes |  |  |
| B | ARG | 8 | CG | C | ASP | 17 | C | 3.53 |  | yes |  |
| B | ASP | 9 | C | B | GLY | 10 | C | 3.16 | yes |  |  |
| B | ASP | 9 | CG | B | GLN | 11 | CB | 3.61 | yes |  |  |
| B | GLY | 10 | C | B | GLN | 11 | C | 3.3 | yes |  |  |
| B | GLY | 10 | C | B | GLN | 11 | CB | 3.59 | yes |  |  |
| B | GLY | 10 | C | C | LYS | 16 | CG | 3.64 |  | yes |  |
| B | GLY | 10 | C | C | LYS | 16 | CE | 3.58 |  | yes |  |
| B | GLN | 11 | C | B | ALA | 12 | C | 3.26 | yes |  |  |
| B | GLN | 11 | C | B | ALA | 12 | CB | 3.61 | yes |  |  |
| B | GLN | 11 | C | C | LYS | 16 | CB | 3.31 |  | yes |  |
| B | GLN | 11 | C | C | LYS | 16 | CG | 3.57 |  | yes |  |
| B | GLN | 11 | CB | B | LEU | 22 | CD2 | 3.28 | yes |  |  |
| B | GLN | 11 | CG | B | LEU | 22 | CD1 | 3.79 | yes |  |  |
| B | GLN | 11 | CG | B | LEU | 22 | CD2 | 3.47 | yes |  |  |
| B | GLN | 11 | CD | B | LEU | 22 | CD1 | 3.66 | yes |  |  |
| B | GLN | 11 | CD | B | LEU | 22 | CD2 | 3.35 | yes |  |  |
| B | ALA | 12 | C | B | TYR | 13 | C | 3.45 | yes |  |  |
| B | ALA | 12 | C | B | TYR | 13 | CB | 3.46 | yes |  |  |
| B | ALA | 12 | C | B | TYR | 13 | CG | 3.67 | yes |  |  |
| B | ALA | 12 | C | B | TYR | 13 | CD2 | 3.97 | yes |  |  |
| B | ALA | 12 | C | B | LEU | 22 | CD2 | 3.62 | yes |  |  |
| B | ALA | 12 | C | C | VAL | 14 | CG1 | 3.92 |  | yes |  |
| B | ALA | 12 | CB | B | LEU | 23 | CB | 3.75 | yes |  |  |
| B | ALA | 12 | CB | C | VAL | 14 | CB | 3.96 |  | yes |  |
| B | ALA | 12 | CB | C | VAL | 14 | CG1 | 3.43 |  | yes |  |
| B | ALA | 12 | CB | C | LYS | 16 | CB | 3.91 |  | yes |  |
| B | ALA | 12 | CB | C | PHE | 26 | CE1 | 3.84 |  | yes |  |
| B | ALA | 12 | CB | C | PHE | 26 | CE2 | 3.24 |  | yes |  |
| B | ALA | 12 | CB | C | PHE | 26 | CZ | 3.02 |  | yes |  |
| B | TYR | 13 | C | B | VAL | 14 | C | 3.31 | yes |  |  |
| B | TYR | 13 | C | B | VAL | 14 | CB | 3.46 | yes |  |  |
| B | TYR | 13 | C | B | VAL | 14 | CG1 | 3.91 | yes |  |  |
| B | TYR | 13 | C | B | TRP | 20 | CE3 | 3.99 | yes |  |  |
| B | TYR | 13 | C | C | VAL | 14 | CG1 | 3.59 |  | yes |  |
| B | TYR | 13 | CB | B | TRP | 20 | CB | 3.5 | yes |  |  |
| B | TYR | 13 | CB | B | TRP | 20 | CE3 | 3.52 | yes |  |  |
| B | TYR | 13 | CG | B | TRP | 20 | C | 3.89 | yes |  |  |
| B | TYR | 13 | CG | B | TRP | 20 | CB | 3.37 | yes |  |  |
| B | TYR | 13 | CD1 | B | TRP | 20 | C | 3.13 | yes |  |  |
| B | TYR | 13 | CD1 | B | TRP | 20 | CB | 3.44 | yes |  |  |
| B | TYR | 13 | CD1 | B | VAL | 21 | C | 3.18 | yes |  |  |
| B | TYR | 13 | CE1 | B | TRP | 20 | C | 3.77 | yes |  |  |
| B | TYR | 13 | CE1 | B | VAL | 21 | C | 3.91 | yes |  |  |
| B | VAL | 14 | C | B | ARG | 15 | C | 3.28 | yes |  |  |
| B | VAL | 14 | C | B | ARG | 15 | CB | 3.52 | yes |  |  |
| B | VAL | 14 | C | B | TRP | 20 | CE3 | 3.46 | yes |  |  |
| B | VAL | 14 | C | B | TRP | 20 | CZ3 | 3.59 | yes |  |  |
| B | VAL | 14 | CG1 | B | VAL | 21 | C | 3.66 | yes |  |  |
| B | VAL | 14 | CG1 | B | VAL | 21 | CB | 3.86 | yes |  |  |
| B | VAL | 14 | CG1 | B | PHE | 26 | CD1 | 3.32 | yes |  |  |
| B | VAL | 14 | CG1 | B | PHE | 26 | CE1 | 3.15 | yes |  |  |
| B | VAL | 14 | CG2 | B | ARG | 15 | C | 3.99 | yes |  |  |
| B | ARG | 15 | C | B | LYS | 16 | C | 3.61 | yes |  |  |
| B | ARG | 15 | C | B | LYS | 16 | CB | 3.34 | yes |  |  |
| B | ARG | 15 | CB | B | TRP | 20 | CZ3 | 3.36 | yes |  |  |
| B | ARG | 15 | CB | B | TRP | 20 | CH2 | 3.69 | yes |  |  |
| B | ARG | 15 | CG | B | TRP | 20 | CE3 | 3.88 | yes |  |  |
| B | ARG | 15 | CG | B | TRP | 20 | CZ2 | 3.6 | yes |  |  |
| B | ARG | 15 | CG | B | TRP | 20 | CZ3 | 3.19 | yes |  |  |
| B | ARG | 15 | CG | B | TRP | 20 | CH2 | 3.03 | yes |  |  |
| B | ARG | 15 | CD | B | TRP | 20 | CH2 | 3.93 | yes |  |  |
| B | LYS | 16 | C | B | ASP | 17 | C | 2.95 | yes |  |  |
| B | LYS | 16 | C | B | ASP | 17 | CB | 3.15 | yes |  |  |
| B | LYS | 16 | C | B | ASP | 17 | CG | 2.9 | yes |  |  |
| B | LYS | 16 | CB | B | ASP | 17 | CG | 3.9 | yes |  |  |
| B | LYS | 16 | CB | B | VAL | 21 | CG2 | 3.91 | yes |  |  |
| B | LYS | 16 | CG | B | ASP | 17 | CG | 2.92 | yes |  |  |
| B | ASP | 17 | C | B | GLY | 18 | C | 3.07 | yes |  |  |
| B | GLY | 18 | C | B | GLU | 19 | C | 3.57 | yes |  |  |
| B | GLY | 18 | C | B | GLU | 19 | CB | 3.35 | yes |  |  |
| B | GLY | 18 | C | B | GLU | 19 | CG | 3.33 | yes |  |  |
| B | GLU | 19 | C | B | TRP | 20 | C | 3.26 | yes |  |  |
| B | GLU | 19 | C | B | TRP | 20 | CB | 3.61 | yes |  |  |
| B | GLU | 19 | C | B | TRP | 20 | CG | 3.84 | yes |  |  |
| B | TRP | 20 | C | B | VAL | 21 | C | 3.41 | yes |  |  |
| B | TRP | 20 | C | B | VAL | 21 | CB | 3.57 | yes |  |  |
| B | TRP | 20 | C | B | VAL | 21 | CG2 | 3.69 | yes |  |  |
| B | TRP | 20 | CZ2 | C | ILE | 3 | CD1 | 3 |  | yes |  |
| B | TRP | 20 | CZ3 | C | ARG | 15 | CB | 3.68 |  | yes |  |
| B | TRP | 20 | CH2 | C | ILE | 3 | CD1 | 3.34 |  | yes |  |
| B | TRP | 20 | CH2 | C | ARG | 15 | CB | 3.84 |  | yes |  |
| B | TRP | 20 | CH2 | C | TRP | 20 | CH2 | 3.97 |  | yes |  |
| B | VAL | 21 | CB | B | PHE | 26 | CE1 | 3.98 | yes |  |  |
| B | VAL | 21 | CG1 | B | PHE | 26 | CE1 | 3.91 | yes |  |  |
| B | LEU | 22 | C | B | LEU | 23 | C | 2.93 | yes |  |  |
| B | LEU | 22 | C | B | LEU | 23 | CB | 3.7 | yes |  |  |
| B | LEU | 23 | C | B | SER | 24 | C | 2.98 | yes |  |  |
| B | LEU | 23 | C | B | SER | 24 | CB | 3.69 | yes |  |  |
| B | LEU | 23 | CB | C | VAL | 14 | CG1 | 3.53 |  | yes |  |
| B | LEU | 23 | CG | C | VAL | 14 | CG1 | 3.87 |  | yes |  |
| B | LEU | 23 | CG | C | PHE | 26 | CB | 3.65 |  | yes |  |
| B | LEU | 23 | CG | C | PHE | 26 | CG | 3.56 |  | yes |  |
| B | LEU | 23 | CG | C | PHE | 26 | CD2 | 3.64 |  | yes |  |
| B | LEU | 23 | CD1 | C | LEU | 23 | CD1 | 3.53 |  | yes |  |
| B | LEU | 23 | CD2 | C | VAL | 14 | CB | 3.77 |  | yes |  |
| B | LEU | 23 | CD2 | C | VAL | 14 | CG1 | 3.1 |  | yes |  |
| B | LEU | 23 | CD2 | C | VAL | 14 | CG2 | 3.36 |  | yes |  |
| B | LEU | 23 | CD2 | C | LEU | 23 | CD1 | 3.42 |  | yes |  |
| B | LEU | 23 | CD2 | C | PHE | 26 | CB | 3.25 |  | yes |  |
| B | LEU | 23 | CD2 | C | PHE | 26 | CG | 2.92 |  | yes |  |
| B | LEU | 23 | CD2 | C | PHE | 26 | CD1 | 3.09 |  | yes |  |
| B | LEU | 23 | CD2 | C | PHE | 26 | CD2 | 3.41 |  | yes |  |
| B | LEU | 23 | CD2 | C | PHE | 26 | CE1 | 3.71 |  | yes |  |
| B | LEU | 23 | CD2 | C | PHE | 26 | CE2 | 3.97 |  | yes |  |
| B | SER | 24 | C | B | THR | 25 | C | 3.01 | yes |  |  |
| B | SER | 24 | C | B | THR | 25 | CB | 3.72 | yes |  |  |
| B | SER | 24 | C | B | LEU | 27 | CB | 3.88 | yes |  |  |
| B | THR | 25 | C | B | PHE | 26 | C | 3.31 | yes |  |  |
| B | THR | 25 | C | B | PHE | 26 | CB | 3.61 | yes |  |  |
| B | THR | 25 | C | B | PHE | 26 | CG | 3.82 | yes |  |  |
| B | THR | 25 | C | B | PHE | 26 | CD1 | 3.9 | yes |  |  |
| B | PHE | 26 | C | B | LEU | 27 | C | 3.55 | yes |  |  |
| B | PHE | 26 | C | B | LEU | 27 | CB | 3.35 | yes |  |  |
| B | PHE | 26 | C | B | LEU | 27 | CD1 | 3.49 | yes |  |  |
| B | LEU | 27 | CD1 | C | LEU | 27 | CD1 | 3.48 |  | yes |  |
| B | LEU | 27 | CD2 | C | PHE | 26 | C | 3.56 |  | yes |  |
| B | LEU | 27 | CD2 | C | PHE | 26 | CB | 3.64 |  | yes |  |
| C | GLY | 1 | C | C | TYR | 2 | C | 3.38 | yes |  |  |
| C | GLY | 1 | C | C | TYR | 2 | CB | 3.6 | yes |  |  |
| C | GLY | 1 | C | C | TYR | 2 | CG | 3.92 | yes |  |  |
| C | GLY | 1 | C | C | TYR | 2 | CD1 | 3.35 | yes |  |  |
| C | TYR | 2 | C | C | ILE | 3 | C | 3.24 | yes |  |  |
| C | TYR | 2 | C | C | ILE | 3 | CB | 3.73 | yes |  |  |
| C | ILE | 3 | C | C | PRO | 4 | C | 3.21 | yes |  |  |
| C | ILE | 3 | C | C | PRO | 4 | CB | 3.61 | yes |  |  |
| C | ILE | 3 | C | C | PRO | 4 | CG | 3.59 | yes |  |  |
| C | ILE | 3 | C | C | PRO | 4 | CD | 2.5 | yes |  |  |
| C | ILE | 3 | CB | C | PRO | 4 | CD | 3.36 | yes |  |  |
| C | ILE | 3 | CB | C | ARG | 15 | CZ | 3.62 | yes |  |  |
| C | ILE | 3 | CG1 | C | TRP | 20 | CZ2 | 3.98 | yes |  |  |
| C | ILE | 3 | CG2 | C | ARG | 15 | CG | 3.73 | yes |  |  |
| C | ILE | 3 | CG2 | C | ARG | 15 | CD | 3.87 | yes |  |  |
| C | ILE | 3 | CG2 | C | ARG | 15 | CZ | 3.17 | yes |  |  |
| C | ILE | 3 | CD1 | C | ARG | 15 | CG | 3.27 | yes |  |  |
| C | ILE | 3 | CD1 | C | TRP | 20 | CZ2 | 3.19 | yes |  |  |
| C | ILE | 3 | CD1 | C | TRP | 20 | CH2 | 3.33 | yes |  |  |
| C | PRO | 4 | C | C | GLU | 5 | C | 3.07 | yes |  |  |
| C | PRO | 4 | C | C | GLU | 5 | CB | 3.73 | yes |  |  |
| C | PRO | 4 | CD | C | ARG | 15 | CZ | 3.62 | yes |  |  |
| C | GLU | 5 | C | C | ALA | 6 | C | 3.24 | yes |  |  |
| C | GLU | 5 | C | C | ALA | 6 | CB | 3.67 | yes |  |  |
| C | GLU | 5 | C | C | TRP | 20 | CD1 | 3.88 | yes |  |  |
| C | GLU | 5 | CG | C | ALA | 6 | C | 4 | yes |  |  |
| C | ALA | 6 | C | C | PRO | 7 | C | 3.07 | yes |  |  |
| C | ALA | 6 | C | C | PRO | 7 | CB | 3.67 | yes |  |  |
| C | ALA | 6 | C | C | PRO | 7 | CG | 3.64 | yes |  |  |
| C | ALA | 6 | C | C | PRO | 7 | CD | 2.5 | yes |  |  |
| C | ALA | 6 | CB | C | PRO | 7 | CD | 3.14 | yes |  |  |
| C | ALA | 6 | CB | C | TYR | 13 | CD2 | 3.79 | yes |  |  |
| C | ALA | 6 | CB | C | TRP | 20 | CB | 3.88 | yes |  |  |
| C | ALA | 6 | CB | C | TRP | 20 | CG | 3.36 | yes |  |  |
| C | ALA | 6 | CB | C | TRP | 20 | CD1 | 3.45 | yes |  |  |
| C | ALA | 6 | CB | C | TRP | 20 | CD2 | 3.62 | yes |  |  |
| C | ALA | 6 | CB | C | TRP | 20 | CE2 | 3.84 | yes |  |  |
| C | PRO | 7 | C | C | ARG | 8 | C | 3.45 | yes |  |  |
| C | PRO | 7 | C | C | ARG | 8 | CB | 3.53 | yes |  |  |
| C | PRO | 7 | C | C | ARG | 8 | CG | 3.93 | yes |  |  |
| C | PRO | 7 | C | C | ARG | 8 | CD | 3.55 | yes |  |  |
| C | PRO | 7 | CB | C | TYR | 13 | CE2 | 3.76 | yes |  |  |
| C | PRO | 7 | CG | C | TYR | 13 | CE2 | 3.32 | yes |  |  |
| C | PRO | 7 | CG | C | TYR | 13 | CZ | 3.57 | yes |  |  |
| C | PRO | 7 | CD | C | TYR | 13 | CD2 | 3.47 | yes |  |  |
| C | PRO | 7 | CD | C | TYR | 13 | CE2 | 3.28 | yes |  |  |
| C | PRO | 7 | CD | C | TYR | 13 | CZ | 3.88 | yes |  |  |
| C | ARG | 8 | C | C | ASP | 9 | C | 3.37 | yes |  |  |
| C | ARG | 8 | C | C | ASP | 9 | CB | 3.57 | yes |  |  |
| C | ASP | 9 | C | C | GLY | 10 | C | 3.18 | yes |  |  |
| C | ASP | 9 | CG | C | GLN | 11 | CG | 3.36 | yes |  |  |
| C | GLY | 10 | C | C | GLN | 11 | C | 3.33 | yes |  |  |
| C | GLY | 10 | C | C | GLN | 11 | CB | 3.55 | yes |  |  |
| C | GLY | 10 | C | C | GLN | 11 | CG | 3.67 | yes |  |  |
| C | GLN | 11 | C | C | ALA | 12 | C | 3.25 | yes |  |  |
| C | GLN | 11 | C | C | ALA | 12 | CB | 3.64 | yes |  |  |
| C | GLN | 11 | C | C | LEU | 22 | CD2 | 3.97 | yes |  |  |
| C | GLN | 11 | CB | C | TYR | 13 | CE2 | 3.93 | yes |  |  |
| C | GLN | 11 | CB | C | LEU | 22 | CD2 | 3.47 | yes |  |  |
| C | ALA | 12 | C | C | TYR | 13 | C | 3.47 | yes |  |  |
| C | ALA | 12 | C | C | TYR | 13 | CB | 3.44 | yes |  |  |
| C | ALA | 12 | C | C | TYR | 13 | CG | 3.57 | yes |  |  |
| C | ALA | 12 | C | C | TYR | 13 | CD2 | 3.73 | yes |  |  |
| C | ALA | 12 | C | C | LEU | 22 | CD2 | 3.67 | yes |  |  |
| C | ALA | 12 | CB | C | LEU | 23 | CB | 3.94 | yes |  |  |
| C | TYR | 13 | C | C | VAL | 14 | C | 3.34 | yes |  |  |
| C | TYR | 13 | C | C | VAL | 14 | CB | 3.49 | yes |  |  |
| C | TYR | 13 | C | C | VAL | 14 | CG2 | 3.35 | yes |  |  |
| C | TYR | 13 | C | C | TRP | 20 | CE3 | 3.77 | yes |  |  |
| C | TYR | 13 | CB | C | TRP | 20 | C | 3.99 | yes |  |  |
| C | TYR | 13 | CB | C | TRP | 20 | CB | 3.39 | yes |  |  |
| C | TYR | 13 | CB | C | TRP | 20 | CG | 3.98 | yes |  |  |
| C | TYR | 13 | CB | C | TRP | 20 | CD2 | 3.94 | yes |  |  |
| C | TYR | 13 | CB | C | TRP | 20 | CE3 | 3.45 | yes |  |  |
| C | TYR | 13 | CG | C | TRP | 20 | C | 3.93 | yes |  |  |
| C | TYR | 13 | CG | C | TRP | 20 | CB | 3.47 | yes |  |  |
| C | TYR | 13 | CD1 | C | TRP | 20 | C | 3.23 | yes |  |  |
| C | TYR | 13 | CD1 | C | TRP | 20 | CB | 3.59 | yes |  |  |
| C | TYR | 13 | CD1 | C | VAL | 21 | C | 3.19 | yes |  |  |
| C | TYR | 13 | CE1 | C | TRP | 20 | C | 3.99 | yes |  |  |
| C | TYR | 13 | CE1 | C | VAL | 21 | C | 3.91 | yes |  |  |
| C | TYR | 13 | CE1 | C | LEU | 22 | CG | 3.9 | yes |  |  |
| C | VAL | 14 | C | C | ARG | 15 | C | 3.22 | yes |  |  |
| C | VAL | 14 | C | C | ARG | 15 | CB | 3.56 | yes |  |  |
| C | VAL | 14 | C | C | TRP | 20 | CE3 | 3.46 | yes |  |  |
| C | VAL | 14 | C | C | TRP | 20 | CZ3 | 3.63 | yes |  |  |
| C | VAL | 14 | CG2 | C | VAL | 21 | C | 3.78 | yes |  |  |
| C | VAL | 14 | CG2 | C | LEU | 22 | C | 3.79 | yes |  |  |
| C | VAL | 14 | CG2 | C | LEU | 23 | CB | 3.93 | yes |  |  |
| C | VAL | 14 | CG2 | C | PHE | 26 | CD1 | 3.91 | yes |  |  |
| C | VAL | 14 | CG2 | C | PHE | 26 | CE1 | 3.83 | yes |  |  |
| C | ARG | 15 | C | C | LYS | 16 | C | 3.67 | yes |  |  |
| C | ARG | 15 | C | C | LYS | 16 | CB | 3.24 | yes |  |  |
| C | ARG | 15 | CB | C | TRP | 20 | CZ3 | 3.35 | yes |  |  |
| C | ARG | 15 | CB | C | TRP | 20 | CH2 | 3.58 | yes |  |  |
| C | ARG | 15 | CG | C | TRP | 20 | CE3 | 3.92 | yes |  |  |
| C | ARG | 15 | CG | C | TRP | 20 | CZ2 | 3.5 | yes |  |  |
| C | ARG | 15 | CG | C | TRP | 20 | CZ3 | 3.37 | yes |  |  |
| C | ARG | 15 | CG | C | TRP | 20 | CH2 | 3.14 | yes |  |  |
| C | ARG | 15 | CD | C | GLU | 19 | C | 3.71 | yes |  |  |
| C | ARG | 15 | CD | C | TRP | 20 | CD2 | 3.79 | yes |  |  |
| C | ARG | 15 | CD | C | TRP | 20 | CE2 | 3.74 | yes |  |  |
| C | ARG | 15 | CD | C | TRP | 20 | CE3 | 3.85 | yes |  |  |
| C | ARG | 15 | CD | C | TRP | 20 | CZ2 | 3.75 | yes |  |  |
| C | ARG | 15 | CD | C | TRP | 20 | CZ3 | 3.84 | yes |  |  |
| C | ARG | 15 | CD | C | TRP | 20 | CH2 | 3.79 | yes |  |  |
| C | ARG | 15 | CZ | C | GLY | 18 | C | 2.92 | yes |  |  |
| C | LYS | 16 | C | C | ASP | 17 | C | 2.97 | yes |  |  |
| C | LYS | 16 | C | C | ASP | 17 | CB | 2.99 | yes |  |  |
| C | LYS | 16 | CG | C | ASP | 17 | CB | 3.92 | yes |  |  |
| C | LYS | 16 | CD | C | VAL | 21 | CG2 | 3.72 | yes |  |  |
| C | ASP | 17 | C | C | GLY | 18 | C | 3.04 | yes |  |  |
| C | GLY | 18 | C | C | GLU | 19 | C | 3.57 | yes |  |  |
| C | GLY | 18 | C | C | GLU | 19 | CB | 3.34 | yes |  |  |
| C | GLY | 18 | C | C | GLU | 19 | CG | 3.49 | yes |  |  |
| C | GLU | 19 | C | C | TRP | 20 | C | 3.29 | yes |  |  |
| C | GLU | 19 | C | C | TRP | 20 | CB | 3.6 | yes |  |  |
| C | GLU | 19 | C | C | TRP | 20 | CG | 3.83 | yes |  |  |
| C | TRP | 20 | C | C | VAL | 21 | C | 3.38 | yes |  |  |
| C | TRP | 20 | C | C | VAL | 21 | CB | 3.6 | yes |  |  |
| C | TRP | 20 | C | C | VAL | 21 | CG2 | 3.73 | yes |  |  |
| C | VAL | 21 | C | C | LEU | 22 | C | 2.94 | yes |  |  |
| C | VAL | 21 | C | C | LEU | 22 | CB | 3.65 | yes |  |  |
| C | VAL | 21 | CG1 | C | PHE | 26 | CE1 | 3.84 | yes |  |  |
| C | LEU | 22 | C | C | LEU | 23 | C | 3 | yes |  |  |
| C | LEU | 22 | C | C | LEU | 23 | CB | 3.69 | yes |  |  |
| C | LEU | 23 | C | C | SER | 24 | C | 3.02 | yes |  |  |
| C | LEU | 23 | C | C | SER | 24 | CB | 3.71 | yes |  |  |
| C | SER | 24 | C | C | THR | 25 | C | 2.98 | yes |  |  |
| C | SER | 24 | C | C | THR | 25 | CB | 3.71 | yes |  |  |
| C | THR | 25 | C | C | PHE | 26 | C | 3.36 | yes |  |  |
| C | THR | 25 | C | C | PHE | 26 | CB | 3.59 | yes |  |  |
| C | THR | 25 | C | C | PHE | 26 | CG | 3.81 | yes |  |  |
| C | THR | 25 | C | C | PHE | 26 | CD1 | 3.74 | yes |  |  |
| C | PHE | 26 | C | C | LEU | 27 | C | 3.51 | yes |  |  |
| C | PHE | 26 | C | C | LEU | 27 | CB | 3.41 | yes |  |  |
| C | PHE | 26 | C | C | LEU | 27 | CD1 | 3.55 | yes |  |  |
|  |  |  |  |  |  |  |  | **sums** | **417** | **162** | **579** |

**Table S10:** Van der Waals contacts (no heteroatoms) in the foldon 1 trimer.

| Residue 1 | Atom 1 | Residue 2 | Atom 2 | Distance | intracatenane | intercatenane | total |
| --- | --- | --- | --- | --- | --- | --- | --- |
| GLY 1 (A) | C | TYR 2 (A) | C | 3.09 | yes |  |  |
| GLY 1 (A) | C | TYR 2 (A) | CB | 3.68 | yes |  |  |
| TYR 2 (A) | C | ILE 3 (A) | C | 3.17 | yes |  |  |
| TYR 2 (A) | C | ILE 3 (A) | CB | 3.75 | yes |  |  |
| TYR 2 (A) | C | TYR 2 (C) | CD1 | 3.66 |  | yes |  |
| TYR 2 (A) | C | TYR 2 (C) | CE1 | 3.78 |  | yes |  |
| TYR 2 (A) | CB | TYR 2 (C) | CG | 3.7 |  | yes |  |
| TYR 2 (A) | CB | TYR 2 (C) | CD1 | 3.6 |  | yes |  |
| TYR 2 (A) | CB | TYR 2 (C) | CD2 | 3.99 |  | yes |  |
| TYR 2 (A) | CB | TYR 2 (C) | CE1 | 3.85 |  | yes |  |
| TYR 2 (A) | CG | TYR 2 (B) | CB | 3.65 |  | yes |  |
| TYR 2 (A) | CD1 | TYR 2 (B) | CB | 3.53 |  | yes |  |
| TYR 2 (A) | CD1 | ILE 3 (B) | C | 3.74 |  | yes |  |
| TYR 2 (A) | CD2 | TYR 2 (B) | CD2 | 3.87 |  | yes |  |
| TYR 2 (A) | CE1 | TYR 2 (B) | CB | 3.94 |  | yes |  |
| ILE 3 (A) | C | PRO 4 (A) | C | 3.27 | yes |  |  |
| ILE 3 (A) | C | PRO 4 (A) | CB | 3.57 | yes |  |  |
| ILE 3 (A) | C | PRO 4 (A) | CG | 3.67 | yes |  |  |
| ILE 3 (A) | C | PRO 4 (A) | CD | 2.53 | yes |  |  |
| ILE 3 (A) | C | TYR 2 (C) | CD1 | 3.81 |  | yes |  |
| ILE 3 (A) | CB | ILE 3 (B) | CB | 3.99 |  | yes |  |
| ILE 3 (A) | CG1 | ILE 3 (B) | C | 3.99 |  | yes |  |
| ILE 3 (A) | CG1 | ILE 3 (B) | CB | 3.7 |  | yes |  |
| ILE 3 (A) | CG1 | ILE 3 (B) | CG2 | 3.58 |  | yes |  |
| ILE 3 (A) | CG1 | TRP 20 (B) | CZ2 | 3.63 |  | yes |  |
| ILE 3 (A) | CG2 | PRO 4 (A) | CD | 3.97 | yes |  |  |
| ILE 3 (A) | CG2 | TRP 20 (A) | CZ2 | 3.3 | yes |  |  |
| ILE 3 (A) | CG2 | ILE 3 (C) | CG1 | 3.9 |  | yes |  |
| ILE 3 (A) | CG2 | ILE 3 (C) | CD1 | 3.77 |  | yes |  |
| ILE 3 (A) | CD1 | ARG 15 (A) | CD | 3.85 | yes |  |  |
| ILE 3 (A) | CD1 | ARG 15 (A) | CZ | 3.9 | yes |  |  |
| ILE 3 (A) | CD1 | GLU 5 (B) | CD | 3.99 |  | yes |  |
| ILE 3 (A) | CD1 | TRP 20 (B) | CZ2 | 3.55 |  | yes |  |
| PRO 4 (A) | C | GLU 5 (A) | C | 3.09 | yes |  |  |
| PRO 4 (A) | C | GLU 5 (A) | CB | 3.7 | yes |  |  |
| PRO 4 (A) | C | ILE 3 (C) | CG2 | 3.92 |  | yes |  |
| GLU 5 (A) | C | ALA 6 (A) | C | 3.26 | yes |  |  |
| GLU 5 (A) | C | ALA 6 (A) | CB | 3.66 | yes |  |  |
| GLU 5 (A) | C | TRP 20 (A) | CD1 | 3.85 | yes |  |  |
| GLU 5 (A) | CB | ILE 3 (C) | CG2 | 3.87 |  | yes |  |
| GLU 5 (A) | CD | ILE 3 (C) | CG2 | 3.78 |  | yes |  |
| ALA 6 (A) | C | PRO 7 (A) | C | 3.03 | yes |  |  |
| ALA 6 (A) | C | PRO 7 (A) | CB | 3.61 | yes |  |  |
| ALA 6 (A) | C | PRO 7 (A) | CG | 3.6 | yes |  |  |
| ALA 6 (A) | C | PRO 7 (A) | CD | 2.53 | yes |  |  |
| ALA 6 (A) | CB | PRO 7 (A) | CD | 3.29 | yes |  |  |
| ALA 6 (A) | CB | TRP 20 (A) | CG | 3.65 | yes |  |  |
| ALA 6 (A) | CB | TRP 20 (A) | CD1 | 3.7 | yes |  |  |
| ALA 6 (A) | CB | TRP 20 (A) | CD2 | 3.71 | yes |  |  |
| ALA 6 (A) | CB | TRP 20 (A) | CE2 | 3.8 | yes |  |  |
| ALA 6 (A) | CB | ARG 15 (C) | CG | 3.75 |  | yes |  |
| PRO 7 (A) | C | ARG 8 (A) | C | 3.36 | yes |  |  |
| PRO 7 (A) | C | ARG 8 (A) | CB | 3.66 | yes |  |  |
| PRO 7 (A) | C | ARG 8 (A) | CG | 3.93 | yes |  |  |
| PRO 7 (A) | CB | TYR 13 (A) | CE2 | 3.88 | yes |  |  |
| PRO 7 (A) | CB | TYR 13 (A) | CZ | 3.82 | yes |  |  |
| PRO 7 (A) | CG | TYR 13 (A) | CE1 | 3.89 | yes |  |  |
| PRO 7 (A) | CG | TYR 13 (A) | CE2 | 3.95 | yes |  |  |
| PRO 7 (A) | CG | TYR 13 (A) | CZ | 3.58 | yes |  |  |
| PRO 7 (A) | CD | TYR 13 (A) | CD2 | 3.95 | yes |  |  |
| PRO 7 (A) | CD | TYR 13 (A) | CE1 | 3.91 | yes |  |  |
| PRO 7 (A) | CD | TYR 13 (A) | CE2 | 3.76 | yes |  |  |
| PRO 7 (A) | CD | TYR 13 (A) | CZ | 3.76 | yes |  |  |
| ARG 8 (A) | C | ASP 9 (A) | C | 3.22 | yes |  |  |
| ARG 8 (A) | C | ASP 9 (A) | CB | 3.66 | yes |  |  |
| ASP 9 (A) | CG | TYR 13 (A) | CE2 | 3.96 | yes |  |  |
| GLN 11 (A) | C | ALA 12 (A) | C | 3.24 | yes |  |  |
| GLN 11 (A) | C | ALA 12 (A) | CB | 3.66 | yes |  |  |
| GLN 11 (A) | C | TYR 13 (A) | CD2 | 3.92 | yes |  |  |
| GLN 11 (A) | C | TYR 13 (A) | CE2 | 3.98 | yes |  |  |
| GLN 11 (A) | C | LYS 16 (C) | CG | 3.84 | yes |  |  |
| GLN 11 (A) | CB | LEU 22 (A) | CD2 | 3.39 | yes |  |  |
| GLN 11 (A) | CG | LEU 22 (A) | CD2 | 3.91 | yes |  |  |
| ALA 12 (A) | C | TYR 13 (A) | C | 3.57 | yes |  |  |
| ALA 12 (A) | C | TYR 13 (A) | CB | 3.46 | yes |  |  |
| ALA 12 (A) | C | TYR 13 (A) | CG | 3.62 | yes |  |  |
| ALA 12 (A) | C | TYR 13 (A) | CD2 | 3.55 | yes |  |  |
| ALA 12 (A) | CB | VAL 14 (C) | CG2 | 3.82 |  | yes |  |
| ALA 12 (A) | CB | PHE 26 (C) | CE2 | 3.94 |  | yes |  |
| ALA 12 (A) | CB | PHE 26 (C) | CZ | 3.8 |  | yes |  |
| TYR 13 (A) | C | VAL 14 (A) | C | 3.48 | yes |  |  |
| TYR 13 (A) | C | VAL 14 (A) | CB | 3.55 | yes |  |  |
| TYR 13 (A) | C | VAL 14 (A) | CG1 | 3.62 | yes |  |  |
| TYR 13 (A) | C | TRP 20 (A) | CE3 | 3.95 | yes |  |  |
| TYR 13 (A) | CB | TRP 20 (A) | CE3 | 3.7 | yes |  |  |
| TYR 13 (A) | CD1 | TRP 20 (A) | C | 3.79 | yes |  |  |
| TYR 13 (A) | CD1 | TRP 20 (A) | CB | 3.83 | yes |  |  |
| TYR 13 (A) | CD1 | VAL 21 (A) | C | 3.47 | yes |  |  |
| TYR 13 (A) | CE1 | LEU 22 (A) | CG | 3.85 | yes |  |  |
| TYR 13 (A) | CE1 | LEU 22 (A) | CD2 | 3.71 | yes |  |  |
| TYR 13 (A) | CZ | LEU 22 (A) | CD2 | 3.51 | yes |  |  |
| VAL 14 (A) | C | ARG 15 (A) | C | 3.36 | yes |  |  |
| VAL 14 (A) | C | ARG 15 (A) | CB | 3.57 | yes |  |  |
| VAL 14 (A) | C | TRP 20 (A) | CE3 | 3.61 | yes |  |  |
| VAL 14 (A) | C | TRP 20 (A) | CZ3 | 3.93 | yes |  |  |
| VAL 14 (A) | CG1 | LEU 23 (A) | CD1 | 3.67 | yes |  |  |
| VAL 14 (A) | CG1 | VAL 14 (B) | CG1 | 3.83 |  | yes |  |
| VAL 14 (A) | CG1 | VAL 14 (C) | CG1 | 3.85 |  | yes |  |
| VAL 14 (A) | CG2 | PHE 26 (A) | CD2 | 3.84 | yes |  |  |
| VAL 14 (A) | CG2 | PHE 26 (A) | CE2 | 3.48 | yes |  |  |
| VAL 14 (A) | CG2 | ALA 12 (B) | CB | 3.94 |  | yes |  |
| ARG 15 (A) | C | LYS 16 (A) | C | 3.63 | yes |  |  |
| ARG 15 (A) | C | LYS 16 (A) | CB | 3.24 | yes |  |  |
| ARG 15 (A) | CB | TRP 20 (B) | CZ3 | 3.78 |  | yes |  |
| ARG 15 (A) | CB | TRP 20 (B) | CH2 | 3.85 |  | yes |  |
| ARG 15 (A) | CG | GLU 5 (B) | OE2 | 3.54 |  | yes |  |
| ARG 15 (A) | CG | ALA 6 (B) | CB | 3.77 |  | yes |  |
| ARG 15 (A) | CD | GLU 19 (A) | C | 3.95 | yes |  |  |
| ARG 15 (A) | CZ | GLY 18 (A) | C | 3.54 | yes |  |  |
| LYS 16 (A) | CG | GLN 11 (B) | C | 3.97 |  | yes |  |
| LYS 16 (A) | CD | PHE 26 (A) | CZ | 3.73 | yes |  |  |
| GLY 18 (A) | C | GLU 19 (A) | C | 3.6 | yes |  |  |
| GLY 18 (A) | C | GLU 19 (A) | CB | 3.38 | yes |  |  |
| GLY 18 (A) | C | GLU 19 (A) | CG | 3.38 | yes |  |  |
| GLY 18 (A) | C | GLU 19 (A) | CD | 3.73 | yes |  |  |
| GLY 18 (A) | C | GLU 19 (A) | OE2 | 3.99 | yes |  |  |
| GLU 19 (A) | C | TRP 20 (A) | C | 3.21 | yes |  |  |
| GLU 19 (A) | C | TRP 20 (A) | CB | 3.64 | yes |  |  |
| TRP 20 (A) | C | VAL 21 (A) | C | 3.51 | yes |  |  |
| TRP 20 (A) | C | VAL 21 (A) | CB | 3.47 | yes |  |  |
| TRP 20 (A) | C | VAL 21 (A) | CG2 | 3.44 | yes |  |  |
| TRP 20 (A) | CZ2 | ILE 3 (C) | CD1 | 3.87 |  | yes |  |
| TRP 20 (A) | CZ3 | ARG 15 (C) | CB | 3.79 |  | yes |  |
| TRP 20 (A) | CH2 | ARG 15 (C) | CB | 3.74 |  | yes |  |
| VAL 21 (A) | C | LEU 22 (A) | C | 2.94 | yes |  |  |
| VAL 21 (A) | C | LEU 22 (A) | CB | 3.71 | yes |  |  |
| VAL 21 (A) | CG1 | PHE 26 (A) | CE2 | 3.68 | yes |  |  |
| VAL 21 (A) | CG1 | PHE 26 (A) | CZ | 3.87 | yes |  |  |
| LEU 22 (A) | C | LEU 23 (A) | C | 2.98 | yes |  |  |
| LEU 22 (A) | C | LEU 23 (A) | CB | 3.7 | yes |  |  |
| LEU 23 (A) | C | SER 24 (A) | C | 3.03 | yes |  |  |
| LEU 23 (A) | C | SER 24 (A) | CB | 3.72 | yes |  |  |
| LEU 23 (A) | CG | LEU 27 (A) | CD1 | 3.82 | yes |  |  |
| LEU 23 (A) | CD1 | LEU 23 (B) | CD1 | 3.97 |  | yes |  |
| LEU 23 (A) | CD1 | LEU 23 (B) | CD2 | 3.96 |  | yes |  |
| LEU 23 (A) | CD1 | LEU 23 (C) | CD1 | 3.89 |  | yes |  |
| LEU 23 (A) | CD2 | PHE 26 (C) | CB | 3.62 |  | yes |  |
| LEU 23 (A) | CD2 | PHE 26 (C) | CG | 3.59 |  | yes |  |
| LEU 23 (A) | CD2 | PHE 26 (C) | CD2 | 3.6 |  | yes |  |
| SER 24 (A) | C | THR 25 (A) | C | 3.09 | yes |  |  |
| SER 24 (A) | C | THR 25 (A) | CB | 3.72 | yes |  |  |
| THR 25 (A) | C | PHE 26 (A) | C | 3.4 | yes |  |  |
| THR 25 (A) | C | PHE 26 (A) | CB | 3.61 | yes |  |  |
| THR 25 (A) | C | PHE 26 (A) | CG | 3.79 | yes |  |  |
| PHE 26 (A) | C | LEU 27 (A) | C | 3.42 | yes |  |  |
| PHE 26 (A) | C | LEU 27 (A) | CB | 3.57 | yes |  |  |
| PHE 26 (A) | C | LEU 27 (A) | CG | 3.83 | yes |  |  |
| PHE 26 (A) | C | LEU 27 (A) | CD2 | 3.85 | yes |  |  |
| PHE 26 (A) | CB | LEU 23 (B) | CD2 | 3.49 |  | yes |  |
| PHE 26 (A) | CG | LEU 23 (B) | CD2 | 3.79 |  | yes |  |
| PHE 26 (A) | CE1 | ALA 12 (B) | CB | 3.77 |  | yes |  |
| PHE 26 (A) | CZ | ALA 12 (B) | CB | 3.76 |  | yes |  |
| LEU 27 (A) | CD2 | LEU 27 (B) | CD2 | 3.41 |  | yes |  |
| LEU 27 (A) | CD2 | LEU 27 (C) | CD2 | 3.58 |  | yes |  |
| GLY 1 (B) | C | TYR 2 (B) | C | 3.08 | yes |  |  |
| GLY 1 (B) | C | TYR 2 (B) | CB | 3.7 | yes |  |  |
| TYR 2 (B) | C | ILE 3 (B) | C | 3.46 | yes |  |  |
| TYR 2 (B) | C | ILE 3 (B) | CB | 3.64 | yes |  |  |
| TYR 2 (B) | C | ILE 3 (B) | CG1 | 3.76 | yes |  |  |
| TYR 2 (B) | CG | TYR 2 (C) | CB | 3.78 |  | yes |  |
| TYR 2 (B) | CD1 | TYR 2 (C) | CB | 3.63 |  | yes |  |
| TYR 2 (B) | CE1 | TYR 2 (C) | CB | 3.82 |  | yes |  |
| ILE 3 (B) | C | PRO 4 (B) | C | 3.12 | yes |  |  |
| ILE 3 (B) | C | PRO 4 (B) | CB | 3.64 | yes |  |  |
| ILE 3 (B) | C | PRO 4 (B) | CG | 3.57 | yes |  |  |
| ILE 3 (B) | C | PRO 4 (B) | CD | 2.51 | yes |  |  |
| ILE 3 (B) | CG2 | PRO 4 (B) | CD | 3.77 | yes |  |  |
| ILE 3 (B) | CG2 | ARG 15 (B) | CZ | 3.41 | yes |  |  |
| ILE 3 (B) | CG2 | TRP 20 (B) | CZ2 | 3.54 | yes |  |  |
| ILE 3 (B) | CD1 | PRO 4 (C) | C | 3.98 |  | yes |  |
| ILE 3 (B) | CD1 | TRP 20 (C) | CZ2 | 3.3 |  | yes |  |
| ILE 3 (B) | CD1 | TRP 20 (C) | CH2 | 3.93 |  | yes |  |
| PRO 4 (B) | C | GLU 5 (B) | C | 3 | yes |  |  |
| PRO 4 (B) | C | GLU 5 (B) | CB | 3.7 | yes |  |  |
| GLU 5 (B) | C | ALA 6 (B) | C | 3.09 | yes |  |  |
| GLU 5 (B) | C | ALA 6 (B) | CB | 3.69 | yes |  |  |
| GLU 5 (B) | CG | ARG 8 (B) | CZ | 3.71 | yes |  |  |
| ALA 6 (B) | C | PRO 7 (B) | C | 2.89 | yes |  |  |
| ALA 6 (B) | C | PRO 7 (B) | CB | 3.61 | yes |  |  |
| ALA 6 (B) | C | PRO 7 (B) | CG | 3.63 | yes |  |  |
| ALA 6 (B) | C | PRO 7 (B) | CD | 2.54 | yes |  |  |
| ALA 6 (B) | CB | PRO 7 (B) | CD | 3.35 | yes |  |  |
| ALA 6 (B) | CB | TRP 20 (B) | CG | 3.73 | yes |  |  |
| ALA 6 (B) | CB | TRP 20 (B) | CD1 | 3.86 | yes |  |  |
| ALA 6 (B) | CB | TRP 20 (B) | CD2 | 3.59 | yes |  |  |
| ALA 6 (B) | CB | TRP 20 (B) | CE2 | 3.65 | yes |  |  |
| PRO 7 (B) | C | ARG 8 (B) | C | 3.39 | yes |  |  |
| PRO 7 (B) | C | ARG 8 (B) | CB | 3.56 | yes |  |  |
| PRO 7 (B) | C | ARG 8 (B) | CG | 3.79 | yes |  |  |
| PRO 7 (B) | CB | TYR 13 (B) | CE2 | 3.78 | yes |  |  |
| PRO 7 (B) | CB | TYR 13 (B) | CZ | 3.55 | yes |  |  |
| PRO 7 (B) | CG | TYR 13 (B) | CE1 | 3.68 | yes |  |  |
| PRO 7 (B) | CG | TYR 13 (B) | CZ | 3.55 | yes |  |  |
| PRO 7 (B) | CD | TYR 13 (B) | CD1 | 3.96 | yes |  |  |
| PRO 7 (B) | CD | TYR 13 (B) | CD2 | 3.99 | yes |  |  |
| PRO 7 (B) | CD | TYR 13 (B) | CE1 | 3.87 | yes |  |  |
| PRO 7 (B) | CD | TYR 13 (B) | CE2 | 3.9 | yes |  |  |
| PRO 7 (B) | CD | TYR 13 (B) | CZ | 3.84 | yes |  |  |
| PRO 7 (B) | CD | TRP 20 (B) | CB | 3.76 | yes |  |  |
| ARG 8 (B) | C | ASP 9 (B) | C | 3.39 | yes |  |  |
| ARG 8 (B) | C | ASP 9 (B) | CB | 3.57 | yes |  |  |
| ASP 9 (B) | CG | GLN 11 (B) | CG | 3.84 | yes |  |  |
| GLN 11 (B) | C | ALA 12 (B) | C | 3.27 | yes |  |  |
| GLN 11 (B) | C | ALA 12 (B) | CB | 3.66 | yes |  |  |
| GLN 11 (B) | C | TYR 13 (B) | CD2 | 3.8 | yes |  |  |
| GLN 11 (B) | C | TYR 13 (B) | CE2 | 3.68 | yes |  |  |
| GLN 11 (B) | CB | TYR 13 (B) | CE2 | 3.88 | yes |  |  |
| GLN 11 (B) | CB | LEU 22 (B) | CD2 | 3.51 | yes |  |  |
| GLN 11 (B) | CD | LEU 22 (B) | CD2 | 3.49 | yes |  |  |
| ALA 12 (B) | C | TYR 13 (B) | C | 3.58 | yes |  |  |
| ALA 12 (B) | C | TYR 13 (B) | CB | 3.45 | yes |  |  |
| ALA 12 (B) | C | TYR 13 (B) | CG | 3.52 | yes |  |  |
| ALA 12 (B) | C | TYR 13 (B) | CD2 | 3.47 | yes |  |  |
| TYR 13 (B) | C | VAL 14 (B) | C | 3.5 | yes |  |  |
| TYR 13 (B) | C | VAL 14 (B) | CB | 3.53 | yes |  |  |
| TYR 13 (B) | C | VAL 14 (B) | CG1 | 3.54 | yes |  |  |
| TYR 13 (B) | CB | TRP 20 (B) | CE3 | 3.67 | yes |  |  |
| TYR 13 (B) | CD1 | TRP 20 (B) | C | 3.97 | yes |  |  |
| TYR 13 (B) | CD1 | TRP 20 (B) | CB | 3.91 | yes |  |  |
| TYR 13 (B) | CD1 | VAL 21 (B) | C | 3.59 | yes |  |  |
| TYR 13 (B) | CE1 | LEU 22 (B) | CG | 3.82 | yes |  |  |
| TYR 13 (B) | CE1 | LEU 22 (B) | CD2 | 3.46 | yes |  |  |
| TYR 13 (B) | CZ | LEU 22 (B) | CD2 | 3.51 | yes |  |  |
| VAL 14 (B) | C | ARG 15 (B) | C | 3.36 | yes |  |  |
| VAL 14 (B) | C | ARG 15 (B) | CB | 3.56 | yes |  |  |
| VAL 14 (B) | C | TRP 20 (B) | CE3 | 3.75 | yes |  |  |
| VAL 14 (B) | CG1 | LEU 23 (B) | CD1 | 3.95 | yes |  |  |
| VAL 14 (B) | CG1 | VAL 14 (C) | CG1 | 3.84 |  | yes |  |
| VAL 14 (B) | CG2 | PHE 26 (B) | CE2 | 3.78 | yes |  |  |
| VAL 14 (B) | CG2 | ALA 12 (C) | CB | 3.85 |  | yes |  |
| ARG 15 (B) | C | LYS 16 (B) | C | 3.64 | yes |  |  |
| ARG 15 (B) | C | LYS 16 (B) | CB | 3.23 | yes |  |  |
| ARG 15 (B) | CG | ALA 6 (C) | CB | 3.73 |  | yes |  |
| ARG 15 (B) | CZ | GLY 18 (B) | C | 3.48 |  | yes |  |
| ARG 15 (B) | CZ | GLU 19 (B) | C | 3.94 | yes |  |  |
| LYS 16 (B) | CB | VAL 21 (B) | CG2 | 4 | yes |  |  |
| LYS 16 (B) | CG | GLN 11 (C) | C | 3.78 |  | yes |  |
| GLY 18 (B) | C | GLU 19 (B) | C | 3.57 | yes |  |  |
| GLY 18 (B) | C | GLU 19 (B) | CB | 3.38 | yes |  |  |
| GLY 18 (B) | C | GLU 19 (B) | CG | 3.41 | yes |  |  |
| GLY 18 (B) | C | GLU 19 (B) | CD | 3.75 | yes |  |  |
| GLU 19 (B) | C | TRP 20 (B) | C | 3.23 | yes |  |  |
| GLU 19 (B) | C | TRP 20 (B) | CB | 3.6 | yes |  |  |
| GLU 19 (B) | C | TRP 20 (B) | CG | 3.91 | yes |  |  |
| TRP 20 (B) | C | VAL 21 (B) | C | 3.49 | yes |  |  |
| TRP 20 (B) | C | VAL 21 (B) | CB | 3.54 | yes |  |  |
| TRP 20 (B) | C | VAL 21 (B) | CG2 | 3.57 | yes |  |  |
| VAL 21 (B) | C | LEU 22 (B) | C | 2.98 | yes |  |  |
| VAL 21 (B) | C | LEU 22 (B) | CB | 3.69 | yes |  |  |
| VAL 21 (B) | CG1 | PHE 26 (B) | CE2 | 3.62 | yes |  |  |
| LEU 22 (B) | C | LEU 23 (B) | C | 2.97 | yes |  |  |
| LEU 22 (B) | C | LEU 23 (B) | CB | 3.69 | yes |  |  |
| LEU 23 (B) | C | SER 24 (B) | C | 3.02 | yes |  |  |
| LEU 23 (B) | C | SER 24 (B) | CB | 3.72 | yes |  |  |
| LEU 23 (B) | CD1 | LEU 23 (C) | CD1 | 3.84 |  | yes |  |
| LEU 23 (B) | CD1 | LEU 23 (C) | CD2 | 4 |  | yes |  |
| SER 24 (B) | C | THR 25 (B) | C | 3.1 | yes |  |  |
| SER 24 (B) | C | THR 25 (B) | CB | 3.73 | yes |  |  |
| THR 25 (B) | C | PHE 26 (B) | C | 3.41 | yes |  |  |
| THR 25 (B) | C | PHE 26 (B) | CB | 3.63 | yes |  |  |
| THR 25 (B) | C | PHE 26 (B) | CG | 3.89 | yes |  |  |
| PHE 26 (B) | C | LEU 27 (B) | C | 3.16 | yes |  |  |
| PHE 26 (B) | C | LEU 27 (B) | CB | 3.68 | yes |  |  |
| PHE 26 (B) | CB | LEU 23 (C) | CD2 | 3.83 |  | yes |  |
| PHE 26 (B) | CB | LEU 27 (C) | CD1 | 3.77 |  | yes |  |
| PHE 26 (B) | CG | LEU 23 (C) | CD2 | 3.76 |  | yes |  |
| PHE 26 (B) | CD2 | LEU 23 (C) | CD2 | 3.86 |  | yes |  |
| PHE 26 (B) | CZ | ALA 12 (C) | CB | 3.91 |  | yes |  |
| GLY 1 (C) | C | TYR 2 (C) | C | 3.11 | yes |  |  |
| GLY 1 (C) | C | TYR 2 (C) | CB | 3.69 | yes |  |  |
| TYR 2 (C) | C | ILE 3 (C) | C | 3.3 | yes |  |  |
| TYR 2 (C) | C | ILE 3 (C) | CB | 3.64 | yes |  |  |
| TYR 2 (C) | C | ILE 3 (C) | CG2 | 3.85 | yes |  |  |
| ILE 3 (C) | C | PRO 4 (C) | C | 3.16 | yes |  |  |
| ILE 3 (C) | C | PRO 4 (C) | CB | 3.62 | yes |  |  |
| ILE 3 (C) | C | PRO 4 (C) | CG | 3.6 | yes |  |  |
| ILE 3 (C) | C | PRO 4 (C) | CD | 2.53 | yes |  |  |
| ILE 3 (C) | CB | PRO 4 (C) | CD | 3.31 | yes |  |  |
| ILE 3 (C) | CD1 | ARG 15 (C) | CD | 3.83 | yes |  |  |
| ILE 3 (C) | CD1 | ARG 15 (C) | CZ | 3.91 | yes |  |  |
| ILE 3 (C) | CD1 | TRP 20 (C) | CZ2 | 3.55 | yes |  |  |
| PRO 4 (C) | C | GLU 5 (C) | C | 2.97 | yes |  |  |
| PRO 4 (C) | C | GLU 5 (C) | CB | 3.69 | yes |  |  |
| GLU 5 (C) | C | ALA 6 (C) | C | 3.09 | yes |  |  |
| GLU 5 (C) | C | ALA 6 (C) | CB | 3.7 | yes |  |  |
| ALA 6 (C) | C | PRO 7 (C) | C | 2.95 | yes |  |  |
| ALA 6 (C) | C | PRO 7 (C) | CB | 3.63 | yes |  |  |
| ALA 6 (C) | C | PRO 7 (C) | CG | 3.62 | yes |  |  |
| ALA 6 (C) | C | PRO 7 (C) | CD | 2.55 | yes |  |  |
| ALA 6 (C) | CB | PRO 7 (C) | CD | 3.32 | yes |  |  |
| ALA 6 (C) | CB | TRP 20 (C) | CG | 3.82 | yes |  |  |
| ALA 6 (C) | CB | TRP 20 (C) | CD1 | 3.99 | yes |  |  |
| ALA 6 (C) | CB | TRP 20 (C) | CD2 | 3.64 | yes |  |  |
| ALA 6 (C) | CB | TRP 20 (C) | CE2 | 3.72 | yes |  |  |
| PRO 7 (C) | C | ARG 8 (C) | C | 3.42 | yes |  |  |
| PRO 7 (C) | C | ARG 8 (C) | CB | 3.56 | yes |  |  |
| PRO 7 (C) | C | ARG 8 (C) | CG | 3.69 | yes |  |  |
| PRO 7 (C) | CB | TYR 13 (C) | CE2 | 3.69 | yes |  |  |
| PRO 7 (C) | CB | TYR 13 (C) | CZ | 3.63 | yes |  |  |
| PRO 7 (C) | CG | TYR 13 (C) | CE1 | 3.67 | yes |  |  |
| PRO 7 (C) | CG | TYR 13 (C) | CE2 | 3.86 | yes |  |  |
| PRO 7 (C) | CG | TYR 13 (C) | CZ | 3.48 | yes |  |  |
| PRO 7 (C) | CD | TYR 13 (C) | CG | 3.94 | yes |  |  |
| PRO 7 (C) | CD | TYR 13 (C) | CD1 | 3.92 | yes |  |  |
| PRO 7 (C) | CD | TYR 13 (C) | CD2 | 3.91 | yes |  |  |
| PRO 7 (C) | CD | TYR 13 (C) | CE1 | 3.9 | yes |  |  |
| PRO 7 (C) | CD | TYR 13 (C) | CE2 | 3.89 | yes |  |  |
| PRO 7 (C) | CD | TYR 13 (C) | CZ | 3.89 | yes |  |  |
| PRO 7 (C) | CD | TRP 20 (C) | CB | 3.83 | yes |  |  |
| ARG 8 (C) | C | ASP 9 (C) | C | 3.28 | yes |  |  |
| ARG 8 (C) | C | ASP 9 (C) | CB | 3.66 | yes |  |  |
| ASP 9 (C) | CG | GLN 11 (C) | CG | 3.9 | yes |  |  |
| GLN 11 (C) | C | ALA 12 (C) | C | 3.31 | yes |  |  |
| GLN 11 (C) | C | ALA 12 (C) | CB | 3.63 | yes |  |  |
| GLN 11 (C) | C | TYR 13 (C) | CD2 | 3.91 | yes |  |  |
| GLN 11 (C) | C | TYR 13 (C) | CE2 | 3.94 | yes |  |  |
| GLN 11 (C) | CB | TYR 13 (C) | CE2 | 3.97 | yes |  |  |
| GLN 11 (C) | CB | LEU 22 (C) | CD2 | 3.52 | yes |  |  |
| GLN 11 (C) | CD | LEU 22 (C) | CD2 | 3.58 | yes |  |  |
| ALA 12 (C) | C | TYR 13 (C) | C | 3.58 | yes |  |  |
| ALA 12 (C) | C | TYR 13 (C) | CB | 3.46 | yes |  |  |
| ALA 12 (C) | C | TYR 13 (C) | CG | 3.61 | yes |  |  |
| ALA 12 (C) | C | TYR 13 (C) | CD2 | 3.48 | yes |  |  |
| TYR 13 (C) | C | VAL 14 (C) | C | 3.52 | yes |  |  |
| TYR 13 (C) | C | VAL 14 (C) | CB | 3.48 | yes |  |  |
| TYR 13 (C) | C | VAL 14 (C) | CG1 | 3.46 | yes |  |  |
| TYR 13 (C) | CB | TRP 20 (C) | CE3 | 3.79 | yes |  |  |
| TYR 13 (C) | CD1 | TRP 20 (C) | C | 3.86 | yes |  |  |
| TYR 13 (C) | CD1 | TRP 20 (C) | CB | 3.85 | yes |  |  |
| TYR 13 (C) | CD1 | VAL 21 (C) | C | 3.41 | yes |  |  |
| TYR 13 (C) | CE1 | LEU 22 (C) | CG | 3.87 | yes |  |  |
| TYR 13 (C) | CE1 | LEU 22 (C) | CD2 | 3.67 | yes |  |  |
| TYR 13 (C) | CE2 | LEU 22 (C) | CD2 | 3.89 | yes |  |  |
| TYR 13 (C) | CZ | LEU 22 (C) | CD2 | 3.45 | yes |  |  |
| VAL 14 (C) | C | ARG 15 (C) | C | 3.34 | yes |  |  |
| VAL 14 (C) | C | ARG 15 (C) | CB | 3.58 | yes |  |  |
| VAL 14 (C) | C | TRP 20 (C) | CE3 | 3.65 | yes |  |  |
| VAL 14 (C) | C | TRP 20 (C) | CZ3 | 3.98 | yes |  |  |
| VAL 14 (C) | CG1 | LEU 23 (C) | CD1 | 3.91 | yes |  |  |
| VAL 14 (C) | CG2 | VAL 21 (C) | CG2 | 3.65 | yes |  |  |
| VAL 14 (C) | CG2 | PHE 26 (C) | CE2 | 3.87 | yes |  |  |
| ARG 15 (C) | C | LYS 16 (C) | C | 3.66 | yes |  |  |
| ARG 15 (C) | C | LYS 16 (C) | CB | 3.21 | yes |  |  |
| ARG 15 (C) | CD | GLU 19 (C) | C | 3.94 | yes |  |  |
| ARG 15 (C) | CZ | GLY 18 (C) | C | 3.56 | yes |  |  |
| ARG 15 (C) | CZ | GLU 19 (C) | C | 4 | yes |  |  |
| LYS 16 (C) | CB | VAL 21 (C) | CG2 | 3.87 | yes |  |  |
| LYS 16 (C) | CD | VAL 21 (C) | CG2 | 3.96 | yes |  |  |
| LYS 16 (C) | CD | PHE 26 (C) | CZ | 4 | yes |  |  |
| GLY 18 (C) | C | GLU 19 (C) | C | 3.61 | yes |  |  |
| GLY 18 (C) | C | GLU 19 (C) | CB | 3.32 | yes |  |  |
| GLY 18 (C) | C | GLU 19 (C) | CG | 3.32 | yes |  |  |
| GLY 18 (C) | C | GLU 19 (C) | CD | 3.69 | yes |  |  |
| GLU 19 (C) | C | TRP 20 (C) | C | 3.23 | yes |  |  |
| GLU 19 (C) | C | TRP 20 (C) | CB | 3.64 | yes |  |  |
| TRP 20 (C) | C | VAL 21 (C) | C | 3.53 | yes |  |  |
| TRP 20 (C) | C | VAL 21 (C) | CB | 3.44 | yes |  |  |
| TRP 20 (C) | C | VAL 21 (C) | CG1 | 3.41 | yes |  |  |
| VAL 21 (C) | C | LEU 22 (C) | C | 3.03 | yes |  |  |
| VAL 21 (C) | C | LEU 22 (C) | CB | 3.68 | yes |  |  |
| VAL 21 (C) | CG2 | PHE 26 (C) | CE2 | 3.9 | yes |  |  |
| LEU 22 (C) | C | LEU 23 (C) | C | 3 | yes |  |  |
| LEU 22 (C) | C | LEU 23 (C) | CB | 3.71 | yes |  |  |
| LEU 23 (C) | C | SER 24 (C) | C | 3.04 | yes |  |  |
| LEU 23 (C) | C | SER 24 (C) | CB | 3.71 | yes |  |  |
| LEU 23 (C) | CG | LEU 27 (C) | CD1 | 3.58 | yes |  |  |
| LEU 23 (C) | CD2 | LEU 27 (C) | CD1 | 3.78 | yes |  |  |
| SER 24 (C) | C | THR 25 (C) | C | 2.97 | yes |  |  |
| SER 24 (C) | C | THR 25 (C) | CB | 3.73 | yes |  |  |
| THR 25 (C) | C | PHE 26 (C) | C | 3.44 | yes |  |  |
| THR 25 (C) | C | PHE 26 (C) | CB | 3.56 | yes |  |  |
| THR 25 (C) | C | PHE 26 (C) | CG | 3.68 | yes |  |  |
| THR 25 (C) | C | PHE 26 (C) | CD2 | 3.96 | yes |  |  |
| THR 25 (C) | CB | PHE 26 (C) | CD2 | 3.62 | yes |  |  |
| THR 25 (C) | CB | PHE 26 (C) | CE2 | 3.62 | yes |  |  |
| THR 25 (C) | CG2 | PHE 26 (C) | CZ | 3.97 | yes |  |  |
| PHE 26 (C) | C | LEU 27 (C) | C | 3.43 | yes |  |  |
| PHE 26 (C) | C | LEU 27 (C) | CB | 3.55 | yes |  |  |
| PHE 26 (C) | C | LEU 27 (C) | CG | 3.8 | yes |  |  |
| PHE 26 (C) | C | LEU 27 (C) | CD2 | 3.89 | yes |  |  |
|  |  |  |  | **sums** | **311** | **69** | **380** |

**Table S11:** Intercatenane Cα atom distances of the foldon 0 trimer.

| **aa** | **dAB (Å)** | **dBC (Å)** | **dCA (Å)** | **avg. d (Å)** | **std. dev. d** |
| --- | --- | --- | --- | --- | --- |
| G1 | 13.374 | 13.383 | 12.769 | 13.175 | 0.352 |
| Y2 | 7.502 | 7.223 | 7.045 | 7.257 | 0.230 |
| I3 | 7.164 | 7.086 | 6.988 | 7.079 | 0.088 |
| P4 | 9.384 | 9.340 | 9.349 | 9.358 | 0.023 |
| D5 | 10.669 | 10.374 | 10.544 | 10.529 | 0.148 |
| A6 | 13.406 | 13.168 | 13.261 | 13.278 | 0.120 |
| P7 | 19.657 | 19.597 | 19.426 | 19.560 | 0.120 |
| R8 | 22.508 | 22.552 | 22.155 | 22.405 | 0.218 |
| D9 | 25.713 | 25.985 | 25.679 | 25.792 | 0.168 |
| G10 | 23.481 | 23.381 | 23.289 | 23.384 | 0.096 |
| Q11 | 18.684 | 18.668 | 18.767 | 18.706 | 0.053 |
| A12 | 12.270 | 12.229 | 12.152 | 12.217 | 0.060 |
| Y13 | 9.211 | 9.133 | 9.140 | 9.161 | 0.043 |
| V14 | 5.615 | 5.571 | 5.701 | 5.629 | 0.066 |
| R15 | 8.049 | 7.963 | 8.082 | 8.031 | 0.061 |
| K16 | 14.367 | 14.218 | 14.511 | 14.365 | 0.147 |
| D17 | 19.573 | 19.662 | 19.976 | 19.737 | 0.212 |
| G18 | 16.276 | 16.348 | 16.594 | 16.406 | 0.167 |
| E19 | 15.836 | 15.868 | 16.048 | 15.917 | 0.114 |
| W20 | 12.828 | 12.791 | 12.896 | 12.838 | 0.053 |
| V21 | 14.020 | 13.991 | 14.000 | 14.004 | 0.015 |
| L22 | 13.864 | 13.658 | 13.815 | 13.779 | 0.108 |
| L23 | 8.303 | 8.089 | 8.303 | 8.232 | 0.124 |
| S24 | 11.754 | 11.891 | 12.130 | 11.925 | 0.190 |
| T25 | 14.091 | 14.377 | 14.669 | 14.379 | 0.289 |
| F26 | 9.119 | 9.268 | 9.460 | 9.282 | 0.171 |
| L27 | 7.600 | 7.836 | 7.647 | 7.694 | 0.125 |

**Table S12:** Intercatenane Cα atom distances of the foldon 1 trimer.

| **aa** | **dAB (Å)** | **dBC (Å)** | **dCA (Å)** | **avg d (Å)** | **std. dev. d** |
| --- | --- | --- | --- | --- | --- |
| G1 | 13.181 | 12.366 | 11.786 | 12.444 | 0.701 |
| Y2 | 6.195 | 6.245 | 6.282 | 6.241 | 0.044 |
| I3 | 5.551 | 7.142 | 6.274 | 6.322 | 0.797 |
| P4 | 9.833 | 10.477 | 9.198 | 9.836 | 0.640 |
| D5 | 12.288 | 11.805 | 11.566 | 11.886 | 0.368 |
| A6 | 14.010 | 13.497 | 13.432 | 13.646 | 0.317 |
| P7 | 20.369 | 19.726 | 19.684 | 19.926 | 0.384 |
| R8 | 23.728 | 23.030 | 23.463 | 23.407 | 0.352 |
| D9 | 26.255 | 26.290 | 26.112 | 26.219 | 0.094 |
| DAL10 | 24.033 | 24.131 | 23.974 | 24.046 | 0.079 |
| Q11 | 19.297 | 19.326 | 19.213 | 19.279 | 0.059 |
| A12 | 12.814 | 12.806 | 12.710 | 12.777 | 0.058 |
| Y13 | 9.683 | 9.628 | 9.561 | 9.624 | 0.061 |
| V14 | 5.789 | 5.851 | 5.701 | 5.780 | 0.075 |
| R15 | 8.750 | 9.031 | 8.944 | 8.908 | 0.144 |
| K16 | 15.139 | 15.312 | 15.288 | 15.246 | 0.094 |
| DPN17 | 20.407 | 20.761 | 20.627 | 20.598 | 0.179 |
| G18 | 17.286 | 18.018 | 17.712 | 17.672 | 0.368 |
| E19 | 16.605 | 17.156 | 16.655 | 16.805 | 0.305 |
| W20 | 13.414 | 13.792 | 13.282 | 13.496 | 0.265 |
| V21 | 15.179 | 15.219 | 15.142 | 15.180 | 0.039 |
| L22 | 14.709 | 14.611 | 14.479 | 14.600 | 0.115 |
| L23 | 9.099 | 9.006 | 9.006 | 9.037 | 0.054 |
| S24 | 12.634 | 12.861 | 12.672 | 12.722 | 0.122 |
| T25 | 15.593 | 15.570 | 15.314 | 15.492 | 0.155 |
| F26 | 11.150 | 10.695 | 11.040 | 10.962 | 0.237 |
| L27 | 7.509 | 6.925 | 7.961 | 7.465 | 0.519 |

**Table S13:** SASA differences between foldon 0 and foldon 1 trimers.

| **residue** | **resno** | **SASA (Å2)** | |  | **SASA (Å2)** | **SASA foldon 1 (%)** | **%** |
| --- | --- | --- | --- | --- | --- | --- | --- |
|  |  | **foldon 1** | **foldon 0** |  | **(foldon 1 - foldon 0)** | **(% of foldon 0)** | **(foldon 0 vs. 1)** |
| GLY | 1 | 241.68 | 316.64 |  | -74.96 | 76.33 | 23.67 |
| TYR | 2 | 368.26 | 282.59 |  | 85.67 | 130.32 | -30.32 |
| ILE | 3 | 4.40 | 0.01 |  | 4.39 | 44000.00 | -43900.00 |
| PRO | 4 | 194.69 | 183.45 |  | 11.24 | 106.13 | -6.13 |
| GLU | 5 | 154.21 | 145.91 |  | 8.30 | 105.69 | -5.69 |
| ALA | 6 | 19.29 | 1.01 |  | 18.28 | 1909.90 | -1809.90 |
| PRO | 7 | 159.97 | 214.48 |  | -54.51 | 74.59 | 25.41 |
| ARG | 8 | 500.70 | 485.00 |  | 15.70 | 103.24 | -3.24 |
| ASP | 9 | 257.67 | 265.70 |  | -8.03 | 96.98 | 3.02 |
| DAL/GLY | 10 | 130.15 | 95.97 |  | 34.18 | 135.62 | -35.62 |
| GLN | 11 | 255.07 | 230.82 |  | 24.25 | 110.51 | -10.51 |
| ALA | 12 | 32.35 | 2.48 |  | 29.87 | 1304.44 | -1204.44 |
| TYR | 13 | 48.37 | 52.84 |  | -4.47 | 91.54 | 8.46 |
| VAL | 14 | 4.03 | 0.09 |  | 3.94 | 4477.78 | -4377.78 |
| ARG | 15 | 27.93 | 1.33 |  | 26.60 | 2100.00 | -2000.00 |
| LYS | 16 | 206.18 | 167.22 |  | 38.96 | 123.30 | -23.30 |
| DPN/ASP | 17 | 330.73 | 143.32 |  | 187.41 | 230.76 | -130.76 |
| GLY | 18 | 71.45 | 35.51 |  | 35.94 | 201.21 | -101.21 |
| GLU | 19 | 338.27 | 366.87 |  | -28.60 | 92.20 | 7.80 |
| TRP | 20 | 119.05 | 82.81 |  | 36.24 | 143.76 | -43.76 |
| VAL | 21 | 114.10 | 104.02 |  | 10.08 | 109.69 | -9.69 |
| LEU | 22 | 160.90 | 119.43 |  | 41.47 | 134.72 | -34.72 |
| LEU | 23 | 10.19 | 0.09 |  | 10.10 | 11322.22 | -11222.22 |
| SER | 24 | 218.96 | 179.13 |  | 39.83 | 122.24 | -22.24 |
| THR | 25 | 290.57 | 350.75 |  | -60.18 | 82.84 | 17.16 |
| PHE | 26 | 206.93 | 98.50 |  | 108.43 | 210.08 | -110.08 |
| LEU | 27 | 358.33 | 379.25 |  | -20.92 | 94.48 | 5.52 |
|  | **sums** | **4824.43** | **4305.22** |  |  |  |  |

**Table S14:** Hydrogen bonds in the foldon 0 trimer.

| chain1 | residue1 | res_id1 | atom1 | chain2 | residue2 | res_id2 | atom2 | Distance [Å] | intracatenane | intercatenane | total |
| --- | --- | --- | --- | --- | --- | --- | --- | --- | --- | --- | --- |
| A | GLY | 1 | N | A | TYR | 2 | N | 2.92 | yes |  |  |
| A | GLY | 1 | O | A | TYR | 2 | N | 2.25 | yes |  |  |
| A | GLY | 1 | O | C | GLU | 5 | N | 2.45 |  | yes |  |
| A | TYR | 2 | O | A | ILE | 3 | N | 2.26 | yes |  |  |
| A | TYR | 2 | O | B | TYR | 2 | OH | 3 |  | yes |  |
| A | TYR | 2 | OH | C | TYR | 2 | O | 3.49 |  | yes |  |
| A | ILE | 3 | N | C | GLU | 5 | N | 3.45 |  | yes |  |
| A | ILE | 3 | O | A | PRO | 4 | N | 2.25 | yes |  |  |
| A | PRO | 4 | O | A | GLU | 5 | N | 2.25 | yes |  |  |
| A | PRO | 4 | O | A | GLU | 5 | O | 3.39 | yes |  |  |
| A | PRO | 4 | O | A | TRP | 20 | NE1 | 2.39 | yes |  |  |
| A | GLU | 5 | N | B | GLY | 1 | O | 2.51 |  | yes |  |
| A | GLU | 5 | O | A | ALA | 6 | N | 2.27 | yes |  |  |
| A | GLU | 5 | OE2 | B | ARG | 15 | NE | 2.85 |  | yes |  |
| A | GLU | 5 | OE2 | B | ARG | 15 | NH2 | 2.29 |  | yes |  |
| A | ALA | 6 | N | A | TRP | 20 | NE1 | 3.13 | yes |  |  |
| A | ALA | 6 | N | B | ARG | 15 | NH2 | 3.15 |  | yes |  |
| A | ALA | 6 | O | A | PRO | 7 | N | 2.25 | yes |  |  |
| A | ALA | 6 | O | A | PRO | 7 | O | 3.06 | yes |  |  |
| A | ALA | 6 | O | A | ARG | 8 | NE | 2.91 | yes |  |  |
| A | ALA | 6 | O | A | ARG | 8 | NH2 | 3.42 | yes |  |  |
| A | ALA | 6 | O | B | ARG | 15 | NH2 | 2.47 |  | yes |  |
| A | PRO | 7 | O | A | ARG | 8 | N | 2.26 | yes |  |  |
| A | ARG | 8 | N | A | ASP | 9 | N | 2.9 | yes |  |  |
| A | ARG | 8 | O | A | ASP | 9 | N | 2.24 | yes |  |  |
| A | ASP | 9 | N | A | GLY | 10 | N | 2.67 | yes |  |  |
| A | ASP | 9 | O | A | GLY | 10 | N | 2.25 | yes |  |  |
| A | ASP | 9 | O | A | GLN | 11 | N | 3.48 | yes |  |  |
| A | ASP | 9 | OD1 | A | GLN | 11 | N | 3.36 | yes |  |  |
| A | ASP | 9 | OD2 | A | GLN | 11 | OE1 | 3.09 | yes |  |  |
| A | GLY | 10 | N | A | GLN | 11 | N | 2.71 | yes |  |  |
| A | GLY | 10 | O | A | GLN | 11 | N | 2.25 | yes |  |  |
| A | GLN | 11 | O | A | ALA | 12 | N | 2.24 | yes |  |  |
| A | ALA | 12 | O | A | TYR | 13 | N | 2.25 | yes |  |  |
| A | ALA | 12 | O | A | LEU | 23 | N | 2.69 | yes |  |  |
| A | TYR | 13 | N | B | ARG | 15 | O | 2.44 |  | yes |  |
| A | TYR | 13 | O | A | VAL | 14 | N | 2.24 | yes |  |  |
| A | TYR | 13 | O | B | ARG | 15 | N | 2.67 |  | yes |  |
| A | VAL | 14 | N | A | VAL | 21 | O | 2.63 | yes |  |  |
| A | VAL | 14 | O | A | ARG | 15 | N | 2.23 | yes |  |  |
| A | VAL | 14 | O | A | GLU | 19 | O | 3.25 | yes |  |  |
| A | VAL | 14 | O | A | VAL | 21 | N | 2.93 | yes |  |  |
| A | ARG | 15 | N | A | LYS | 16 | N | 3.3 | yes |  |  |
| A | ARG | 15 | N | C | TYR | 13 | O | 2.71 |  | yes |  |
| A | ARG | 15 | O | A | LYS | 16 | N | 2.27 | yes |  |  |
| A | ARG | 15 | O | C | GLN | 11 | O | 3.33 |  | yes |  |
| A | ARG | 15 | O | C | TYR | 13 | N | 2.54 |  | yes |  |
| A | ARG | 15 | NE | A | GLU | 19 | N | 3.45 | yes |  |  |
| A | ARG | 15 | NE | C | GLU | 5 | OE2 | 2.97 |  | yes |  |
| A | ARG | 15 | NH1 | A | GLY | 18 | O | 3.26 | yes |  |  |
| A | ARG | 15 | NH1 | A | TRP | 20 | NE1 | 3.24 | yes |  |  |
| A | ARG | 15 | NH2 | A | GLY | 18 | O | 2.57 | yes |  |  |
| A | ARG | 15 | NH2 | C | GLU | 5 | OE2 | 2.26 |  | yes |  |
| A | LYS | 16 | N | A | GLU | 19 | O | 3.16 | yes |  |  |
| A | LYS | 16 | O | A | ASP | 17 | N | 2.24 | yes |  |  |
| A | LYS | 16 | O | A | ASP | 17 | O | 3.3 | yes |  |  |
| A | LYS | 16 | O | A | ASP | 17 | OD1 | 2.32 | yes |  |  |
| A | LYS | 16 | O | A | GLY | 18 | N | 3.04 | yes |  |  |
| A | LYS | 16 | O | A | GLU | 19 | N | 2.78 | yes |  |  |
| A | LYS | 16 | O | A | GLU | 19 | O | 3.03 | yes |  |  |
| A | ASP | 17 | N | A | GLY | 18 | N | 2.86 | yes |  |  |
| A | ASP | 17 | O | A | GLY | 18 | N | 2.25 | yes |  |  |
| A | ASP | 17 | O | A | GLU | 19 | N | 3.05 | yes |  |  |
| A | GLY | 18 | N | A | GLU | 19 | N | 2.77 | yes |  |  |
| A | GLY | 18 | O | A | GLU | 19 | N | 2.24 | yes |  |  |
| A | GLU | 19 | O | A | TRP | 20 | N | 2.25 | yes |  |  |
| A | TRP | 20 | N | A | VAL | 21 | N | 3.35 | yes |  |  |
| A | TRP | 20 | O | A | VAL | 21 | N | 2.25 | yes |  |  |
| A | VAL | 21 | N | A | LEU | 22 | N | 3.47 | yes |  |  |
| A | VAL | 21 | O | A | LEU | 22 | N | 2.23 | yes |  |  |
| A | VAL | 21 | O | A | LEU | 22 | O | 3.37 | yes |  |  |
| A | VAL | 21 | O | A | LEU | 23 | N | 3.05 | yes |  |  |
| A | LEU | 22 | N | A | LEU | 23 | N | 3.41 | yes |  |  |
| A | LEU | 22 | O | A | LEU | 23 | N | 2.24 | yes |  |  |
| A | LEU | 22 | O | A | LEU | 23 | O | 3.32 | yes |  |  |
| A | LEU | 22 | O | A | SER | 24 | N | 3.39 | yes |  |  |
| A | LEU | 22 | O | A | THR | 25 | N | 2.97 | yes |  |  |
| A | LEU | 22 | O | A | THR | 25 | OG1 | 3.49 | yes |  |  |
| A | LEU | 23 | N | A | SER | 24 | N | 2.78 | yes |  |  |
| A | LEU | 23 | O | A | SER | 24 | N | 2.25 | yes |  |  |
| A | LEU | 23 | O | A | THR | 25 | N | 2.82 | yes |  |  |
| A | LEU | 23 | O | A | PHE | 26 | N | 2.5 | yes |  |  |
| A | LEU | 23 | O | A | LEU | 27 | N | 3.41 | yes |  |  |
| A | SER | 24 | N | A | THR | 25 | N | 2.71 | yes |  |  |
| A | SER | 24 | O | A | THR | 25 | N | 2.25 | yes |  |  |
| A | SER | 24 | O | A | PHE | 26 | N | 3.13 | yes |  |  |
| A | SER | 24 | O | A | LEU | 27 | N | 2.9 | yes |  |  |
| A | SER | 24 | O | A | LEU | 27 | OXT | 2.94 | yes |  |  |
| A | SER | 24 | OG | A | THR | 25 | N | 3.18 | yes |  |  |
| A | THR | 25 | N | A | PHE | 26 | N | 2.63 | yes |  |  |
| A | THR | 25 | O | A | PHE | 26 | N | 2.26 | yes |  |  |
| A | PHE | 26 | N | A | LEU | 27 | N | 2.64 | yes |  |  |
| A | PHE | 26 | O | A | LEU | 27 | N | 2.22 | yes |  |  |
| B | GLY | 1 | O | B | TYR | 2 | N | 2.25 | yes |  |  |
| B | TYR | 2 | O | B | ILE | 3 | N | 2.25 | yes |  |  |
| B | ILE | 3 | O | B | PRO | 4 | N | 2.25 | yes |  |  |
| B | PRO | 4 | O | B | GLU | 5 | N | 2.25 | yes |  |  |
| B | PRO | 4 | O | B | GLU | 5 | O | 3.18 | yes |  |  |
| B | PRO | 4 | O | B | TRP | 20 | NE1 | 2.64 | yes |  |  |
| B | GLU | 5 | N | C | GLY | 1 | O | 2.56 |  | yes |  |
| B | GLU | 5 | N | C | ILE | 3 | N | 3.46 |  | yes |  |
| B | GLU | 5 | O | B | ALA | 6 | N | 2.26 | yes |  |  |
| B | GLU | 5 | OE1 | B | ARG | 8 | NE | 3.39 | yes |  |  |
| B | GLU | 5 | OE1 | B | ARG | 8 | NH2 | 2.64 | yes |  |  |
| B | GLU | 5 | OE2 | B | ARG | 8 | NE | 3.42 | yes |  |  |
| B | GLU | 5 | OE2 | C | ARG | 15 | NE | 2.96 |  | yes |  |
| B | GLU | 5 | OE2 | C | ARG | 15 | NH2 | 2.28 |  | yes |  |
| B | ALA | 6 | N | B | TRP | 20 | NE1 | 3.21 | yes |  |  |
| B | ALA | 6 | O | B | PRO | 7 | N | 2.26 | yes |  |  |
| B | ALA | 6 | O | B | PRO | 7 | O | 2.87 | yes |  |  |
| B | PRO | 7 | O | B | ARG | 8 | N | 2.26 | yes |  |  |
| B | ARG | 8 | N | B | ASP | 9 | N | 2.97 | yes |  |  |
| B | ARG | 8 | O | B | ASP | 9 | N | 2.24 | yes |  |  |
| B | ARG | 8 | O | C | ASP | 17 | OD1 | 3.37 |  | yes |  |
| B | ARG | 8 | NE | C | GLY | 18 | N | 3.39 |  | yes |  |
| B | ASP | 9 | N | B | GLY | 10 | N | 2.67 | yes |  |  |
| B | ASP | 9 | N | C | ASP | 17 | OD1 | 3.36 |  | yes |  |
| B | ASP | 9 | O | B | GLY | 10 | N | 2.25 | yes |  |  |
| B | ASP | 9 | O | B | GLN | 11 | N | 3.34 | yes |  |  |
| B | ASP | 9 | OD1 | B | GLN | 11 | N | 3.42 | yes |  |  |
| B | GLY | 10 | N | B | GLN | 11 | N | 2.66 | yes |  |  |
| B | GLY | 10 | N | C | ASP | 17 | OD1 | 2.58 |  | yes |  |
| B | GLY | 10 | O | B | GLN | 11 | N | 2.25 | yes |  |  |
| B | GLN | 11 | O | B | ALA | 12 | N | 2.24 | yes |  |  |
| B | GLN | 11 | OE1 | B | SER | 24 | OG | 3.18 | yes |  |  |
| B | ALA | 12 | N | B | TYR | 13 | N | 3.49 | yes |  |  |
| B | ALA | 12 | O | B | TYR | 13 | N | 2.24 | yes |  |  |
| B | ALA | 12 | O | B | LEU | 23 | N | 2.64 | yes |  |  |
| B | TYR | 13 | N | C | ARG | 15 | O | 2.53 | yes |  |  |
| B | TYR | 13 | O | B | VAL | 14 | N | 2.23 | yes |  |  |
| B | TYR | 13 | O | C | ARG | 15 | N | 2.78 |  | yes |  |
| B | VAL | 14 | N | B | VAL | 21 | O | 2.48 | yes |  |  |
| B | VAL | 14 | O | B | ARG | 15 | N | 2.23 | yes |  |  |
| B | VAL | 14 | O | B | GLU | 19 | O | 3.23 | yes |  |  |
| B | VAL | 14 | O | B | VAL | 21 | N | 2.91 | yes |  |  |
| B | ARG | 15 | N | B | LYS | 16 | N | 3.27 | yes |  |  |
| B | ARG | 15 | O | B | LYS | 16 | N | 2.27 | yes |  |  |
| B | ARG | 15 | NH1 | B | LYS | 16 | N | 2.75 | yes |  |  |
| B | ARG | 15 | NH1 | B | LYS | 16 | O | 3.41 | yes |  |  |
| B | ARG | 15 | NH1 | B | ASP | 17 | N | 3.05 | yes |  |  |
| B | ARG | 15 | NH1 | B | GLY | 18 | N | 2.86 | yes |  |  |
| B | ARG | 15 | NH2 | B | GLY | 18 | N | 3.2 | yes |  |  |
| B | LYS | 16 | N | B | GLU | 19 | O | 3.04 | yes |  |  |
| B | LYS | 16 | O | B | ASP | 17 | N | 2.24 | yes |  |  |
| B | LYS | 16 | O | B | ASP | 17 | O | 3.27 | yes |  |  |
| B | LYS | 16 | O | B | ASP | 17 | OD1 | 2.19 | yes |  |  |
| B | LYS | 16 | O | B | GLY | 18 | N | 3.12 | yes |  |  |
| B | LYS | 16 | O | B | GLU | 19 | N | 2.79 | yes |  |  |
| B | LYS | 16 | O | B | GLU | 19 | O | 3.05 | yes |  |  |
| B | ASP | 17 | N | B | GLY | 18 | N | 2.86 | yes |  |  |
| B | ASP | 17 | O | B | GLY | 18 | N | 2.25 | yes |  |  |
| B | ASP | 17 | O | B | GLU | 19 | N | 3.07 | yes |  |  |
| B | GLY | 18 | N | B | GLU | 19 | N | 2.76 | yes |  |  |
| B | GLY | 18 | O | B | GLU | 19 | N | 2.25 | yes |  |  |
| B | GLU | 19 | O | B | TRP | 20 | N | 2.25 | yes |  |  |
| B | TRP | 20 | N | B | VAL | 21 | N | 3.37 | yes |  |  |
| B | TRP | 20 | O | B | VAL | 21 | N | 2.25 | yes |  |  |
| B | VAL | 21 | N | B | LEU | 22 | N | 3.46 | yes |  |  |
| B | VAL | 21 | O | B | LEU | 22 | N | 2.23 | yes |  |  |
| B | VAL | 21 | O | B | LEU | 22 | O | 3.38 | yes |  |  |
| B | VAL | 21 | O | B | LEU | 23 | N | 3.16 | yes |  |  |
| B | LEU | 22 | N | B | LEU | 23 | N | 3.45 | yes |  |  |
| B | LEU | 22 | O | B | LEU | 23 | N | 2.25 | yes |  |  |
| B | LEU | 22 | O | B | LEU | 23 | O | 3.44 | yes |  |  |
| B | LEU | 22 | O | B | SER | 24 | N | 3.11 | yes |  |  |
| B | LEU | 22 | O | B | THR | 25 | N | 2.67 | yes |  |  |
| B | LEU | 22 | O | B | THR | 25 | OG1 | 3.38 | yes |  |  |
| B | LEU | 23 | N | B | SER | 24 | N | 2.66 | yes |  |  |
| B | LEU | 23 | O | B | SER | 24 | N | 2.24 | yes |  |  |
| B | LEU | 23 | O | B | THR | 25 | N | 3.06 | yes |  |  |
| B | LEU | 23 | O | B | PHE | 26 | N | 2.73 | yes |  |  |
| B | LEU | 23 | O | B | LEU | 27 | N | 3.36 | yes |  |  |
| B | SER | 24 | N | B | THR | 25 | N | 2.68 | yes |  |  |
| B | SER | 24 | O | B | THR | 25 | N | 2.25 | yes |  |  |
| B | SER | 24 | O | B | PHE | 26 | N | 3.21 | yes |  |  |
| B | SER | 24 | O | B | LEU | 27 | N | 2.87 | yes |  |  |
| B | SER | 24 | O | B | LEU | 27 | OXT | 2.72 | yes |  |  |
| B | THR | 25 | N | B | PHE | 26 | N | 2.61 | yes |  |  |
| B | THR | 25 | O | B | PHE | 26 | N | 2.26 | yes |  |  |
| B | PHE | 26 | N | B | LEU | 27 | N | 2.57 | yes |  |  |
| B | PHE | 26 | O | B | LEU | 27 | N | 2.22 | yes |  |  |
| C | GLY | 1 | N | C | TYR | 2 | N | 2.8 | yes |  |  |
| C | GLY | 1 | O | C | TYR | 2 | N | 2.25 | yes |  |  |
| C | TYR | 2 | O | C | ILE | 3 | N | 2.26 | yes |  |  |
| C | ILE | 3 | O | C | PRO | 4 | N | 2.25 | yes |  |  |
| C | PRO | 4 | O | C | GLU | 5 | N | 2.25 | yes |  |  |
| C | PRO | 4 | O | C | GLU | 5 | O | 3.34 | yes |  |  |
| C | PRO | 4 | O | C | TRP | 20 | NE1 | 2.42 | yes |  |  |
| C | GLU | 5 | O | C | ALA | 6 | N | 2.26 | yes |  |  |
| C | ALA | 6 | N | C | TRP | 20 | NE1 | 3.41 | yes |  |  |
| C | ALA | 6 | O | C | PRO | 7 | N | 2.26 | yes |  |  |
| C | ALA | 6 | O | C | PRO | 7 | O | 3.18 | yes |  |  |
| C | ALA | 6 | O | C | ARG | 8 | NH1 | 3.23 | yes |  |  |
| C | PRO | 7 | O | C | ARG | 8 | N | 2.25 | yes |  |  |
| C | ARG | 8 | N | C | ASP | 9 | N | 2.84 | yes |  |  |
| C | ARG | 8 | O | C | ASP | 9 | N | 2.24 | yes |  |  |
| C | ASP | 9 | N | C | GLY | 10 | N | 2.68 | yes |  |  |
| C | ASP | 9 | O | C | GLY | 10 | N | 2.25 | yes |  |  |
| C | ASP | 9 | O | C | GLN | 11 | N | 3.48 | yes |  |  |
| C | ASP | 9 | OD2 | C | GLN | 11 | NE2 | 3.05 | yes |  |  |
| C | GLY | 10 | N | C | GLN | 11 | N | 2.72 | yes |  |  |
| C | GLY | 10 | O | C | GLN | 11 | N | 2.24 | yes |  |  |
| C | GLN | 11 | O | C | ALA | 12 | N | 2.25 | yes |  |  |
| C | GLN | 11 | NE2 | C | TYR | 13 | OH | 3.48 | yes |  |  |
| C | ALA | 12 | O | C | TYR | 13 | N | 2.25 | yes |  |  |
| C | ALA | 12 | O | C | LEU | 23 | N | 2.74 | yes |  |  |
| C | TYR | 13 | O | C | VAL | 14 | N | 2.24 | yes |  |  |
| C | VAL | 14 | N | C | ARG | 15 | N | 3.48 | yes |  |  |
| C | VAL | 14 | N | C | VAL | 21 | O | 2.5 | yes |  |  |
| C | VAL | 14 | O | C | ARG | 15 | N | 2.23 | yes |  |  |
| C | VAL | 14 | O | C | GLU | 19 | O | 3.18 | yes |  |  |
| C | VAL | 14 | O | C | VAL | 21 | N | 2.82 | yes |  |  |
| C | ARG | 15 | N | C | LYS | 16 | N | 3.36 | yes |  |  |
| C | ARG | 15 | O | C | LYS | 16 | N | 2.26 | yes |  |  |
| C | ARG | 15 | NE | C | GLU | 19 | N | 3.45 | yes |  |  |
| C | ARG | 15 | NH1 | C | GLY | 18 | O | 3.23 | yes |  |  |
| C | ARG | 15 | NH1 | C | TRP | 20 | NE1 | 2.99 | yes |  |  |
| C | ARG | 15 | NH2 | C | GLY | 18 | O | 2.6 | yes |  |  |
| C | LYS | 16 | N | C | ASP | 17 | N | 3.47 | yes |  |  |
| C | LYS | 16 | N | C | GLU | 19 | O | 3.02 | yes |  |  |
| C | LYS | 16 | O | C | ASP | 17 | N | 2.24 | yes |  |  |
| C | LYS | 16 | O | C | ASP | 17 | O | 3.35 | yes |  |  |
| C | LYS | 16 | O | C | GLY | 18 | N | 3.34 | yes |  |  |
| C | LYS | 16 | O | C | GLU | 19 | N | 3.05 | yes |  |  |
| C | LYS | 16 | O | C | GLU | 19 | O | 3.22 | yes |  |  |
| C | ASP | 17 | N | C | GLY | 18 | N | 2.81 | yes |  |  |
| C | ASP | 17 | O | C | GLY | 18 | N | 2.24 | yes |  |  |
| C | ASP | 17 | O | C | GLU | 19 | N | 3.03 | yes |  |  |
| C | GLY | 18 | N | C | GLU | 19 | N | 2.76 | yes |  |  |
| C | GLY | 18 | O | C | GLU | 19 | N | 2.25 | yes |  |  |
| C | GLU | 19 | O | C | TRP | 20 | N | 2.25 | yes |  |  |
| C | TRP | 20 | N | C | VAL | 21 | N | 3.37 | yes |  |  |
| C | TRP | 20 | O | C | VAL | 21 | N | 2.25 | yes |  |  |
| C | VAL | 21 | N | C | LEU | 22 | N | 3.48 | yes |  |  |
| C | VAL | 21 | O | C | LEU | 22 | N | 2.23 | yes |  |  |
| C | VAL | 21 | O | C | LEU | 22 | O | 3.41 | yes |  |  |
| C | VAL | 21 | O | C | LEU | 23 | N | 3.21 | yes |  |  |
| C | LEU | 22 | N | C | LEU | 23 | N | 3.45 | yes |  |  |
| C | LEU | 22 | O | C | LEU | 23 | N | 2.25 | yes |  |  |
| C | LEU | 22 | O | C | SER | 24 | N | 3.26 | yes |  |  |
| C | LEU | 22 | O | C | THR | 25 | N | 2.96 | yes |  |  |
| C | LEU | 22 | O | C | THR | 25 | OG1 | 3.38 | yes |  |  |
| C | LEU | 23 | N | C | SER | 24 | N | 2.78 | yes |  |  |
| C | LEU | 23 | O | C | SER | 24 | N | 2.24 | yes |  |  |
| C | LEU | 23 | O | C | THR | 25 | N | 3.08 | yes |  |  |
| C | LEU | 23 | O | C | PHE | 26 | N | 2.75 | yes |  |  |
| C | LEU | 23 | O | C | LEU | 27 | N | 3.46 | yes |  |  |
| C | SER | 24 | N | C | THR | 25 | N | 2.69 | yes |  |  |
| C | SER | 24 | O | C | THR | 25 | N | 2.25 | yes |  |  |
| C | SER | 24 | O | C | PHE | 26 | N | 3.08 | yes |  |  |
| C | SER | 24 | O | C | LEU | 27 | N | 2.86 | yes |  |  |
| C | SER | 24 | O | C | LEU | 27 | OXT | 3.48 | yes |  |  |
| C | SER | 24 | OG | C | THR | 25 | N | 3.27 | yes |  |  |
| C | THR | 25 | N | C | PHE | 26 | N | 2.59 | yes |  |  |
| C | THR | 25 | O | C | PHE | 26 | N | 2.26 | yes |  |  |
| C | PHE | 26 | N | C | LEU | 27 | N | 2.64 | yes |  |  |
| C | PHE | 26 | O | C | LEU | 27 | N | 2.23 | yes |  |  |
|  |  |  |  |  |  |  |  | **sums** | **232** | **25** | **257** |

**Table S15:** Hydrogen bonds in the foldon 1 trimer.

| Residue 1 | Atom 1 | Residue 2 | Atom 2 | Distance [Å] | intracatenane | intercatenane | total |
| --- | --- | --- | --- | --- | --- | --- | --- |
| GLY 1 (A) | O | TYR 2 (A) | N | 2.25 | yes |  |  |
| GLY 1 (A) | O | TYR 2 (A) | O | 3.4 | yes |  |  |
| GLY 1 (A) | O | GLU 5 (B) | N | 3.16 |  | yes |  |
| TYR 2 (A) | O | ILE 3 (A) | N | 2.25 | yes |  |  |
| ILE 3 (A) | N | ILE 3 (B) | O | 2.92 |  | yes |  |
| ILE 3 (A) | O | PRO 4 (A) | N | 2.25 | yes |  |  |
| ILE 3 (A) | O | ILE 3 (C) | N | 3.09 |  | yes |  |
| PRO 4 (A) | O | GLU 5 (A) | N | 2.25 | yes |  |  |
| PRO 4 (A) | O | GLU 5 (A) | O | 3.39 | yes |  |  |
| PRO 4 (A) | O | TRP 20 (A) | NE1 | 2.81 | yes |  |  |
| GLU 5 (A) | N | GLY 1 (C) | O | 3.06 |  | yes |  |
| GLU 5 (A) | O | ALA 6 (A) | N | 2.26 | yes |  |  |
| GLU 5 (A) | O | TRP 20 (A) | NE1 | 3.43 | yes |  |  |
| GLU 5 (A) | OE1 | ARG 15 (C) | NH2 | 2.82 |  | yes |  |
| GLU 5 (A) | OE2 | ALA 6 (A) | N | 2.87 | yes |  |  |
| GLU 5 (A) | OE2 | ARG 15 (C) | NE | 2.87 |  | yes |  |
| ALA 6 (A) | N | TRP 20 (A) | NE1 | 3.43 | yes |  |  |
| ALA 6 (A) | O | PRO 7 (A) | N | 2.24 | yes |  |  |
| ALA 6 (A) | O | PRO 7 (A) | O | 3 | yes |  |  |
| PRO 7 (A) | O | ARG 8 (A) | N | 2.28 | yes |  |  |
| PRO 7 (A) | O | ASP 9 (A) | N | 3.5 | yes |  |  |
| ARG 8 (A) | N | ASP 9 (A) | N | 2.72 | yes |  |  |
| ARG 8 (A) | O | ASP 9 (A) | N | 2.24 | yes |  |  |
| ASP 9 (A) | OD1 | GLN 11 (A) | N | 2.89 | yes |  |  |
| ASP 9 (A) | OD2 | TYR 13 (A) | OH | 2.43 | yes |  |  |
| GLN 11 (A) | O | ALA 12 (A) | N | 2.26 | yes |  |  |
| ALA 12 (A) | O | TYR 13 (A) | N | 2.28 | yes |  |  |
| ALA 12 (A) | O | LEU 23 (A) | N | 2.9 | yes |  |  |
| TYR 13 (A) | N | ARG 15 (C) | O | 2.83 |  | yes |  |
| TYR 13 (A) | O | VAL 14 (A) | N | 2.28 | yes |  |  |
| TYR 13 (A) | O | ARG 15 (C) | N | 3.07 |  | yes |  |
| VAL 14 (A) | N | VAL 21 (A) | O | 2.89 | yes |  |  |
| VAL 14 (A) | O | ARG 15 (A) | N | 2.25 | yes |  |  |
| VAL 14 (A) | O | VAL 21 (A) | N | 2.91 | yes |  |  |
| VAL 14 (A) | O | VAL 21 (A) | O | 3.41 | yes |  |  |
| ARG 15 (A) | N | LYS 16 (A) | N | 3.49 | yes |  |  |
| ARG 15 (A) | N | TYR 13 (B) | O | 3.06 |  | yes |  |
| ARG 15 (A) | O | LYS 16 (A) | N | 2.25 | yes |  |  |
| ARG 15 (A) | O | TYR 13 (B) | N | 2.85 |  | yes |  |
| ARG 15 (A) | NE | GLU 5 (B) | OE2 | 2.89 |  | yes |  |
| ARG 15 (A) | NH1 | TRP 20 (A) | NE1 | 3.41 | yes |  |  |
| ARG 15 (A) | NH2 | GLY 18 (A) | O | 3.21 | yes |  |  |
| ARG 15 (A) | NH2 | GLU 5 (B) | OE1 | 2.78 |  | yes |  |
| LYS 16 (A) | N | GLU 19 (A) | O | 2.91 | yes |  |  |
| LYS 16 (A) | O | GLY 18 (A) | N | 3.16 | yes |  |  |
| LYS 16 (A) | O | GLU 19 (A) | N | 3 | yes |  |  |
| LYS 16 (A) | O | GLU 19 (A) | O | 3.2 | yes |  |  |
| GLY 18 (A) | N | GLU 19 (A) | N | 2.76 | yes |  |  |
| GLY 18 (A) | O | GLU 19 (A) | N | 2.25 | yes |  |  |
| GLY 18 (A) | O | GLU 19 (A) | OE2 | 3.38 | yes |  |  |
| GLU 19 (A) | O | TRP 20 (A) | N | 2.26 | yes |  |  |
| TRP 20 (A) | N | VAL 21 (A) | N | 3.47 | yes |  |  |
| TRP 20 (A) | O | VAL 21 (A) | N | 2.26 | yes |  |  |
| VAL 21 (A) | O | LEU 22 (A) | N | 2.25 | yes |  |  |
| VAL 21 (A) | O | LEU 22 (A) | O | 3.36 | yes |  |  |
| VAL 21 (A) | O | LEU 23 (A) | N | 3.19 | yes |  |  |
| LEU 22 (A) | N | LEU 23 (A) | N | 3.49 | yes |  |  |
| LEU 22 (A) | O | LEU 23 (A) | N | 2.25 | yes |  |  |
| LEU 22 (A) | O | LEU 23 (A) | O | 3.43 | yes |  |  |
| LEU 22 (A) | O | SER 24 (A) | N | 3.23 | yes |  |  |
| LEU 22 (A) | O | THR 25 (A) | N | 3.18 | yes |  |  |
| LEU 22 (A) | O | THR 25 (A) | OG1 | 2.92 | yes |  |  |
| LEU 23 (A) | N | SER 24 (A) | N | 2.82 | yes |  |  |
| LEU 23 (A) | O | SER 24 (A) | N | 2.25 | yes |  |  |
| LEU 23 (A) | O | THR 25 (A) | N | 3.02 | yes |  |  |
| LEU 23 (A) | O | PHE 26 (A) | N | 3.01 | yes |  |  |
| SER 24 (A) | N | THR 25 (A) | N | 2.77 | yes |  |  |
| SER 24 (A) | O | THR 25 (A) | N | 2.25 | yes |  |  |
| SER 24 (A) | O | PHE 26 (A) | N | 3.16 | yes |  |  |
| SER 24 (A) | O | LEU 27 (A) | N | 3.23 | yes |  |  |
| SER 24 (A) | OG | THR 25 (A) | N | 3.26 | yes |  |  |
| THR 25 (A) | N | PHE 26 (A) | N | 2.75 | yes |  |  |
| THR 25 (A) | O | PHE 26 (A) | N | 2.26 | yes |  |  |
| THR 25 (A) | OG1 | PHE 26 (A) | N | 3.31 | yes |  |  |
| PHE 26 (A) | N | LEU 27 (A) | N | 2.7 | yes |  |  |
| PHE 26 (A) | O | LEU 27 (A) | N | 2.27 | yes |  |  |
| GLY 1 (B) | O | TYR 2 (B) | N | 2.26 | yes |  |  |
| GLY 1 (B) | O | TYR 2 (B) | O | 3.25 | yes |  |  |
| GLY 1 (B) | O | GLU 5 (C) | N | 2.97 |  | yes |  |
| TYR 2 (B) | O | ILE 3 (B) | N | 2.25 | yes |  |  |
| ILE 3 (B) | O | PRO 4 (B) | N | 2.23 | yes |  |  |
| ILE 3 (B) | O | PRO 4 (B) | O | 3.38 | yes |  |  |
| PRO 4 (B) | O | GLU 5 (B) | N | 2.25 | yes |  |  |
| PRO 4 (B) | O | GLU 5 (B) | O | 3.2 | yes |  |  |
| PRO 4 (B) | O | TRP 20 (B) | NE1 | 2.85 | yes |  |  |
| GLU 5 (B) | O | ALA 6 (B) | N | 2.26 | yes |  |  |
| GLU 5 (B) | O | ALA 6 (B) | O | 3.35 | yes |  |  |
| GLU 5 (B) | O | TRP 20 (B) | NE1 | 3.49 | yes |  |  |
| GLU 5 (B) | OE2 | ALA 6 (B) | N | 2.95 | yes |  |  |
| ALA 6 (B) | N | TRP 20 (B) | NE1 | 3.32 | yes |  |  |
| ALA 6 (B) | O | PRO 7 (B) | N | 2.25 | yes |  |  |
| ALA 6 (B) | O | PRO 7 (B) | O | 3.03 | yes |  |  |
| ALA 6 (B) | O | ARG 8 (B) | N | 3.37 | yes |  |  |
| PRO 7 (B) | O | ARG 8 (B) | N | 2.26 | yes |  |  |
| PRO 7 (B) | O | ASP 9 (B) | N | 3.47 | yes |  |  |
| ARG 8 (B) | N | ASP 9 (B) | N | 2.79 | yes |  |  |
| ARG 8 (B) | O | ASP 9 (B) | N | 2.26 | yes |  |  |
| ASP 9 (B) | OD1 | GLN 11 (B) | N | 3.17 | yes |  |  |
| ASP 9 (B) | OD1 | TYR 13 (B) | OH | 2.95 | yes |  |  |
| ASP 9 (B) | OD2 | GLN 11 (B) | OE1 | 2.73 | yes |  |  |
| ASP 9 (B) | OD2 | TYR 13 (B) | OH | 3.08 | yes |  |  |
| GLN 11 (B) | O | ALA 12 (B) | N | 2.26 | yes |  |  |
| ALA 12 (B) | O | TYR 13 (B) | N | 2.28 | yes |  |  |
| ALA 12 (B) | O | LEU 23 (B) | N | 2.98 | yes |  |  |
| TYR 13 (B) | O | VAL 14 (B) | N | 2.29 | yes |  |  |
| VAL 14 (B) | N | VAL 21 (B) | O | 2.9 | yes |  |  |
| VAL 14 (B) | O | ARG 15 (B) | N | 2.24 | yes |  |  |
| VAL 14 (B) | O | VAL 21 (B) | N | 2.92 | yes |  |  |
| VAL 14 (B) | O | VAL 21 (B) | O | 3.46 | yes |  |  |
| ARG 15 (B) | N | LYS 16 (B) | N | 3.49 | yes |  |  |
| ARG 15 (B) | N | TYR 13 (C) | O | 3.08 |  | yes |  |
| ARG 15 (B) | O | LYS 16 (B) | N | 2.25 | yes |  |  |
| ARG 15 (B) | O | TYR 13 (C) | N | 2.82 |  | yes |  |
| ARG 15 (B) | NE | GLU 5 (C) | OE2 | 2.86 |  | yes |  |
| ARG 15 (B) | NH1 | TRP 20 (B) | N | 3.48 | yes |  |  |
| ARG 15 (B) | NH1 | TRP 20 (B) | NE1 | 3.23 | yes |  |  |
| ARG 15 (B) | NH2 | GLY 18 (B) | O | 3.22 | yes |  |  |
| ARG 15 (B) | NH2 | GLU 5 (C) | OE1 | 2.77 |  | yes |  |
| LYS 16 (B) | N | GLU 19 (B) | O | 2.93 | yes |  |  |
| LYS 16 (B) | O | GLY 18 (B) | N | 3.14 | yes |  |  |
| LYS 16 (B) | O | GLU 19 (B) | N | 3 | yes |  |  |
| LYS 16 (B) | O | GLU 19 (B) | O | 3.22 | yes |  |  |
| GLY 18 (B) | N | GLU 19 (B) | N | 2.76 | yes |  |  |
| GLY 18 (B) | O | GLU 19 (B) | N | 2.26 | yes |  |  |
| GLU 19 (B) | O | TRP 20 (B) | N | 2.25 | yes |  |  |
| TRP 20 (B) | N | VAL 21 (B) | N | 3.44 | yes |  |  |
| TRP 20 (B) | O | VAL 21 (B) | N | 2.25 | yes |  |  |
| VAL 21 (B) | O | LEU 22 (B) | N | 2.23 | yes |  |  |
| VAL 21 (B) | O | LEU 22 (B) | O | 3.49 | yes |  |  |
| VAL 21 (B) | O | LEU 23 (B) | N | 3.25 | yes |  |  |
| LEU 22 (B) | N | LEU 23 (B) | N | 3.5 | yes |  |  |
| LEU 22 (B) | O | LEU 23 (B) | N | 2.23 | yes |  |  |
| LEU 22 (B) | O | LEU 23 (B) | O | 3.46 | yes |  |  |
| LEU 22 (B) | O | SER 24 (B) | N | 3.24 | yes |  |  |
| LEU 22 (B) | O | THR 25 (B) | N | 3.39 | yes |  |  |
| LEU 22 (B) | O | THR 25 (B) | OG1 | 2.85 | yes |  |  |
| LEU 23 (B) | N | SER 24 (B) | N | 2.79 | yes |  |  |
| LEU 23 (B) | O | SER 24 (B) | N | 2.25 | yes |  |  |
| LEU 23 (B) | O | THR 25 (B) | N | 3.03 | yes |  |  |
| LEU 23 (B) | O | PHE 26 (B) | N | 2.94 | yes |  |  |
| SER 24 (B) | N | THR 25 (B) | N | 2.79 | yes |  |  |
| SER 24 (B) | O | THR 25 (B) | N | 2.26 | yes |  |  |
| SER 24 (B) | O | PHE 26 (B) | N | 3.22 | yes |  |  |
| SER 24 (B) | O | LEU 27 (B) | N | 3.36 | yes |  |  |
| SER 24 (B) | OG | THR 25 (B) | N | 3.1 | yes |  |  |
| THR 25 (B) | N | PHE 26 (B) | N | 2.75 | yes |  |  |
| THR 25 (B) | O | PHE 26 (B) | N | 2.25 | yes |  |  |
| THR 25 (B) | OG1 | PHE 26 (B) | N | 3.35 | yes |  |  |
| PHE 26 (B) | N | LEU 27 (B) | N | 2.77 | yes |  |  |
| PHE 26 (B) | O | LEU 27 (B) | N | 2.24 | yes |  |  |
| PHE 26 (B) | O | LEU 27 (B) | O | 3.38 | yes |  |  |
| GLY 1 (C) | O | TYR 2 (C) | N | 2.27 | yes |  |  |
| TYR 2 (C) | O | ILE 3 (C) | N | 2.25 | yes |  |  |
| ILE 3 (C) | O | PRO 4 (C) | N | 2.25 | yes |  |  |
| PRO 4 (C) | O | GLU 5 (C) | N | 2.26 | yes |  |  |
| PRO 4 (C) | O | GLU 5 (C) | O | 3.14 | yes |  |  |
| PRO 4 (C) | O | TRP 20 (C) | NE1 | 2.84 | yes |  |  |
| GLU 5 (C) | O | ALA 6 (C) | N | 2.25 | yes |  |  |
| GLU 5 (C) | O | ALA 6 (C) | O | 3.29 | yes |  |  |
| GLU 5 (C) | OE2 | ALA 6 (C) | N | 2.93 | yes |  |  |
| ALA 6 (C) | N | TRP 20 (C) | NE1 | 3.43 | yes |  |  |
| ALA 6 (C) | O | PRO 7 (C) | N | 2.25 | yes |  |  |
| ALA 6 (C) | O | PRO 7 (C) | O | 3.02 | yes |  |  |
| PRO 7 (C) | O | ARG 8 (C) | N | 2.26 | yes |  |  |
| ARG 8 (C) | N | ASP 9 (C) | N | 2.73 | yes |  |  |
| ARG 8 (C) | O | ASP 9 (C) | N | 2.26 | yes |  |  |
| ASP 9 (C) | OD1 | GLN 11 (C) | N | 3.02 | yes |  |  |
| ASP 9 (C) | OD2 | GLN 11 (C) | NE2 | 2.99 | yes |  |  |
| ASP 9 (C) | OD2 | TYR 13 (C) | OH | 2.95 | yes |  |  |
| GLN 11 (C) | O | ALA 12 (C) | N | 2.25 | yes |  |  |
| ALA 12 (C) | O | TYR 13 (C) | N | 2.28 | yes |  |  |
| ALA 12 (C) | O | LEU 23 (C) | N | 2.92 | yes |  |  |
| TYR 13 (C) | O | VAL 14 (C) | N | 2.28 | yes |  |  |
| VAL 14 (C) | N | VAL 21 (C) | O | 2.87 | yes |  |  |
| VAL 14 (C) | O | ARG 15 (C) | N | 2.25 | yes |  |  |
| VAL 14 (C) | O | VAL 21 (C) | N | 2.91 | yes |  |  |
| VAL 14 (C) | O | VAL 21 (C) | O | 3.33 | yes |  |  |
| ARG 15 (C) | O | LYS 16 (C) | N | 2.24 | yes |  |  |
| ARG 15 (C) | NH1 | TRP 20 (C) | NE1 | 3.25 | yes |  |  |
| ARG 15 (C) | NH2 | GLY 18 (C) | O | 3.19 | yes |  |  |
| LYS 16 (C) | N | GLU 19 (C) | O | 2.89 | yes |  |  |
| LYS 16 (C) | O | GLY 18 (C) | N | 3.21 | yes |  |  |
| LYS 16 (C) | O | GLU 19 (C) | N | 3.08 | yes |  |  |
| LYS 16 (C) | O | GLU 19 (C) | O | 3.18 | yes |  |  |
| GLY 18 (C) | N | GLU 19 (C) | N | 2.77 | yes |  |  |
| GLY 18 (C) | O | GLU 19 (C) | N | 2.25 | yes |  |  |
| GLY 18 (C) | O | GLU 19 (C) | OE1 | 3.45 | yes |  |  |
| GLY 18 (C) | O | GLU 19 (C) | OE2 | 3.35 | yes |  |  |
| GLU 19 (C) | O | TRP 20 (C) | N | 2.25 | yes |  |  |
| TRP 20 (C) | N | VAL 21 (C) | N | 3.49 | yes |  |  |
| TRP 20 (C) | O | VAL 21 (C) | N | 2.27 | yes |  |  |
| VAL 21 (C) | O | LEU 22 (C) | N | 2.23 | yes |  |  |
| VAL 21 (C) | O | LEU 23 (C) | N | 3.37 | yes |  |  |
| LEU 22 (C) | O | LEU 23 (C) | N | 2.24 | yes |  |  |
| LEU 22 (C) | O | SER 24 (C) | N | 3.27 | yes |  |  |
| LEU 22 (C) | O | THR 25 (C) | N | 3.22 | yes |  |  |
| LEU 22 (C) | O | THR 25 (C) | OG1 | 2.64 | yes |  |  |
| LEU 23 (C) | N | SER 24 (C) | N | 2.79 | yes |  |  |
| LEU 23 (C) | O | SER 24 (C) | N | 2.27 | yes |  |  |
| LEU 23 (C) | O | THR 25 (C) | N | 3 | yes |  |  |
| LEU 23 (C) | O | PHE 26 (C) | N | 2.93 | yes |  |  |
| SER 24 (C) | N | THR 25 (C) | N | 2.75 | yes |  |  |
| SER 24 (C) | O | THR 25 (C) | N | 2.25 | yes |  |  |
| SER 24 (C) | O | THR 25 (C) | O | 3.49 | yes |  |  |
| SER 24 (C) | O | PHE 26 (C) | N | 3.07 | yes |  |  |
| SER 24 (C) | O | LEU 27 (C) | N | 3.32 | yes |  |  |
| SER 24 (C) | OG | THR 25 (C) | N | 3.29 | yes |  |  |
| THR 25 (C) | N | PHE 26 (C) | N | 2.76 | yes |  |  |
| THR 25 (C) | O | PHE 26 (C) | N | 2.25 | yes |  |  |
| PHE 26 (C) | N | LEU 27 (C) | N | 2.75 | yes |  |  |
| PHE 26 (C) | O | LEU 27 (C) | N | 2.24 | yes |  |  |
|  |  |  |  | **sums** | **194** | **17** | **211** |

**Table S16:** Salt bridges in the foldon 0 trimer.

| chain1 | residue1 | res_id1 | atom1 | chain2 | residue2 | res_id2 | atom2 | Distance [Å] | intracatenane | intercatenane | total |
| --- | --- | --- | --- | --- | --- | --- | --- | --- | --- | --- | --- |
| A | GLU | 5 | OE2 | B | ARG | 15 | NE | 2.85 |  | yes |  |
| A | GLU | 5 | OE2 | B | ARG | 15 | NH2 | 2.29 |  | yes |  |
| A | ARG | 15 | NE | A | GLU | 19 | O | 3.82 | yes |  |  |
| A | ARG | 15 | NE | C | GLU | 5 | OE2 | 2.97 |  | yes |  |
| A | ARG | 15 | NH1 | A | GLU | 19 | O | 3.94 | yes |  |  |
| A | ARG | 15 | NH2 | C | GLU | 5 | OE1 | 3.58 |  | yes |  |
| A | ARG | 15 | NH2 | C | GLU | 5 | OE2 | 2.26 |  | yes |  |
| A | LYS | 16 | N | A | GLU | 19 | O | 3.16 | yes |  |  |
| B | GLU | 5 | OE1 | B | ARG | 8 | NE | 3.39 | yes |  |  |
| B | GLU | 5 | OE1 | B | ARG | 8 | NH2 | 2.64 | yes |  |  |
| B | GLU | 5 | OE1 | C | ARG | 15 | NH2 | 3.54 |  | yes |  |
| B | GLU | 5 | OE2 | B | ARG | 8 | NE | 3.42 | yes |  |  |
| B | GLU | 5 | OE2 | B | ARG | 8 | NH2 | 3.66 | yes |  |  |
| B | GLU | 5 | OE2 | C | ARG | 15 | NE | 2.96 |  | yes |  |
| B | GLU | 5 | OE2 | C | ARG | 15 | NH2 | 2.28 |  | yes |  |
| B | LYS | 16 | N | B | GLU | 19 | O | 3.04 | yes |  |  |
| C | ARG | 15 | NE | C | GLU | 19 | O | 3.82 | yes |  |  |
| C | LYS | 16 | N | C | GLU | 19 | O | 3.02 | yes |  |  |
|  |  |  |  |  |  |  |  | **sums** | **10** | **8** | **18** |

**Table S17:** Salt bridges in the foldon 1 trimer.

| Residue 1 | Atom 1 | Residue 2 | Atom 2 | Distance [Å] | intracatenane | intercatenane | total |
| --- | --- | --- | --- | --- | --- | --- | --- |
| GLU 5 (A) | OE1 | ARG 15 (C) | NE | 3.7 |  | yes |  |
| GLU 5 (A) | OE1 | ARG 15 (C) | NH2 | 2.82 |  | yes |  |
| GLU 5 (A) | OE2 | ARG 15 (C) | NE | 2.87 |  | yes |  |
| GLU 5 (A) | OE2 | ARG 15 (C) | NH2 | 3.54 |  | yes |  |
| ARG 15 (A) | NE | GLU 19 (A) | O | 3.95 | yes |  |  |
| ARG 15 (A) | NE | GLU 5 (B) | OE1 | 3.59 |  | yes |  |
| ARG 15 (A) | NE | GLU 5 (B) | OE2 | 2.89 |  | yes |  |
| ARG 15 (A) | NH1 | GLU 19 (A) | O | 3.87 | yes |  |  |
| ARG 15 (A) | NH2 | GLU 5 (B) | OE1 | 2.78 |  | yes |  |
| ARG 15 (A) | NH2 | GLU 5 (B) | OE2 | 3.62 |  | yes |  |
| LYS 16 (A) | N | GLU 19 (A) | O | 2.91 | yes |  |  |
| ARG 15 (B) | NE | GLU 19 (B) | O | 3.94 | yes |  |  |
| ARG 15 (B) | NE | GLU 5 (C) | OE1 | 3.54 |  | yes |  |
| ARG 15 (B) | NE | GLU 5 (C) | OE2 | 2.86 |  | yes |  |
| ARG 15 (B) | NH1 | GLU 19 (B) | O | 3.64 | yes |  |  |
| ARG 15 (B) | NH2 | GLU 5 (C) | OE1 | 2.77 |  | yes |  |
| ARG 15 (B) | NH2 | GLU 5 (C) | OE2 | 3.64 |  | yes |  |
| LYS 16 (B) | N | GLU 19 (B) | O | 2.93 | yes |  |  |
| ARG 15 (C) | NE | GLU 19 (C) | O | 3.95 | yes |  |  |
| ARG 15 (C) | NH1 | GLU 19 (C) | O | 3.88 | yes |  |  |
| LYS 16 (C) | N | GLU 19 (C) | O | 2.89 | yes |  |  |
|  |  |  |  | **sums** | **9** | **12** | **21** |

**Table S18:** Drift times, experimentally determined CCS, and literature references of calibrant proteins.

| **protein**  **name** | **species** | **CCS determinations** a) | | | |  | **CCS from literature** a) | | | **reference** |
| --- | --- | --- | --- | --- | --- | --- | --- | --- | --- | --- |
| ***m/z*** | **z** | **dt exp.** | **TWCCSN2** |  | ***m/z*** | **z** | **CCS exp.** |  |
| serum | Bos | 4432,04 | 15 | 18,80 | 4310 |  | 4600,07 | 15 | 4490 | 53 |
| albumin | taurus | 4432,59 | 15 | 18,80 | 4310 |  | / | / | / |  |
|  |  | 4155,21 | 16 | 17,56 | 4460 |  | 4312,56 | 16 | 4470 | 53 |
|  |  | 4155,07 | 16 | 17,42 | 4445 |  | / | / | / |  |
|  |  | 3910,85 | 17 | 17,28 | 4706 |  | 4058,88 | 17 | 4490 | 53 |
|  |  | 3911,10 | 17 | 17,56 | 4740 |  | / | / | / |  |
| myoglobin | Equus | 2196,44 | 8 | 11,06 | 1872 |  | 2196,90 | 8 | 1937 | 54 |
| (holo) | caballus | 2196,42 | 8 | 11,20 | 1879 |  | / | / | / |  |
|  |  | 1952,60 | 9 | 10,09 | 2045 |  | 1952,90 | 9 | 2085 | 54 |
|  |  | 1952,47 | 9 | 10,23 | 2054 |  | / | / | / |  |
| cytochrome c | Equus | 2473,12 | 5 | 12,03 | 1204 |  | 2472,80 | 5 | 1146 | 54 |
|  | caballus | 2473,14 | 5 | 11,89 | 1199 |  | / | / | / |  |
|  |  | 2060,97 | 6 | 10,37 | 1376 |  | 2060,90 | 6 | 1477/1490 | 53/54 |
|  |  | 2061,15 | 6 | 10,51 | 1381 |  | / | / | / |  |
|  |  | 1766,45 | 7 | 11,20 | 1645 |  | 1714,43 | 7 | 1590 | 53 |
|  |  | 1766,58 | 7 | 11,34 | 1652 |  | / | / | / |  |
|  |  | 1545,66 | 8 | 10,23 | 1827 |  | / | / | / |  |
|  |  | 1545,66 | 8 | 10,37 | 1835 |  | / | / | / |  |
| ubiquitin | Bos | 2142,17 | 4 | 11,75 | 956 |  | 2141,00 | 4 | 949 | 54 |
|  | taurus | 2142,21 | 4 | 11,75 | 956 |  | / | / | / |  |
|  |  | 1713,93 | 5 | 9,95 | 1132 |  | 1713,00 | 5 | 1011 | 54 |
|  |  | 1713,97 | 5 | 10,09 | 1137 |  | / | / | / |  |
|  |  | 1428,45 | 6 | 8,85 | 1313 |  | / | / | / |  |
|  |  | 1428,45 | 6 | 11,2 | 1411 |  | / | / | / |  |
|  |  | 1428,46 | 6 | 8,99 | 1319 |  | / | / | / |  |
|  |  | 1428,45 | 6 | 11,47 | 1423 |  | / | / | / |  |
| insulin | Bos | 1912,25 | 3 | 12,3 | 729 |  | 1912,25 | 3 | 729 | b) |
|  | taurus | 1912,25 | 3 | 12,44 | 732 |  | 1912,25 | 3 | 732 |  |
|  |  | 1434,19 | 4 | 8,43 | 865 |  | 1434,19 | 4 | 865 |  |
|  |  | 1434,19 | 4 | 8,57 | 868 |  | 1434,19 | 4 | 868 |  |
|  |  | 1147,55 | 5 | 7,19 | 1038 |  | 1147,55 | 5 | 1038 |  |
|  |  | 1147,55 | 5 | 7,19 | 1038 |  | 1147,55 | 5 | 1038 |  |

a) drift gas: nitrogen

b) this work
